# Supplementary material for: Computational determination of the mechanism of the Pd-catalyzed formation of isatoic anhydrides from o-haloanilines, CO, and CO2
Source: Royal Society of Chemistry journal article supplement (doi:10.1039/d1dt02551a), 2021-01-01
Supplement: d1dt02551a1.pdf [file d1dt02551a1.pdf]

## Supporting Information

### Computational Determination of the Mechanism of Pd-Catalyzed Formation of Isatoic Anhydrides from *o*-Haloanilines, CO, and CO<sub>2</sub>

Jun Gu,<sup>a</sup> Fengyue Zhao,<sup>a</sup> K. N. Houk,<sup>b</sup> Qianqian Lu,<sup>a,\*</sup> and Fang Liu<sup>a,\*</sup>

<sup>a</sup>*College of Sciences, Nanjing Agricultural University, Nanjing, Jiangsu 210095, China.*

<sup>b</sup>*Department of Chemistry and Biochemistry, University of California, Los Angeles, CA 90095,  
USA*

E-mail: luqq@njau.edu.cn; acialiu@njau.edu.cn;

#### Table of Contents

|                                                                                           |         |
|-------------------------------------------------------------------------------------------|---------|
| Oxidative addition of <i>o</i> -iodoaniline with Pd(PPh <sub>3</sub> ) <sub>2</sub> ..... | S2      |
| Carbonylation of isomer <b>IntA5'</b> .....                                               | S3      |
| Direct deprotonation of the amine by I <sup>-</sup> .....                                 | S4      |
| Inner-CMD mechanism for N-H activation.....                                               | S5      |
| Concerted N-H activation/carboxylation pathway of <b>IntA3</b> .....                      | S6      |
| Scanning result of N-H activation of <b>IntA19</b> .....                                  | S7      |
| Regioselectivity of carbonylation in <b>IntA25</b> .....                                  | S8      |
| Regioselectivity of carbonylation in <b>IntB10</b> .....                                  | S8      |
| Reductive elimination of <b>IntB11</b> .....                                              | S9      |
| Energies of species based on gas optimization by ωB97XD.....                              | S10-S11 |
| Cartesian coordinates for all optimized geometries.....                                   | S11-S86 |

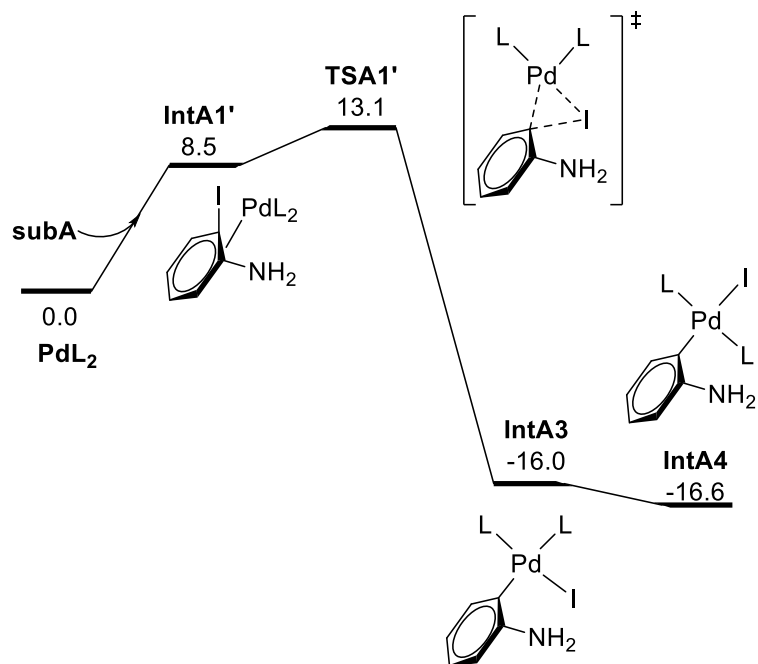

**Figure S1.** The Gibbs free energy (in kcal/mol) profiles of oxidative addition of *o*-iodoaniline with Pd(PPh<sub>3</sub>)<sub>2</sub>.

As shown in Figure S1, *o*-iodoaniline participates into reaction generates **IntA1'** without exchange with the ligand of active catalyst. Then oxidative addition via transition state **TSA1'** directly generates arylpalladium intermediate **IntA3**. This oxidative addition step has a 13.1 kcal/mol energy barrier.

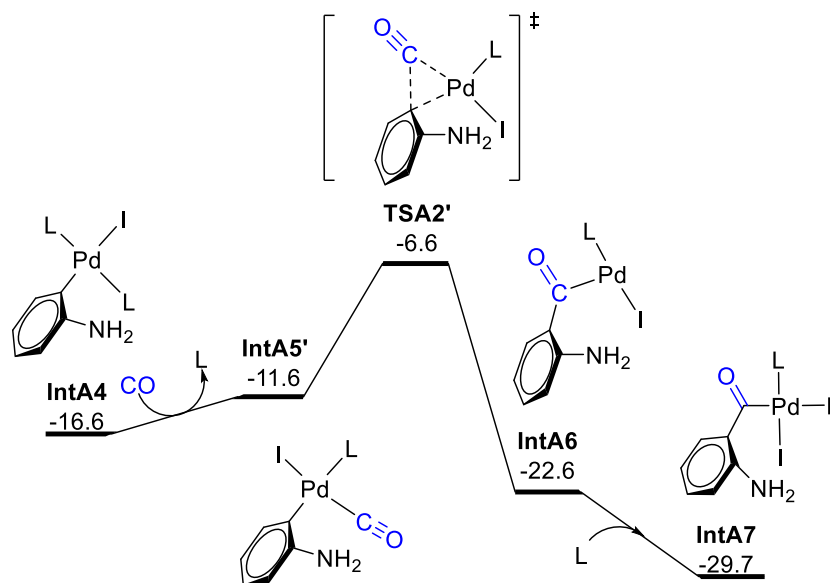

**Figure S2.** The Gibbs free energy (in kcal/mol) profiles of carbonylation of isomer **IntA5'**.

As shown in Figure S2, the ligand exchange of CO with one phosphine ligand of **IntA4** generates **IntA5'**, which is the isomer of **IntA5**. Then carbonylation via transition state **TSA2'** generates **IntA6** with an energy barrier of 10.0 kcal/mol.

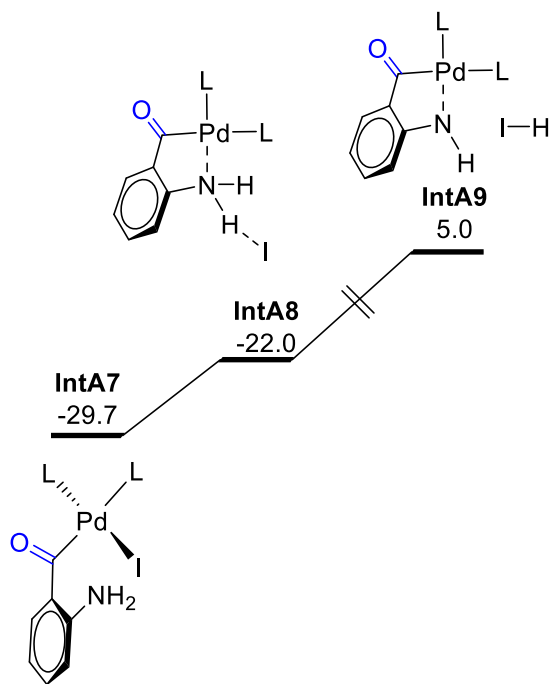

**Figure S3.** The Gibbs free energy (in kcal/mol) profiles of direct deprotonation of the amine by I.

In view of Figure S3, intermediate **IntA7** rearranges into **IntA8**, in which the amine group is coordinated with the Pd center and the I is coordinated with the amine through hydrogen-bonding interaction. However, calculated results indicate that the deprotonation energy of I to activate N-H bond is up to 34.7 kcal/mol. This hypothesis suggests that weakly basic I cannot activate N-H bond.

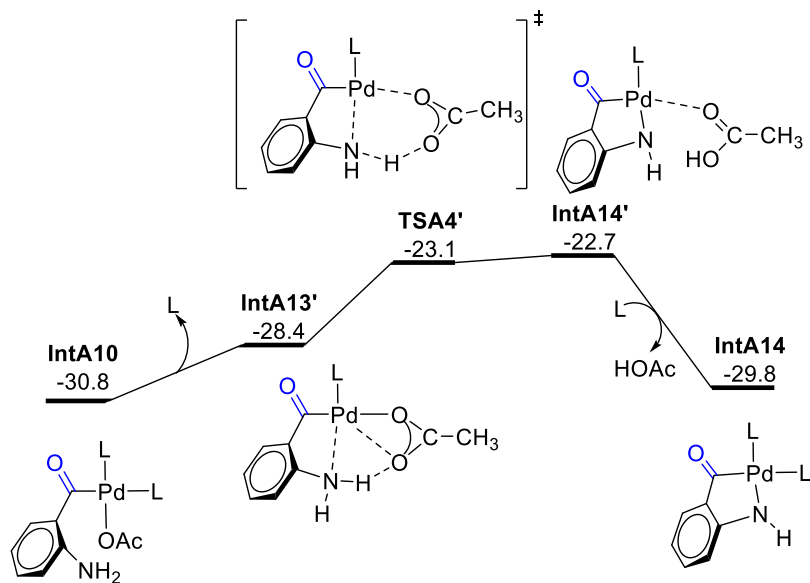

**Figure S4.** The Gibbs free energy (in kcal/mol) profiles of inner-CMD mechanism for the N-H activation of **IntA10**.

As indicated in Figure S4, **IntA10** converts to **IntA13'** through ligand exchange of  $\text{OAc}^-$  with phosphine ligand and coordination of amine group to the Pd center. **IntA13'** then goes through N-H bond activation via **TSA4'** and generates five-membered palladacycle **IntA14**. The energy barrier of this step is 8.1 kcal/mol.

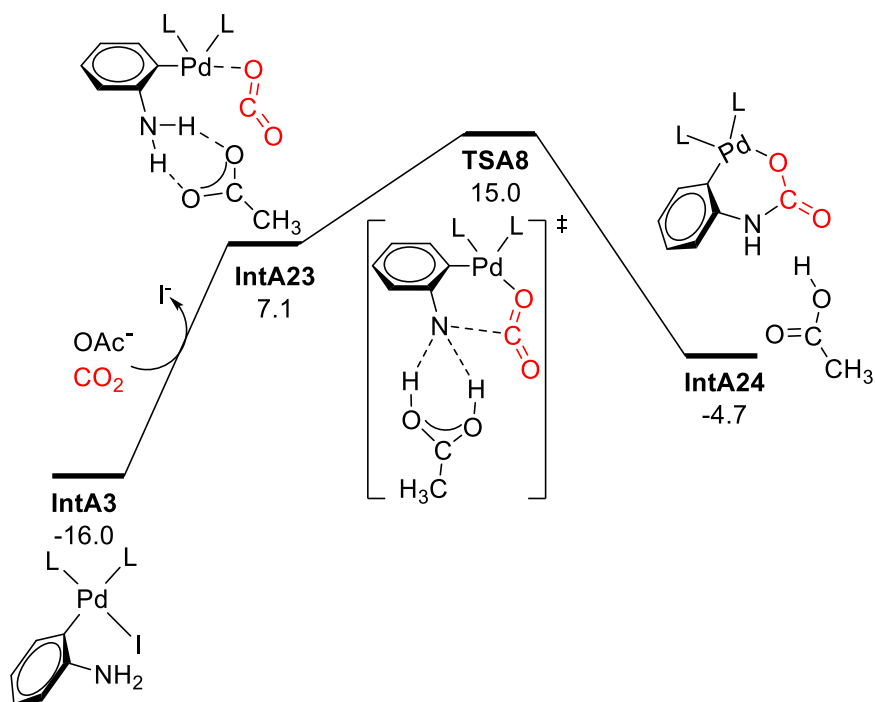

**Figure S5.** The Gibbs free energy (in kcal/mol) profiles of concerted N-H activation/carboxylation pathway of **IntA3**.

As shown in Figure S5, the dissociative  $\text{OAc}^-$  of **IntA23** is stabilized by the dual hydrogen-bonding interactions with amine group, and  $\text{CO}_2$  is coordinated to the Pd center. This process through transition state **TSA8** generates **IntA24** with an energy barrier of 31.0 kcal/mol.

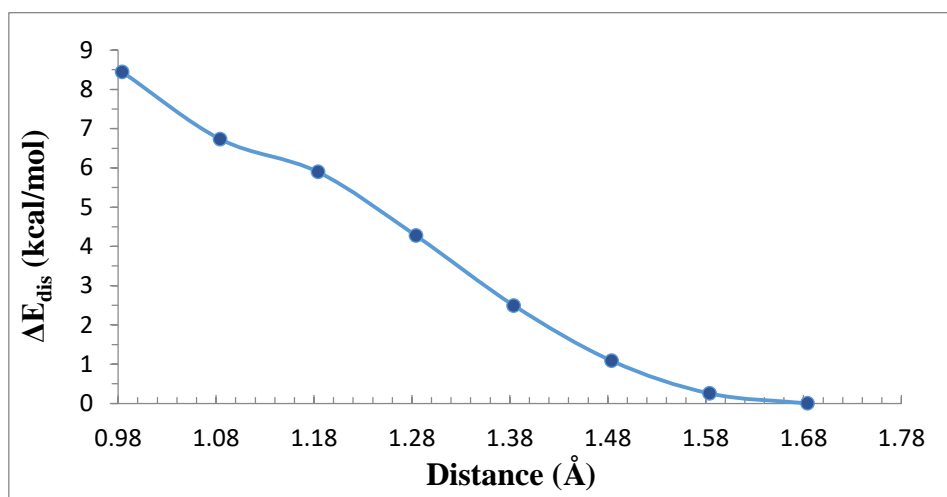

**Figure S6.** Energy profiles of the scanning result of N-H activation of **IntA19**.

In order to locate the N-H activation transition state of **IntA19**, a scan of the distance from amine-H to O (1.68 Å→0.98 Å), in interval of 0.1 Å, was performed. As shown in Figure S6, there is no obvious turning point in the scanning curve, which indicates that the N-H activation of **IntA19** is barrierless and endergonic.

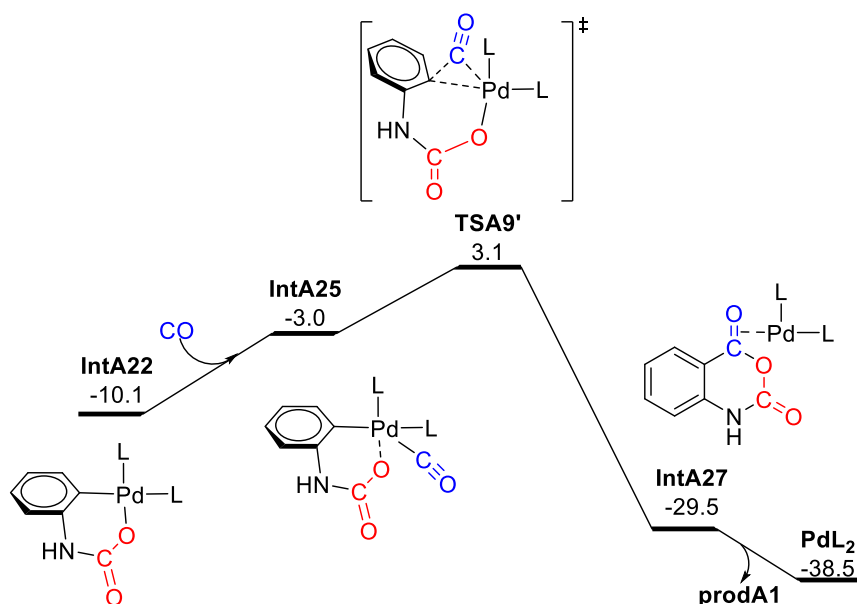

**Figure S7.** The Gibbs free energy (in kcal/mol) profiles of regioselectivity of carbonylation in **IntA25**.

As shown in Figure S7, the regioselectivity of CO inserted into Ar-Pd bond via **TSA9'** with an energy barrier of 19.1 kcal/mol (**IntA3**  $\rightarrow$  **TSA9'**).

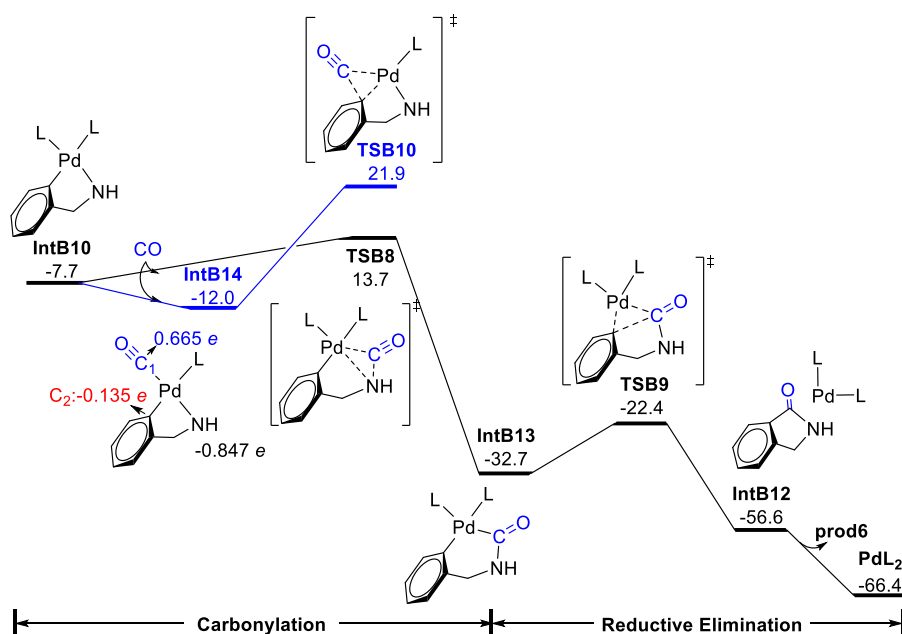

**Figure S8.** The Gibbs free energy (in kcal/mol) profiles for the formation of mono-carbonylation from **IntB10**.



In Figure S8, CO is inserted into the Pd-N bond through the transition state **TSB7** to complete the carbonylation step, and the energy barrier in this process is as high as 33.2 kcal/mol. However, when carbonylation occurs inserted into Pd-C bond, the energy barrier of **TSB10** is as high as 41.2 kcal/mol. In this regard, NBO analysis was performed on **IntB20**. It is found that C1 is an electron-poor atom, while C2 and N are electron-rich atoms with charges of  $-0.135e$  and  $-0.847e$ , respectively. NBO analysis results show that electron-poor C1 tends to combine with more electron-rich N, which results in the lower energy of carbonylation transition state **TSB8** than **TSB10**.

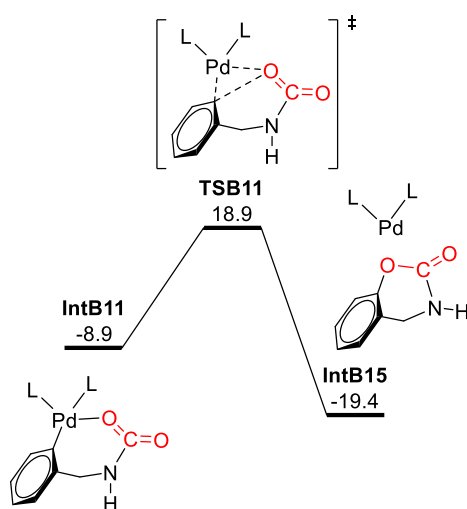

**Figure S9.** The Gibbs free energy (in kcal/mol) profiles of reductive elimination step of **IntB11** for the mono-carboxylation pathway.

As shown in Figure S9, the **IntB11** through **TSB11** to generate mono-carboxylation product with an energy barrier of 38.4 kcal/mol (**IntB9**→**TSB11**).

**Table S1. Thermal correction of Gibbs free energy (TCG, hartree) and total electronic energies (E, hartree) in Tetrahydrofuran solvent for all species involved in this study <sup>a</sup>**

| Compounds             | TCG       | E              | Compounds | TCG      | E              |
|-----------------------|-----------|----------------|-----------|----------|----------------|
| CO                    | -0.014016 | -113.281513931 | IntA14'   | 0.383803 | -1792.50618739 |
| CO <sub>2</sub>       | -0.008881 | -188.560487267 | IntA19    | 0.638647 | -2715.12357479 |
| OAc <sup>•</sup>      | 0.021462  | -228.550979465 | IntA20    | 0.577815 | -2486.05121139 |
| HOAc                  | 0.035672  | -229.039781581 | TSA7      | 0.587481 | -2674.61492785 |
| <i>o</i> -Iodoaniline | 0.075419  | -298.257586322 | IntA21    | 0.592568 | -2674.62879735 |
| PPh <sub>3</sub>      | 0.231568  | -1035.91986079 | IntA22    | 0.592111 | -2674.65243620 |
| I <sup>•</sup>        | -0.016848 | -11.5629944664 | IntA25    | 0.598433 | -2787.94299868 |
| IntA0                 | 0.480541  | -2199.82771393 | TSA9      | 0.600367 | -2787.93865870 |
| IntA1                 | 0.324124  | -1462.14754592 | IntA26    | 0.601728 | -2787.95307169 |
| TSA1                  | 0.322918  | -1462.14534067 | TSA10     | 0.601360 | -2787.94587605 |
| IntA2                 | 0.327813  | -1462.17133839 | IntA27    | 0.598954 | -2787.98569285 |
| IntA3                 | 0.588724  | -2498.14355352 | IntA23    | 0.644872 | -2903.68187481 |
| IntA4                 | 0.587451  | -2498.14327187 | TSA8      | 0.647952 | -2903.67242434 |
| IntA5                 | 0.332501  | -1575.49310303 | IntA24    | 0.651198 | -2903.70714217 |
| TSA2                  | 0.331849  | -1575.48094022 | TSA11     | 0.581406 | -2599.35241128 |
| IntA6                 | 0.334921  | -1575.50748044 | IntA28    | 0.585605 | -2599.36989417 |
| IntA7                 | 0.596496  | -2611.46868713 | TSA12     | 0.590561 | -2674.59305479 |
| IntA10                | 0.646629  | -2828.47023112 | IntA29    | 0.591240 | -2674.65712975 |
| IntA13                | 0.645235  | -2828.45673922 | IntA30    | 0.329566 | -1676.75375615 |
| TSA4                  | 0.642399  | -2828.45367275 | TSA13     | 0.329834 | -1676.71351624 |
| IntA14                | 0.585611  | -2599.40350728 | IntA31    | 0.333299 | -1676.76205715 |
| TSA5                  | 0.595978  | -2787.96069743 | IntA32    | 0.596221 | -2712.71785313 |
| IntA15                | 0.598750  | -2787.96443497 | TSA14     | 0.593112 | -2712.69698149 |
| IntA16                | 0.599459  | -2787.96833112 | IntA33    | 0.594969 | -2712.73294389 |
| TSA6                  | 0.601886  | -2787.96039420 | prodA4    | 0.084225 | -512.887758751 |
| IntA17                | 0.596125  | -2787.98569285 | TSA9'     | 0.600582 | -2787.93552280 |
| prodA1                | 0.088957  | -588.142890826 | subB      | 0.102649 | -337.53656766  |
| IntA1'                | 0.586782  | -2498.10254656 | IntB1     | 0.354034 | -1501.42883238 |
| TSA1'                 | 0.587529  | -2498.09606881 | TSB1      | 0.356117 | -1501.42769915 |
| IntA5'                | 0.331000  | -1575.48611168 | IntB2     | 0.615215 | -2537.42433793 |
| TSA2'                 | 0.332088  | -1575.47918340 | TSB2      | 0.361962 | -1614.75945082 |
| IntA8                 | 0.595927  | -2611.45584162 | IntB3     | 0.623893 | -2650.74520859 |
| IntA9                 | 0.587531  | -2611.40437640 | IntB4     | 0.675634 | -2867.74263087 |
| IntA11                | 0.651577  | -3017.00756802 | IntB5     | 0.612478 | -2638.67020030 |
| TSA3                  | 0.654647  | -3016.98851787 | TSB3      | 0.625708 | -2827.23042270 |
| IntA12                | 0.657760  | -3017.02061268 | IntB6     | 0.629860 | -2827.24643708 |
| IntA13'               | 0.386342  | -1792.51778257 | TSB4      | 0.629162 | -2827.23108779 |
| TSA4'                 | 0.381943  | -1792.50504932 | IntB7     | 0.624321 | -2827.26249051 |

<sup>a</sup> The intermediates and transition states are calculated at the S10

M06/6-311+G(d,p)(SDD)// $\omega$ B97XD/6-31G(d)(LANL2DZ) level of theory.

**Table S1. Thermal correction of Gibbs free energy (TCG, hartree) and total electronic energies (E, hartree) in Tetrahydrofuran solvent for all species involved in this study <sup>a</sup>**

| Compounds     | TCG      | E              | Compounds     | TCG      | E              |
|---------------|----------|----------------|---------------|----------|----------------|
| <b>prodB1</b> | 0.116807 | -627.41462726  | <b>TSB9</b>   | 0.617496 | -2638.67534194 |
| <b>IntB8</b>  | 0.618616 | -2537.42168164 | <b>IntB14</b> | 0.350418 | -1602.70345325 |
| <b>IntB9</b>  | 0.669193 | -2754.43108652 | <b>TSB10</b>  | 0.353894 | -1602.65276140 |
| <b>IntB10</b> | 0.608186 | -2525.34710172 | <b>TSB11</b>  | 0.618592 | -2713.88455408 |
| <b>TSB5</b>   | 0.616845 | -2713.91143432 | <b>IntB15</b> | 0.619720 | -2713.94671244 |
| <b>IntB11</b> | 0.620888 | -2713.93107278 | <b>prodB4</b> | 0.108676 | -514.10078945  |
| <b>TSB6</b>   | 0.627832 | -2827.22071426 |               |          |                |
| <b>TSB7</b>   | 0.613449 | -2638.66566413 |               |          |                |
| <b>IntB12</b> | 0.615671 | -2638.72811274 |               |          |                |
| <b>prodB2</b> | 0.104620 | -438.88547655  |               |          |                |
| <b>TSB8</b>   | 0.616683 | -2638.61708221 |               |          |                |
| <b>IntB13</b> | 0.617122 | -2638.69148582 |               |          |                |

<sup>a</sup> The intermediates and transition states are calculated at the M06/6-311+G(d,p)(SDD)// $\omega$ B97XD/6-31G(d)(LANL2DZ) level of theory.

**Cartesian coordinates for all optimized geometries**

**CO**

C 0.00000000 0.00000000 -0.64872700  
 O 0.00000000 0.00000000 0.48654500

**CO<sub>2</sub>**

C 0.00000000 0.00000000 0.00000000  
 O 0.00000000 0.00000000 1.16469000  
 O 0.00000000 0.00000000 -1.16469000

**OAc<sup>-</sup>**

O 0.80486600 -1.10406300 -0.00003400  
 C 0.21884500 0.00156800 -0.00007200  
 C -1.35042500 -0.05364300 -0.00000200  
 H -1.72550300 -1.08387300 -0.00164900  
 H -1.74158100 0.47170300 0.88196700  
 H -1.74190700 0.47482400 -0.87994300  
 O 0.69494300 1.16028700 0.00004200

**HOAc**

C -0.09757900 0.09997200 -0.08353700  
 O -0.66945500 1.11015800 -0.41246000  
 O -0.75822600 -1.02064200 0.27534000  
 H -1.70343200 -0.81078700 0.20438800

C 1.39308800 -0.09173900 -0.01200400  
 H 1.89237400 0.82556800 -0.32250700  
 H 1.68494800 -0.34866800 1.01066100  
 H 1.69452400 -0.92077300 -0.65894200

***o*-Iodoaniline**

C 2.52116800 -1.55153700 0.00722000  
 C 1.13521300 -1.45190700 0.00702700  
 C 0.52224400 -0.20332500 -0.00039700  
 C 1.26926000 0.98418800 -0.00755400  
 C 2.66977500 0.85594600 -0.00554100  
 C 3.28358200 -0.38577700 0.00007500  
 H 2.99495200 -2.52733200 0.01267000  
 H 0.52555300 -2.34879100 0.01356700  
 H 3.27302600 1.76040600 -0.01714000  
 H 4.36796600 -0.44233200 0.00042900  
 N 0.69442500 2.24292200 -0.06902900  
 H -0.25391900 2.32105900 0.27074000  
 H 1.28435700 2.99762200 0.24948100  
 I -1.61246000 -0.13106800 -0.00097200

**PPh<sub>3</sub>**

P 0.04663300 -0.04843700 -1.26144300  
 C -0.61156900 -3.22087400 1.34489300  
 H -1.21794700 -3.43917900 2.21934100

|              |             |             |             |   |             |             |             |
|--------------|-------------|-------------|-------------|---|-------------|-------------|-------------|
| C            | -2.66741300 | 0.50945500  | -1.12231700 | C | 2.93038400  | -0.31699100 | 4.35337400  |
| H            | -2.71180300 | -0.11791700 | -2.00946000 | H | 4.66412700  | -1.51028600 | 3.90074400  |
| C            | -1.39224300 | 1.58031700  | 0.61731800  | H | 1.14166200  | 0.88143900  | 4.48681700  |
| H            | -0.44336700 | 1.78795300  | 1.10292500  | H | 3.06535600  | -0.38599400 | 5.42899900  |
| C            | -1.43163600 | 0.75581200  | -0.51168000 | C | 3.29117200  | -1.33986200 | -0.93827600 |
| C            | -2.56252300 | 2.13880000  | 1.12580300  | C | 2.67957100  | -2.58814500 | -1.10064800 |
| H            | -2.51608200 | 2.77925300  | 2.00197300  | C | 4.63233400  | -1.18829800 | -1.30197200 |
| C            | 2.03661900  | 0.41419400  | 0.75758800  | C | 3.40030600  | -3.66925600 | -1.59687200 |
| H            | 1.71163400  | -0.50788900 | 1.23035600  | H | 1.62918000  | -2.70187700 | -0.84157000 |
| C            | 1.42175200  | 0.84540600  | -0.42216700 | C | 5.35053700  | -2.26911100 | -1.80810100 |
| C            | -0.69928500 | -1.96914000 | 0.74019300  | H | 5.11832100  | -0.22287000 | -1.19459100 |
| H            | -1.37146100 | -1.22103200 | 1.14976400  | C | 4.73800300  | -3.51095300 | -1.95217700 |
| C            | 3.48564600  | 2.34625100  | 0.73996400  | H | 2.91440500  | -4.63324100 | -1.71574100 |
| H            | 4.28619900  | 2.92586300  | 1.19032500  | H | 6.39096300  | -2.13864700 | -2.09154700 |
| C            | 1.86308500  | 2.03437800  | -1.01567600 | H | 5.29974900  | -4.35218600 | -2.34781500 |
| H            | 1.40415800  | 2.37482500  | -1.94092900 | C | 3.20631900  | 1.52254400  | -0.67394100 |
| C            | 0.07088100  | -1.67062900 | -0.38830100 | C | 4.25573900  | 2.03516600  | 0.09462500  |
| C            | -3.78711300 | 1.87642400  | 0.51772600  | C | 2.84757300  | 2.17698100  | -1.85722900 |
| H            | -4.69848300 | 2.31230300  | 0.91658100  | C | 4.94114900  | 3.17395100  | -0.32092900 |
| C            | 3.06388400  | 1.15899000  | 1.33216400  | H | 4.53595600  | 1.54713300  | 1.02381400  |
| H            | 3.53381500  | 0.81031300  | 2.24737500  | C | 3.53831500  | 3.30949300  | -2.27626800 |
| C            | 1.02156400  | -3.90164300 | -0.28929900 | H | 2.01405500  | 1.79643400  | -2.44310000 |
| H            | 1.69237800  | -4.65255800 | -0.69647900 | C | 4.58674200  | 3.80996200  | -1.50781200 |
| C            | -3.83803600 | 1.05764700  | -0.60787000 | H | 5.75229300  | 3.56581900  | 0.28594300  |
| H            | -4.78889200 | 0.85284200  | -1.09117500 | H | 3.25103500  | 3.80729700  | -3.19775800 |
| C            | 0.92481200  | -2.65543000 | -0.90002000 | H | 5.12156200  | 4.69895200  | -1.82937500 |
| H            | 1.51920700  | -2.44281000 | -1.78552500 | C | -3.22720100 | -1.49824400 | -0.72215800 |
| C            | 0.25044900  | -4.18771700 | 0.83484200  | C | -4.28310600 | -2.02159400 | 0.03012900  |
| H            | 0.31794000  | -5.16277400 | 1.30852000  | C | -2.87785800 | -2.11829400 | -1.92659000 |
| C            | 2.88103700  | 2.78462800  | -0.43578800 | C | -4.98404200 | -3.13678000 | -0.42191600 |
| H            | 3.20841600  | 3.70697400  | -0.90669100 | H | -4.55626900 | -1.56054800 | 0.97506500  |
| <b>I</b>     |             |             |             | C | -3.58405600 | -3.22702900 | -2.38192600 |
| I            | 0.00000000  | 0.00000000  | 0.00000000  | H | -2.03962000 | -1.72997700 | -2.50050100 |
| <b>IntA0</b> |             |             |             | C | -4.63880300 | -3.73823100 | -1.62934800 |
| Pd           | -0.00015900 | -0.00472600 | -0.65624800 | H | -5.80013300 | -3.53736100 | 0.17250700  |
| P            | -2.26570100 | -0.01325900 | -0.22762200 | H | -3.30396600 | -3.69818700 | -3.31949600 |
| P            | 2.26530100  | 0.00936900  | -0.22763200 | H | -5.18573700 | -4.60889800 | -1.97940800 |
| C            | 2.57921300  | -0.15266500 | 1.57941800  | C | -2.57699800 | 0.09464500  | 1.58394100  |
| C            | 3.65460000  | -0.86661700 | 2.11587000  | C | -1.68288400 | -0.56766000 | 2.43352500  |
| C            | 1.67862600  | 0.47264200  | 2.44993900  | C | -3.64406800 | 0.80322400  | 2.14362700  |
| C            | 3.82751200  | -0.94799600 | 3.49602300  | C | -1.85725900 | -0.53176500 | 3.81272100  |
| H            | 4.35646600  | -1.36899000 | 1.45645100  | H | -0.83355000 | -1.09470500 | 2.00531500  |
| C            | 1.85466700  | 0.39529500  | 3.82719800  | C | -3.81526500 | 0.84304500  | 3.52580400  |
| H            | 0.82322900  | 1.00366100  | 2.03906900  | H | -4.34063700 | 1.33393300  | 1.50099800  |

|   |             |             |             |
|---|-------------|-------------|-------------|
| C | -2.92468700 | 0.17547100  | 4.36203800  |
| H | -1.14936800 | -1.04627600 | 4.45612300  |
| H | -4.64532900 | 1.40157700  | 3.94879900  |
| H | -3.05825400 | 0.21207200  | 5.43942700  |
| C | -3.27318900 | 1.37220600  | -0.89348600 |
| C | -4.61597900 | 1.25067700  | -1.26239200 |
| C | -2.64499600 | 2.61701000  | -1.01411300 |
| C | -5.31937800 | 2.35717800  | -1.73258300 |
| H | -5.11496900 | 0.28884800  | -1.18725400 |
| C | -3.35094600 | 3.72347200  | -1.47436400 |
| H | -1.59335700 | 2.70807100  | -0.75110300 |
| C | -4.69035700 | 3.59487800  | -1.83517800 |
| H | -6.36123300 | 2.25001100  | -2.02051300 |
| H | -2.85216800 | 4.68431500  | -1.56095400 |
| H | -5.24060300 | 4.45616700  | -2.20284000 |

### IntA1

|    |             |             |             |
|----|-------------|-------------|-------------|
| H  | -3.14810500 | -1.50498300 | -2.94448600 |
| H  | -3.14557200 | 0.05627000  | -2.34276100 |
| C  | -3.01847300 | -1.40323800 | -0.92850300 |
| C  | -2.83377400 | -2.78038100 | -0.74367600 |
| C  | -2.90020200 | -0.56602300 | 0.21751500  |
| C  | -2.57944700 | -3.32289300 | 0.51241500  |
| H  | -2.91925100 | -3.43309800 | -1.60878400 |
| C  | -2.62520800 | -1.12418500 | 1.48604300  |
| C  | -2.46743900 | -2.50563300 | 1.62960600  |
| H  | -2.62320000 | -0.48287600 | 2.36044500  |
| I  | -3.62869600 | 1.47912700  | 0.13506900  |
| H  | -2.46541000 | -4.39830900 | 0.61026900  |
| H  | -2.26980200 | -2.92259100 | 2.61118000  |
| Pd | -0.82047100 | -0.00360300 | 0.12854000  |
| P  | 1.45333400  | 0.10029100  | -0.00386700 |
| C  | 2.33117000  | 0.21342100  | 1.60691800  |
| C  | 3.51925000  | -0.46543500 | 1.89148200  |
| C  | 4.13996400  | -0.30950400 | 3.12893300  |
| C  | 3.58269000  | 0.52755100  | 4.09134800  |
| C  | 2.39602700  | 1.20418900  | 3.81724700  |
| C  | 1.77066400  | 1.04136100  | 2.58587600  |
| C  | 2.22646400  | 1.45594800  | -0.97628100 |
| C  | 3.47630300  | 2.00764200  | -0.67760500 |
| C  | 4.01134900  | 3.01435000  | -1.47750100 |
| C  | 3.30536800  | 3.47894000  | -2.58390100 |
| C  | 2.05672700  | 2.94021400  | -2.88505500 |
| C  | 1.51880500  | 1.94041600  | -2.08123900 |
| C  | 2.17315100  | -1.41197000 | -0.76615300 |

|   |             |             |             |
|---|-------------|-------------|-------------|
| C | 3.35605100  | -1.41343400 | -1.51171400 |
| C | 3.85360800  | -2.60143500 | -2.04171800 |
| C | 3.17594200  | -3.79931000 | -1.83102000 |
| C | 1.99367400  | -3.80576200 | -1.09443700 |
| C | 1.49097000  | -2.61874200 | -0.57154200 |
| H | 3.96060500  | -1.12345800 | 1.14866800  |
| H | 5.06033200  | -0.84614100 | 3.34049200  |
| H | 4.06747200  | 0.64696300  | 5.05590200  |
| H | 1.95168800  | 1.85211800  | 4.56706700  |
| H | 4.03230700  | 1.65528700  | 0.18640400  |
| H | 4.98103200  | 3.43821000  | -1.23290000 |
| H | 3.72342500  | 4.26558400  | -3.20526800 |
| H | 1.49636900  | 3.30683300  | -3.74009900 |
| H | 3.88884300  | -0.48295900 | -1.68586000 |
| H | 4.77126900  | -2.58926200 | -2.62271300 |
| H | 3.56453700  | -4.72468900 | -2.24643000 |
| H | 1.45558300  | -4.73553300 | -0.93408300 |
| H | 0.53401100  | 1.53354700  | -2.29956800 |
| H | 0.55566500  | -2.61846800 | -0.01534800 |
| H | 0.83295700  | 1.55130100  | 2.37732200  |
| N | -3.39486100 | -0.90752400 | -2.16787800 |

### TSA1

|    |             |             |             |
|----|-------------|-------------|-------------|
| H  | -3.33688200 | -1.23171200 | -2.99013300 |
| H  | -2.64591000 | 0.14437800  | -2.31755400 |
| C  | -3.38695000 | -1.18394200 | -0.96068700 |
| C  | -3.96922400 | -2.44954600 | -0.80144200 |
| C  | -2.92516400 | -0.53623400 | 0.21130500  |
| C  | -4.12756800 | -3.02458100 | 0.45350500  |
| H  | -4.31699700 | -2.97656000 | -1.68696000 |
| C  | -3.11936300 | -1.10344000 | 1.47865700  |
| C  | -3.70819100 | -2.35928300 | 1.60145900  |
| H  | -2.82533500 | -0.54524100 | 2.36130700  |
| I  | -2.79581500 | 1.85585000  | 0.14440200  |
| H  | -4.59338100 | -4.00249000 | 0.53132600  |
| H  | -3.84661600 | -2.80022900 | 2.58306200  |
| Pd | -0.90485800 | -0.15734900 | 0.14784000  |
| P  | 1.41800800  | -0.07873000 | 0.01946700  |
| C  | 2.31216200  | -0.82524200 | 1.43782100  |
| C  | 3.49651300  | -1.55518400 | 1.30204200  |
| C  | 4.13505400  | -2.07336800 | 2.42611400  |
| C  | 3.59864100  | -1.86514600 | 3.69379300  |
| C  | 2.41626700  | -1.14243600 | 3.83674100  |
| C  | 1.77320500  | -0.63152800 | 2.71430500  |
| C  | 2.18739900  | 1.58007200  | -0.13062700 |

|   |             |             |             |
|---|-------------|-------------|-------------|
| C | 3.47656500  | 1.86786700  | 0.32982700  |
| C | 4.01612200  | 3.13931700  | 0.15762500  |
| C | 3.27433700  | 4.13401100  | -0.47527400 |
| C | 1.98773300  | 3.85709700  | -0.92973200 |
| C | 1.44456700  | 2.58817800  | -0.75263000 |
| C | 2.08878600  | -0.99853500 | -1.42210200 |
| C | 3.17923000  | -0.56305500 | -2.17967900 |
| C | 3.64259500  | -1.32692300 | -3.24880000 |
| C | 3.02554900  | -2.53293000 | -3.56787900 |
| C | 1.93605300  | -2.97320400 | -2.81899400 |
| C | 1.46638900  | -2.20689200 | -1.75801400 |
| H | 3.91969500  | -1.72487500 | 0.31607100  |
| H | 5.05262800  | -2.64262500 | 2.30948400  |
| H | 4.09730200  | -2.27133200 | 4.56892700  |
| H | 1.98926200  | -0.98406400 | 4.82252800  |
| H | 4.05905800  | 1.09969500  | 0.83039400  |
| H | 5.01629800  | 3.35407500  | 0.52245200  |
| H | 3.69589600  | 5.12644300  | -0.60557600 |
| H | 1.39995100  | 4.63220800  | -1.41221100 |
| H | 3.66716000  | 0.37687600  | -1.93980300 |
| H | 4.48797200  | -0.97611600 | -3.83347900 |
| H | 3.38865700  | -3.12644800 | -4.40178300 |
| H | 1.44668000  | -3.91067700 | -3.06612300 |
| H | 0.43058200  | 2.37810700  | -1.08379300 |
| H | 0.60593600  | -2.54313000 | -1.18307900 |
| H | 0.84055100  | -0.08256500 | 2.82225800  |
| N | -3.33217400 | -0.58931300 | -2.21103900 |

**IntA2**

|    |             |             |             |
|----|-------------|-------------|-------------|
| H  | 1.90631700  | -2.48100800 | 2.89962800  |
| H  | 0.57854300  | -1.75566500 | 2.19070300  |
| C  | 2.07349200  | -2.22259300 | 0.88513600  |
| C  | 3.32425000  | -2.84067200 | 0.75985200  |
| C  | 1.38930600  | -1.86060500 | -0.28691400 |
| C  | 3.88954400  | -3.05967200 | -0.49080300 |
| H  | 3.86278100  | -3.13350400 | 1.65883300  |
| C  | 1.97381200  | -2.05764300 | -1.53461300 |
| C  | 3.22215000  | -2.66745100 | -1.64705400 |
| H  | 1.45525300  | -1.72809300 | -2.43168200 |
| I  | -3.19373700 | -1.57236700 | -0.15218500 |
| H  | 4.86459400  | -3.53355900 | -0.55816300 |
| H  | 3.66662500  | -2.82499300 | -2.62458900 |
| Pd | -0.52472900 | -1.31492200 | -0.23205700 |
| P  | 0.24675700  | 0.78335100  | 0.01957200  |
| C  | 0.03836200  | 1.36249700  | 1.73897500  |

|   |             |             |             |
|---|-------------|-------------|-------------|
| C | 0.90065700  | 2.30769700  | 2.30451800  |
| C | 0.67640400  | 2.77119000  | 3.59742600  |
| C | -0.40832500 | 2.29934200  | 4.33109100  |
| C | -1.27424700 | 1.36513600  | 3.76814200  |
| C | -1.05487400 | 0.89586100  | 2.47750600  |
| C | -0.76215900 | 1.91625600  | -0.99743600 |
| C | -0.82495700 | 3.27594300  | -0.67298300 |
| C | -1.54446200 | 4.15068100  | -1.47843300 |
| C | -2.20259200 | 3.67596300  | -2.61140300 |
| C | -2.14271700 | 2.32462900  | -2.93697900 |
| C | -1.42617600 | 1.44417800  | -2.13150800 |
| C | 1.96688000  | 1.17532400  | -0.44475100 |
| C | 2.24691300  | 1.78179500  | -1.67050200 |
| C | 3.56827100  | 1.97864100  | -2.06525600 |
| C | 4.61153500  | 1.57124000  | -1.24153700 |
| C | 4.33469900  | 0.96853100  | -0.01535200 |
| C | 3.02030900  | 0.76897900  | 0.38394600  |
| H | 1.75121400  | 2.67919300  | 1.74186100  |
| H | 1.35321400  | 3.50136800  | 4.03055000  |
| H | -0.57960200 | 2.66056100  | 5.34072500  |
| H | -2.12552300 | 0.99746700  | 4.33242200  |
| H | -0.32095800 | 3.65166600  | 0.21253900  |
| H | -1.59621000 | 5.20328200  | -1.21770900 |
| H | -2.76925400 | 4.36025100  | -3.23569900 |
| H | -2.66501600 | 1.94745000  | -3.81030800 |
| H | 1.43976500  | 2.09898900  | -2.32313900 |
| H | 3.77774800  | 2.44981100  | -3.02068800 |
| H | 5.64089100  | 1.71983100  | -1.55382500 |
| H | 5.14500500  | 0.64136700  | 0.62847200  |
| H | -1.40449400 | 0.38567600  | -2.37294000 |
| H | 2.80971500  | 0.28322200  | 1.33276100  |
| H | -1.74022000 | 0.17311800  | 2.04101400  |
| N | 1.58248400  | -1.88233500 | 2.15138000  |

**IntA3**

|    |             |             |             |
|----|-------------|-------------|-------------|
| Pd | -0.29116900 | -0.97634800 | -0.10947400 |
| P  | -1.54942200 | 0.97086500  | -0.01005500 |
| P  | 1.93061500  | 0.11088500  | 0.02442100  |
| C  | -0.57400200 | 4.23954900  | -2.36796300 |
| H  | -0.48536900 | 5.31720300  | -2.27035500 |
| C  | 2.30428600  | -1.09904900 | 2.52048700  |
| H  | 1.47047300  | -1.72843900 | 2.22675700  |
| C  | 3.87048700  | 0.66295600  | 2.02262800  |
| H  | 4.24005700  | 1.44055200  | 1.36073400  |
| C  | -0.60371000 | 1.23593800  | 2.59340800  |

|   |             |             |             |              |             |             |             |
|---|-------------|-------------|-------------|--------------|-------------|-------------|-------------|
| H | -0.12364200 | 0.28148600  | 2.40302900  | H            | 0.16715200  | 1.38500500  | 4.59089900  |
| C | 2.50468100  | -0.90219900 | -2.48695000 | C            | -0.74836600 | 1.47854500  | -2.58968100 |
| H | 1.42798600  | -0.85384300 | -2.62267300 | H            | -0.80868800 | 0.39591300  | -2.67420000 |
| C | -2.05334700 | 3.02322400  | 1.87394800  | C            | 2.63549800  | 3.84035400  | -1.61280200 |
| H | -2.72380400 | 3.45478400  | 1.13607100  | H            | 2.94304500  | 4.23486600  | -2.57658200 |
| C | -1.37936600 | 1.82825400  | 1.59464700  | C            | 1.84208100  | 2.80978200  | 0.83955400  |
| C | 4.44097100  | -0.66765300 | -1.07045800 | H            | 1.54879300  | 2.42312200  | 1.80922500  |
| H | 4.88884600  | -0.42243900 | -0.11298100 | C            | -0.33483200 | 3.62770600  | -3.59432800 |
| C | -1.89067400 | 3.64776000  | 3.10538600  | H            | -0.07252700 | 4.22786600  | -4.46053800 |
| H | -2.40927900 | 4.57956800  | 3.30991500  | C            | -5.50518800 | 0.25723100  | 0.68124100  |
| C | -4.00181600 | 1.38734700  | -1.37205500 | H            | -6.08482600 | -0.19830400 | 1.47796900  |
| H | -3.42547500 | 1.82515700  | -2.18043100 | C            | 1.96633700  | 4.18430200  | 0.67090200  |
| C | 2.50895900  | 2.46416200  | -1.44661600 | H            | 1.75268000  | 4.84568700  | 1.50546300  |
| H | 2.72653000  | 1.80641900  | -2.28151000 | C            | 2.36887200  | 4.70459400  | -0.55598400 |
| C | -3.36626600 | 0.92749800  | -0.21802500 | H            | 2.47315200  | 5.77773300  | -0.68772700 |
| C | 5.24935600  | -1.12215100 | -2.10823000 | C            | -2.07712700 | -1.94845800 | -0.22619700 |
| H | 6.31926800  | -1.22193700 | -1.95153400 | C            | -2.66697200 | -2.48588200 | 0.92688700  |
| C | 2.11778500  | 1.93126400  | -0.21548500 | C            | -2.74867000 | -2.04283900 | -1.43959900 |
| C | 4.68954900  | -1.45381400 | -3.33876400 | C            | -3.92839800 | -3.08196300 | 0.83655200  |
| H | 5.32247200  | -1.81094000 | -4.14575200 | C            | -4.01157800 | -2.63010600 | -1.52634800 |
| C | -0.91174600 | 3.47698200  | -1.25373500 | H            | -2.29458100 | -1.63643600 | -2.34050100 |
| H | -1.06787600 | 3.96987200  | -0.30118000 | C            | -4.60274200 | -3.14324900 | -0.37845000 |
| C | -6.13722600 | 0.71516800  | -0.47296600 | H            | -4.38664600 | -3.49698300 | 1.73291000  |
| H | -7.21474500 | 0.62542900  | -0.57494100 | H            | -4.52486500 | -2.67869200 | -2.48217000 |
| C | -4.12744700 | 0.36500700  | 0.81244200  | H            | -5.58677500 | -3.60131200 | -0.42448300 |
| H | -3.63800500 | -0.00821400 | 1.70776400  | N            | -2.02295700 | -2.35817100 | 2.17635900  |
| C | 2.90903800  | -1.28472300 | 3.76081800  | H            | -2.40984200 | -2.99163200 | 2.86735800  |
| H | 2.52996100  | -2.04886300 | 4.43253300  | H            | -1.02799800 | -2.54442700 | 2.08411900  |
| C | -1.01131400 | 2.08977500  | -1.35721800 | I            | 0.84044100  | -3.44530800 | -0.19868500 |
| C | -1.07830800 | 3.07056700  | 4.08082500  |              |             |             |             |
| H | -0.95582200 | 3.55936000  | 5.04286700  | <b>IntA4</b> |             |             |             |
| C | 2.77684000  | -0.12413100 | 1.63755600  | Pd           | 0.02283000  | -0.07703100 | -0.43190800 |
| C | -5.38527100 | 1.28291600  | -1.49524500 | P            | -2.29665100 | -0.06597200 | -0.03943400 |
| H | -5.87200800 | 1.64318100  | -2.39672400 | P            | 2.34787100  | 0.03431500  | -0.01805600 |
| C | 3.06247800  | -0.54951400 | -1.25429500 | C            | -3.83802400 | -2.81014100 | 2.63269700  |
| C | -0.41719800 | 2.24209600  | -3.70335500 | H            | -4.69286800 | -3.47616700 | 2.70176000  |
| H | -0.22004500 | 1.75362800  | -4.65282200 | C            | 3.30541300  | -1.65697800 | -2.00556800 |
| C | 4.47735700  | 0.47333900  | 3.25931100  | H            | 2.42835900  | -1.33652900 | -2.55948500 |
| H | 5.32465000  | 1.09053600  | 3.54295600  | C            | 4.60349000  | -1.66641700 | 0.02888600  |
| C | 3.99581300  | -0.49977900 | 4.13241800  | H            | 4.75833200  | -1.33680500 | 1.05231400  |
| H | 4.46786100  | -0.64429000 | 5.09981500  | C            | -2.92949500 | -1.22107800 | -2.51383300 |
| C | 3.31462300  | -1.34274100 | -3.52752200 | H            | -1.86573700 | -1.41635900 | -2.59794400 |
| H | 2.86831500  | -1.62034800 | -4.47747900 | C            | 3.03395900  | 2.35638800  | -1.39499200 |
| C | -0.44765500 | 1.85593700  | 3.82997500  | H            | 2.20173200  | 2.09852200  | -2.04026200 |
|   |             |             |             | C            | -4.80592500 | -0.35136700 | -1.26691500 |

|   |             |             |             |
|---|-------------|-------------|-------------|
| H | -5.20204000 | 0.16135800  | -0.39489200 |
| C | -3.42978000 | -0.59382900 | -1.37149100 |
| C | 4.41024400  | 1.89521800  | 0.52849100  |
| H | 4.66049300  | 1.27751400  | 1.38598000  |
| C | -5.66734600 | -0.75121100 | -2.28187300 |
| H | -6.73268300 | -0.56168100 | -2.19075500 |
| C | -3.37372700 | 1.79032100  | 1.81413100  |
| H | -3.25571700 | 1.02421500  | 2.57343700  |
| C | 2.27400900  | 0.83935800  | 2.68656400  |
| H | 2.38270400  | 1.85574700  | 2.32174100  |
| C | -3.03971700 | 1.52369400  | 0.48637100  |
| C | 5.17645900  | 3.02135000  | 0.24973200  |
| H | 6.01509000  | 3.27436900  | 0.89150300  |
| C | 2.32371000  | -0.23634000 | 1.79277300  |
| C | 4.87027100  | 3.81980900  | -0.84995900 |
| H | 5.46604300  | 4.70224900  | -1.06380900 |
| C | -3.67698900 | -2.01277600 | 1.50217900  |
| H | -4.40353400 | -2.06903200 | 0.69801800  |
| C | -4.00795400 | 4.04049700  | 1.21577200  |
| H | -4.37695600 | 5.02159200  | 1.50034900  |
| C | -3.20416400 | 2.52473900  | -0.47822900 |
| H | -2.93562100 | 2.33031700  | -1.51308100 |
| C | 4.21682500  | -2.52962600 | -2.59049300 |
| H | 4.05619500  | -2.87297700 | -3.60768900 |
| C | -2.57445400 | -1.16562200 | 1.39546100  |
| C | -5.16173200 | -1.38477700 | -3.41553200 |
| H | -5.83478600 | -1.69362400 | -4.21010300 |
| C | 3.49446700  | -1.21857800 | -0.69381100 |
| C | -3.85845300 | 3.04624500  | 2.17523300  |
| H | -4.11612200 | 3.24355700  | 3.21171600  |
| C | 3.32040000  | 1.56304300  | -0.28331000 |
| C | -1.80097100 | -1.91835200 | 3.56135700  |
| H | -1.05765900 | -1.88284700 | 4.35192800  |
| C | 5.50780300  | -2.54785400 | -0.55405200 |
| H | 6.36224500  | -2.89901100 | 0.01677300  |
| C | 5.31670000  | -2.97799500 | -1.86482000 |
| H | 6.02222400  | -3.66814900 | -2.31794200 |
| C | 3.80286900  | 3.48148100  | -1.67535300 |
| H | 3.55907400  | 4.09820900  | -2.53491000 |
| C | -3.79471700 | -1.61545100 | -3.53088400 |
| H | -3.39529900 | -2.10620500 | -4.41305300 |
| C | -1.63101500 | -1.13105900 | 2.42975500  |
| H | -0.74882200 | -0.50015400 | 2.34548400  |
| C | 2.07468800  | 0.61458200  | 4.04620700  |

|   |             |             |             |
|---|-------------|-------------|-------------|
| H | 2.03755000  | 1.45816400  | 4.72899200  |
| C | 2.16582500  | -1.53920300 | 2.28175500  |
| H | 2.16588200  | -2.38054600 | 1.59535000  |
| C | -2.90557300 | -2.76120800 | 3.66401200  |
| H | -3.03320400 | -3.38698600 | 4.54247400  |
| C | -3.68146900 | 3.77569300  | -0.11333300 |
| H | -3.78658000 | 4.54990500  | -0.86695400 |
| C | 1.97253700  | -1.75837000 | 3.64123800  |
| H | 1.84811200  | -2.77378000 | 4.00482000  |
| C | 1.92370000  | -0.68337200 | 4.52640100  |
| H | 1.76873200  | -0.85685900 | 5.58740600  |
| C | -0.05002400 | 1.95260900  | -0.33966200 |
| C | -0.18954100 | 2.68311100  | -1.53097800 |
| C | 0.00168100  | 2.64372400  | 0.86662100  |
| C | -0.20864500 | 4.08120100  | -1.48710700 |
| C | -0.03070900 | 4.03761400  | 0.91387600  |
| H | 0.05315500  | 2.08625500  | 1.79851100  |
| C | -0.12374800 | 4.75407900  | -0.27357400 |
| H | -0.31024700 | 4.64171600  | -2.41478900 |
| H | 0.00900700  | 4.55224900  | 1.86926700  |
| H | -0.14526600 | 5.84014200  | -0.26008900 |
| N | -0.37387700 | 2.02372100  | -2.75678400 |
| H | -0.05313200 | 2.53214300  | -3.57023100 |
| H | -0.05589000 | 1.06146000  | -2.75829100 |
| I | 0.04039000  | -2.83431400 | -0.74298900 |

### IntA5

|    |             |             |             |
|----|-------------|-------------|-------------|
| Pd | 0.24537000  | -1.42633200 | -0.16433100 |
| P  | -0.04467000 | 0.91603300  | 0.01523900  |
| C  | 0.99196300  | 0.82379700  | 2.60638800  |
| H  | 1.48676300  | -0.08583300 | 2.27891400  |
| C  | -0.44084500 | 2.71377000  | 2.14818100  |
| H  | -1.08859500 | 3.26594100  | 1.47397200  |
| C  | 1.54135000  | 1.29741500  | -2.23724900 |
| H  | 1.23225600  | 0.29076000  | -2.50445700 |
| C  | 1.56457100  | 3.13148000  | -0.66711600 |
| H  | 1.26376100  | 3.56891300  | 0.27971100  |
| C  | -1.86883800 | 2.09788000  | -1.77082600 |
| H  | -1.02346900 | 2.24739700  | -2.43491900 |
| C  | 2.40286700  | 3.84405800  | -1.51880800 |
| H  | 2.74734000  | 4.83254400  | -1.23062400 |
| C  | -1.68095900 | 1.54498000  | -0.50286100 |
| C  | 2.80259300  | 3.29005100  | -2.73185400 |
| H  | 3.45960800  | 3.84715400  | -3.39301100 |
| C  | 1.19628400  | 1.29705000  | 3.89883600  |



|   |             |             |             |
|---|-------------|-------------|-------------|
| H | 1.83811800  | 0.74249900  | 4.57631400  |
| C | 0.17198200  | 1.52947800  | 1.72138400  |
| C | 1.12737700  | 1.85403000  | -1.02378200 |
| C | -0.23455800 | 3.18212900  | 3.44144500  |
| H | -0.71605500 | 4.10033100  | 3.76389800  |
| C | 0.58310800  | 2.47380300  | 4.31862400  |
| H | 0.74143700  | 2.83971700  | 5.32875400  |
| C | 2.37003900  | 2.01639000  | -3.09139500 |
| H | 2.69192500  | 1.57286000  | -4.02827700 |
| C | -3.14535700 | 2.46166200  | -2.19272000 |
| H | -3.28117200 | 2.89160300  | -3.18053600 |
| C | -2.78329100 | 1.36562300  | 0.34080300  |
| H | -2.64913200 | 0.92795600  | 1.32571500  |
| C | -4.05405100 | 1.72810000  | -0.08577900 |
| H | -4.90356300 | 1.57013600  | 0.57108300  |
| C | -4.23860800 | 2.27399600  | -1.35433200 |
| H | -5.23430200 | 2.55136200  | -1.68753000 |
| C | -1.79111300 | -1.60322400 | -0.24638900 |
| C | -2.54401200 | -1.74007700 | 0.92860400  |
| C | -2.42987800 | -1.60948400 | -1.48215600 |
| C | -3.93292100 | -1.89701600 | 0.82781300  |
| C | -3.81411100 | -1.74655600 | -1.57622300 |
| H | -1.84477300 | -1.49242400 | -2.39109900 |
| C | -4.55999800 | -1.89870000 | -0.41175300 |
| H | -4.52285700 | -1.99762600 | 1.73667000  |
| H | -4.29855400 | -1.73797800 | -2.54753000 |
| H | -5.63872100 | -2.01530600 | -0.46428600 |
| N | -1.94937400 | -1.61081400 | 2.19032500  |
| H | -2.42636500 | -2.10091000 | 2.93529600  |
| H | -0.95300500 | -1.78996900 | 2.20389800  |
| I | 2.98947200  | -1.41606900 | -0.03180600 |
| C | 0.29698300  | -3.38289900 | -0.30433000 |
| O | 0.31531700  | -4.51467900 | -0.39186100 |

**TSA2**

|    |             |             |             |
|----|-------------|-------------|-------------|
| Pd | -0.15132200 | -1.38058500 | -0.15897000 |
| P  | 0.38147600  | 0.97252500  | 0.01869100  |
| C  | 1.63464100  | 0.68160000  | 2.48048300  |
| H  | 1.91005900  | -0.30038500 | 2.10455400  |
| C  | 0.52079100  | 2.80477600  | 2.18054500  |
| H  | -0.08592600 | 3.47629000  | 1.58004000  |
| C  | 2.03283300  | 0.84309200  | -2.21551300 |
| H  | 1.57909900  | -0.13136600 | -2.37056600 |
| C  | 2.30493300  | 2.83623400  | -0.87898500 |
| H  | 2.05268700  | 3.42695200  | -0.00316900 |

|   |             |             |             |
|---|-------------|-------------|-------------|
| C | -1.18205200 | 2.68278100  | -1.60555200 |
| H | -0.34162900 | 2.70362500  | -2.29260100 |
| C | 3.25334300  | 3.30844200  | -1.77880700 |
| H | 3.73428300  | 4.26593600  | -1.60274100 |
| C | -1.08412500 | 1.98650800  | -0.39920100 |
| C | 3.58951900  | 2.55198300  | -2.90030800 |
| H | 4.33406300  | 2.92069000  | -3.59972200 |
| C | 2.05841900  | 1.08701400  | 3.74269600  |
| H | 2.65859000  | 0.41404000  | 4.34736600  |
| C | 0.86448900  | 1.54028600  | 1.68905500  |
| C | 1.68570400  | 1.60047700  | -1.09413800 |
| C | 0.94317300  | 3.20344300  | 3.44494900  |
| H | 0.66952100  | 4.18556100  | 3.81904100  |
| C | 1.71252800  | 2.34550700  | 4.22715800  |
| H | 2.04071400  | 2.65794500  | 5.21418600  |
| C | 2.97975900  | 1.32051000  | -3.11780000 |
| H | 3.24916500  | 0.72082700  | -3.98156300 |
| C | -2.35695500 | 3.35617600  | -1.93307900 |
| H | -2.42158000 | 3.89542500  | -2.87351300 |
| C | -2.17967400 | 1.96970100  | 0.47193300  |
| H | -2.11966400 | 1.42079300  | 1.40816900  |
| C | -3.34642800 | 2.64911500  | 0.14571400  |
| H | -4.18938200 | 2.62594100  | 0.82951500  |
| C | -3.43910100 | 3.34232000  | -1.05943900 |
| H | -4.35353900 | 3.86905600  | -1.31596600 |
| C | -2.28409400 | -1.37605700 | -0.25854900 |
| C | -3.01696300 | -1.24015800 | 0.94131900  |
| C | -2.86441000 | -1.00143500 | -1.48167800 |
| C | -4.34231700 | -0.77764900 | 0.86581300  |
| C | -4.15504500 | -0.50753300 | -1.53641700 |
| H | -2.28907500 | -1.12276400 | -2.39497600 |
| C | -4.89269000 | -0.41695800 | -0.35142700 |
| H | -4.92218300 | -0.67813600 | 1.77993100  |
| H | -4.59184900 | -0.21057200 | -2.48339700 |
| H | -5.91539000 | -0.05203000 | -0.38034500 |
| N | -2.44592800 | -1.49995900 | 2.16717100  |
| H | -3.05824600 | -1.78059800 | 2.91824100  |
| H | -1.53367800 | -1.93598900 | 2.18039700  |
| I | 2.31128500  | -2.46216800 | -0.05226500 |
| C | -1.27840400 | -2.89789900 | -0.34276800 |
| O | -1.68640100 | -3.97640900 | -0.45834800 |

**IntA6**

|    |             |             |             |
|----|-------------|-------------|-------------|
| Pd | 1.14423200  | -0.73905800 | -0.13115400 |
| P  | -1.18348900 | -0.50514300 | 0.06499400  |

|   |             |             |             |
|---|-------------|-------------|-------------|
| C | -3.52109000 | 0.10916400  | 3.39298500  |
| H | -4.54525200 | -0.08197500 | 3.69879800  |
| C | -1.39374700 | -3.27306400 | 0.07994000  |
| H | -0.41145200 | -3.24174000 | 0.54678700  |
| C | -3.28431400 | -2.14644700 | -0.91330100 |
| H | -3.78199500 | -1.23330000 | -1.22645700 |
| C | -2.02879700 | -2.08589100 | -0.30053000 |
| C | -3.89500200 | -3.37735000 | -1.13595700 |
| H | -4.86815000 | -3.41583300 | -1.61608800 |
| C | -2.63241100 | 1.83873500  | -0.58587600 |
| H | -2.73750300 | 2.00754900  | 0.48091800  |
| C | -1.97076100 | 0.70331300  | -1.05554600 |
| C | -3.09118600 | -0.28730800 | 2.13223400  |
| H | -3.78192200 | -0.78864000 | 1.46026500  |
| C | -3.00204500 | 2.57343300  | -2.85512300 |
| H | -3.40160400 | 3.30160600  | -3.55470400 |
| C | -1.81935600 | 0.51405100  | -2.43522700 |
| H | -1.28272700 | -0.35353600 | -2.80932400 |
| C | -1.77063100 | -0.04886300 | 1.73314100  |
| C | -3.25938500 | -4.55416600 | -0.74910900 |
| H | -3.73607800 | -5.51320400 | -0.92791000 |
| C | -3.14565600 | 2.77004500  | -1.48575300 |
| H | -3.65316100 | 3.65364300  | -1.11102000 |
| C | -1.32275900 | 0.97926300  | 3.87248800  |
| H | -0.62948100 | 1.46688200  | 4.55107600  |
| C | -2.00803000 | -4.50116700 | -0.14015800 |
| H | -1.50405200 | -5.41582400 | 0.15572500  |
| C | -0.88507400 | 0.58110000  | 2.61119100  |
| H | 0.14691700  | 0.75492100  | 2.31370800  |
| C | -2.63705000 | 0.74535200  | 4.26365500  |
| H | -2.97425200 | 1.05179300  | 5.24948900  |
| C | -2.33839300 | 1.44224900  | -3.32948600 |
| H | -2.21570200 | 1.28712800  | -4.39684700 |
| I | 3.72984600  | -1.38485300 | -0.01416200 |
| C | 1.27775000  | 0.89480900  | -1.22277000 |
| O | 1.35676200  | 0.69778600  | -2.39694100 |
| C | 1.12282500  | 2.21869900  | -0.57378300 |
| C | 1.54121600  | 2.56301500  | 0.73226800  |
| C | 0.44423300  | 3.16458800  | -1.36327200 |
| C | 1.21933200  | 3.85083400  | 1.20142000  |
| C | 0.13424100  | 4.42069400  | -0.88024000 |
| C | 0.52725100  | 4.75530500  | 0.41768100  |
| H | 1.52910700  | 4.12913800  | 2.20551000  |
| H | -0.40992800 | 5.12624300  | -1.49840100 |

|   |            |            |             |
|---|------------|------------|-------------|
| H | 0.29513900 | 5.73654200 | 0.82171100  |
| H | 0.13735000 | 2.86729500 | -2.36035700 |
| N | 2.20389600 | 1.69810200 | 1.57423000  |
| H | 2.72777100 | 0.93083600 | 1.16608700  |
| H | 2.68450100 | 2.13016100 | 2.35048500  |

### IntA7

|    |             |             |             |
|----|-------------|-------------|-------------|
| Pd | 0.22039900  | -0.75277800 | -0.51755300 |
| P  | 1.27191900  | 1.29367300  | -0.11906700 |
| P  | -2.08346300 | -0.08235700 | 0.12635700  |
| C  | 0.32697600  | 3.54399400  | 3.22746600  |
| H  | 0.05302800  | 4.56658800  | 3.46812500  |
| C  | -2.85664600 | -0.58613200 | -2.51020900 |
| H  | -1.87535100 | -1.04121400 | -2.60897000 |
| C  | -4.53141500 | 0.51722100  | -1.16813000 |
| H  | -4.84752400 | 0.95455800  | -0.22519800 |
| C  | -0.18255200 | 2.22394200  | -2.30452300 |
| H  | -0.55965800 | 1.20634200  | -2.35443600 |
| C  | -1.88294200 | -1.69268400 | 2.36181500  |
| H  | -0.86276600 | -1.31755900 | 2.38822400  |
| C  | 1.25123400  | 3.87347700  | -1.28544000 |
| H  | 2.01253700  | 4.14153000  | -0.55820600 |
| C  | 0.73253000  | 2.57249400  | -1.30833800 |
| C  | -4.03839900 | -1.80308500 | 1.28729800  |
| H  | -4.71026300 | -1.51888700 | 0.48393600  |
| C  | 0.81421900  | 4.81956700  | -2.20541000 |
| H  | 1.21586100  | 5.82788100  | -2.17392900 |
| C  | 3.91068500  | 1.26797300  | 0.90449300  |
| H  | 3.46724300  | 1.12983600  | 1.88498500  |
| C  | -2.65251400 | 1.65560500  | 2.30547000  |
| H  | -2.62257300 | 0.77624500  | 2.94000800  |
| C  | 3.09932800  | 1.42315300  | -0.22186900 |
| C  | -4.46706700 | -2.70927300 | 2.25410000  |
| H  | -5.47173100 | -3.11759000 | 2.19869400  |
| C  | -2.44729500 | 1.53703200  | 0.92900500  |
| C  | -3.61241400 | -3.09609000 | 3.28137700  |
| H  | -3.94954900 | -3.80427500 | 4.03246500  |
| C  | 0.55718900  | 3.19160600  | 1.90093400  |
| H  | 0.44186800  | 3.94087600  | 1.12621800  |
| C  | 5.88361400  | 1.45824900  | -0.47118400 |
| H  | 6.96523300  | 1.46954900  | -0.56753800 |
| C  | 3.69537600  | 1.58102900  | -1.47782900 |
| H  | 3.07879600  | 1.67581400  | -2.36624400 |
| C  | -3.71785200 | -0.55515000 | -3.60462300 |
| H  | -3.39458100 | -0.97659600 | -4.55143800 |

|   |             |             |             |               |             |             |             |
|---|-------------|-------------|-------------|---------------|-------------|-------------|-------------|
| C | 0.89150900  | 1.87728100  | 1.57365600  | N             | 1.76365100  | -2.30649400 | 1.65991600  |
| C | -0.12529900 | 4.47039800  | -3.17496700 | H             | 0.99295300  | -2.63690800 | 1.08341700  |
| H | -0.46147500 | 5.21014900  | -3.89546800 | H             | 1.81635800  | -2.85408600 | 2.51051800  |
| C | -3.25618900 | -0.05277800 | -1.28142900 | <b>IntA10</b> |             |             |             |
| C | 5.29603600  | 1.28465700  | 0.77775000  | Pd            | 0.19606600  | -0.83102900 | -0.66838300 |
| H | 5.91536900  | 1.15544300  | 1.65992700  | P             | 1.33584500  | 1.07176600  | -0.05309600 |
| C | -2.74511900 | -1.28396600 | 1.33781400  | P             | -2.09198900 | -0.09014600 | 0.04971300  |
| C | 0.74246200  | 1.27434500  | 3.91358000  | C             | 0.56205000  | 2.88742900  | 3.59093000  |
| H | 0.80885800  | 0.52089400  | 4.69314700  | H             | 0.34619200  | 3.87979100  | 3.97478900  |
| C | -5.39111800 | 0.54247800  | -2.26024000 | C             | -2.86892100 | -0.35931600 | -2.60691700 |
| H | -6.37777100 | 0.98497900  | -2.15965000 | H             | -2.02873800 | -1.04634600 | -2.66225600 |
| C | -4.98432500 | 0.00680100  | -3.48121200 | C             | -4.30230600 | 1.08914900  | -1.30973300 |
| H | -5.65550200 | 0.02994400  | -4.33483900 | H             | -4.56139500 | 1.56805600  | -0.37042300 |
| C | -2.31809300 | -2.58385700 | 3.33525400  | C             | -0.18325000 | 2.32059100  | -2.03512000 |
| H | -1.64159500 | -2.89254000 | 4.12694100  | H             | -0.58468300 | 1.32787900  | -2.21470100 |
| C | -0.61339300 | 3.16895500  | -3.23235700 | C             | -2.08592500 | -2.31119000 | 1.70908300  |
| H | -1.32835000 | 2.88147500  | -3.99709900 | H             | -1.01803200 | -2.12157500 | 1.77342700  |
| C | 0.96876500  | 0.91461400  | 2.58888800  | C             | 1.33598000  | 3.78415100  | -0.86835300 |
| H | 1.21150800  | -0.11802100 | 2.33710700  | H             | 2.13832300  | 3.93412800  | -0.15133600 |
| C | -2.90656100 | 2.89987900  | 2.87657800  | C             | 0.78331000  | 2.50891100  | -1.04374300 |
| H | -3.06586200 | 2.97178200  | 3.94836400  | C             | -4.25639800 | -1.76623200 | 0.80393200  |
| C | -2.49026300 | 2.69376300  | 0.14041100  | H             | -4.88886800 | -1.14305400 | 0.17891400  |
| H | -2.34753600 | 2.62723400  | -0.93279400 | C             | 0.88013700  | 4.85774900  | -1.62481000 |
| C | 0.42594600  | 2.59113700  | 4.23628600  | H             | 1.30932300  | 5.84378200  | -1.47437000 |
| H | 0.24363300  | 2.87130500  | 5.26968800  | C             | 4.01076400  | 0.94256600  | 0.86155300  |
| C | 5.08017200  | 1.60411900  | -1.59872000 | H             | 3.60423600  | 0.71808400  | 1.84230500  |
| H | 5.53040200  | 1.72925600  | -2.57887700 | C             | -2.60798700 | 1.15494200  | 2.53238900  |
| C | -2.73860000 | 3.93568600  | 0.71289700  | H             | -2.64496800 | 0.15221600  | 2.94626900  |
| H | -2.77049400 | 4.81859300  | 0.08116500  | C             | 3.15729400  | 1.18546200  | -0.21583800 |
| C | -2.95240600 | 4.04236300  | 2.08489400  | C             | -4.80574200 | -2.85387600 | 1.47484400  |
| H | -3.15328900 | 5.01094100  | 2.53364100  | H             | -5.86562900 | -3.06884100 | 1.37539400  |
| I | -0.55899900 | -3.35887200 | -0.99549700 | C             | -2.39140500 | 1.33958700  | 1.16444400  |
| C | 2.00261900  | -1.37331200 | -1.23992700 | C             | -3.99712000 | -3.67116800 | 2.26271500  |
| O | 2.15245200  | -1.20730300 | -2.42667400 | H             | -4.42597900 | -4.52736500 | 2.77506800  |
| C | 3.11196700  | -1.86376200 | -0.36278300 | C             | 0.76021600  | 2.71000700  | 2.22511900  |
| C | 2.98790900  | -2.23939900 | 0.99294300  | H             | 0.68033900  | 3.56535400  | 1.56438000  |
| C | 4.38733700  | -1.83483600 | -0.94632500 | C             | 5.92713200  | 1.26562200  | -0.56927000 |
| C | 4.15857700  | -2.52139200 | 1.71557600  | H             | 7.00412200  | 1.29620300  | -0.70537500 |
| C | 5.53170500  | -2.12356300 | -0.22521700 | C             | 3.70154700  | 1.45004200  | -1.47752300 |
| C | 5.40822900  | -2.45814900 | 1.12267900  | H             | 3.04806300  | 1.61729600  | -2.32888000 |
| H | 4.07053200  | -2.80493400 | 2.76207700  | C             | -3.65481500 | -0.11970400 | -3.73085300 |
| H | 6.50683900  | -2.07460200 | -0.69865100 | H             | -3.40044900 | -0.59853000 | -4.67173300 |
| H | 6.29093100  | -2.68202100 | 1.71539900  | C             | 1.01751300  | 1.43727800  | 1.71340000  |
| H | 4.44696900  | -1.54614200 | -1.98988400 | C             | -0.11451100 | 4.66641400  | -2.58341000 |

|   |             |             |             |
|---|-------------|-------------|-------------|
| H | -0.46702900 | 5.50668700  | -3.17426600 |
| C | -3.18226700 | 0.25300200  | -1.38647000 |
| C | 5.39019900  | 0.98185200  | 0.68210900  |
| H | 6.04487000  | 0.78404000  | 1.52520300  |
| C | -2.89116500 | -1.48756600 | 0.91728300  |
| C | 0.86123700  | 0.52643100  | 3.95034600  |
| H | 0.89359500  | -0.33031200 | 4.61728900  |
| C | -5.08479900 | 1.32396200  | -2.43649700 |
| H | -5.94956600 | 1.97712200  | -2.36408200 |
| C | -4.75863600 | 0.72502500  | -3.65066100 |
| H | -5.36704200 | 0.91300100  | -4.53067700 |
| C | -2.63778800 | -3.39847200 | 2.37967800  |
| H | -1.99749700 | -4.04617300 | 2.96969300  |
| C | -0.63557600 | 3.39455000  | -2.79806200 |
| H | -1.39378000 | 3.22821000  | -3.55713100 |
| C | 1.05023100  | 0.34052800  | 2.58441800  |
| H | 1.22270200  | -0.65961800 | 2.18618300  |
| C | -2.78705800 | 2.24995100  | 3.37315100  |
| H | -2.95475700 | 2.08729000  | 4.43360800  |
| C | -2.33573000 | 2.64608600  | 0.66128100  |
| H | -2.16261600 | 2.81711700  | -0.39619000 |
| C | 0.62093300  | 1.80021400  | 4.45712400  |
| H | 0.46494900  | 1.94416900  | 5.52236400  |
| C | 5.07994900  | 1.49575400  | -1.65008200 |
| H | 5.49138100  | 1.70587900  | -2.63276600 |
| C | -2.52271200 | 3.73758300  | 1.50169700  |
| H | -2.48664600 | 4.74174100  | 1.08926500  |
| C | -2.75330500 | 3.54275600  | 2.86095500  |
| H | -2.90094500 | 4.39478200  | 3.51826300  |
| C | 1.87885000  | -1.54818700 | -1.50461400 |
| O | 1.92593500  | -1.45175500 | -2.70800400 |
| C | 3.02787200  | -2.06771700 | -0.70376500 |
| C | 2.94622400  | -2.51863400 | 0.63206900  |
| C | 4.28345200  | -1.97592300 | -1.32220800 |
| C | 4.14561500  | -2.79313900 | 1.31256500  |
| C | 5.45431500  | -2.26406100 | -0.64384400 |
| C | 5.37564500  | -2.66217300 | 0.69107100  |
| H | 4.09346000  | -3.13451200 | 2.34420800  |
| H | 6.41535300  | -2.16155200 | -1.13721600 |
| H | 6.28110800  | -2.88356900 | 1.24982100  |
| H | 4.30844200  | -1.63544100 | -2.35185500 |
| N | 1.73214700  | -2.67750000 | 1.28687200  |
| H | 0.98764000  | -3.10905900 | 0.71337200  |
| H | 1.83237300  | -3.19756800 | 2.15114600  |

|   |             |             |             |
|---|-------------|-------------|-------------|
| O | -0.89087300 | -2.47447200 | -1.47651300 |
| C | -0.96116300 | -3.64488500 | -0.95796500 |
| O | -0.21869400 | -4.09910600 | -0.07620500 |
| C | -2.12182700 | -4.48505100 | -1.46288900 |
| H | -2.30836600 | -4.30145300 | -2.52360100 |
| H | -1.93550500 | -5.54546200 | -1.28339100 |
| H | -3.01718900 | -4.18599600 | -0.90381500 |

### IntA13

|    |             |             |             |
|----|-------------|-------------|-------------|
| Pd | 0.64081700  | 0.63552700  | 0.05875800  |
| P  | 1.06266700  | -1.63461100 | 0.17326700  |
| P  | -1.84327400 | 0.55485200  | -0.06854500 |
| C  | -1.41880900 | -4.36620000 | -1.72263000 |
| H  | -1.98026000 | -5.25900900 | -1.46413500 |
| C  | -1.58951700 | 2.05120100  | 2.29526500  |
| H  | -0.54382600 | 2.13954700  | 2.01556500  |
| C  | -3.79972800 | 1.18177800  | 1.90284500  |
| H  | -4.48980200 | 0.58182400  | 1.31672900  |
| C  | 0.19612500  | -1.55467300 | 2.80688600  |
| H  | 0.04462000  | -0.49778600 | 2.60366600  |
| C  | -1.65766600 | 1.84543100  | -2.50392400 |
| H  | -0.66507000 | 1.39383500  | -2.54321500 |
| C  | 0.92436600  | -3.73502800 | 2.08245300  |
| H  | 1.34182900  | -4.38824000 | 1.32156800  |
| C  | 0.71726700  | -2.37730100 | 1.80389400  |
| C  | -3.75567700 | 2.23301100  | -1.36190400 |
| H  | -4.40865200 | 2.08350600  | -0.50777000 |
| C  | 0.59938700  | -4.25704300 | 3.32997800  |
| H  | 0.76365600  | -5.31122700 | 3.53176600  |
| C  | 3.25593900  | -1.62411700 | -1.51125300 |
| H  | 2.62615100  | -1.00389500 | -2.14530900 |
| C  | -3.52893000 | -1.33517300 | -1.32584900 |
| H  | -3.46480700 | -0.70894000 | -2.21027700 |
| C  | 2.78425100  | -2.07713200 | -0.27306800 |
| C  | -4.17753500 | 3.04005200  | -2.41139800 |
| H  | -5.15689000 | 3.50800800  | -2.37199000 |
| C  | -2.86100900 | -0.96548100 | -0.15780200 |
| C  | -3.34204700 | 3.25449300  | -3.50807900 |
| H  | -3.67159400 | 3.89288400  | -4.32288400 |
| C  | -0.68526100 | -3.71145000 | -0.73784700 |
| H  | -0.70583800 | -4.09991300 | 0.27332600  |
| C  | 5.40147000  | -2.64213800 | -1.07347100 |
| H  | 6.41812700  | -2.86397200 | -1.38505100 |
| C  | 3.64260700  | -2.77974900 | 0.57296600  |
| H  | 3.31716500  | -3.08354300 | 1.56133600  |

|   |             |             |             |             |             |             |             |
|---|-------------|-------------|-------------|-------------|-------------|-------------|-------------|
| C | -2.03537000 | 2.65723300  | 3.46744400  | H           | 4.26202300  | 2.37476300  | 2.44885300  |
| H | -1.33689200 | 3.22273200  | 4.07695600  | N           | 0.61962200  | 2.78235900  | -0.22919000 |
| C | 0.03539900  | -2.55474600 | -1.04477200 | H           | -0.27311700 | 3.27146700  | -0.20793600 |
| C | 0.06650800  | -3.42976600 | 4.31659100  | O           | 1.83772600  | 2.87350600  | -2.59121300 |
| H | -0.18754500 | -3.83950100 | 5.28973000  | H           | 0.99428800  | 2.83267200  | -1.23551500 |
| C | -2.46676300 | 1.31481800  | 1.49137800  | C           | 2.02350600  | 1.69059900  | -2.97416900 |
| C | 4.55609000  | -1.91437800 | -1.90788600 | C           | 3.22448900  | 1.41635100  | -3.87410700 |
| H | 4.91125900  | -1.55738400 | -2.87032700 | H           | 4.04471200  | 1.04597100  | -3.24654400 |
| C | -2.49223500 | 1.62976400  | -1.40162300 | H           | 2.98773600  | 0.63997500  | -4.60715300 |
| C | -0.75843900 | -2.70192900 | -3.32603200 | H           | 3.55876500  | 2.32715100  | -4.37526300 |
| H | -0.79137300 | -2.29215100 | -4.33131000 | O           | 1.31483500  | 0.69847100  | -2.64223900 |
| C | -4.24541300 | 1.78741200  | 3.07256800  | <b>TSA4</b> |             |             |             |
| H | -5.28198700 | 1.67354900  | 3.37575100  | Pd          | 0.45271800  | 0.78131500  | 0.02625000  |
| C | -3.36483300 | 2.53036300  | 3.85615100  | P           | 1.40190900  | -1.32100300 | 0.22236500  |
| H | -3.71350800 | 3.00019200  | 4.77107200  | P           | -1.94824600 | 0.14531800  | -0.08257300 |
| C | -2.08655100 | 2.65864800  | -3.55210700 | C           | -0.35928100 | -4.69165300 | -1.43207000 |
| H | -1.42271100 | 2.83166800  | -4.39339600 | H           | -0.63346400 | -5.69472000 | -1.11911500 |
| C | -0.13165600 | -2.07764400 | 4.05485600  | C           | -2.12730200 | 1.95006500  | 2.05880300  |
| H | -0.53880800 | -1.42441000 | 4.82061300  | H           | -1.15028200 | 2.28989100  | 1.73155800  |
| C | -0.02548300 | -2.03903600 | -2.34674000 | C           | -4.01147600 | 0.46400900  | 1.85258200  |
| H | 0.48529600  | -1.11312600 | -2.60052700 | H           | -4.50892800 | -0.37151500 | 1.36869900  |
| C | -4.28363700 | -2.50515600 | -1.36064300 | C           | 0.64119000  | -1.34415700 | 2.88947300  |
| H | -4.79840900 | -2.78207700 | -2.27570100 | H           | 0.18838300  | -0.38487300 | 2.65056900  |
| C | -2.93890500 | -1.79793000 | 0.96603500  | C           | -2.06314600 | 1.17596000  | -2.64719400 |
| H | -2.41523800 | -1.53173300 | 1.87990000  | H           | -0.98379800 | 1.02371400  | -2.64495500 |
| C | -1.44841000 | -3.87116600 | -3.02169800 | C           | 1.94661200  | -3.25849900 | 2.22215900  |
| H | -2.02206800 | -4.38461600 | -3.78814700 | H           | 2.51807100  | -3.79609900 | 1.47059100  |
| C | 4.94461900  | -3.06503800 | 0.17003100  | C           | 1.33854600  | -2.03901700 | 1.89756000  |
| H | 5.60477800  | -3.60942000 | 0.83891300  | C           | -4.21108000 | 1.08297900  | -1.53933900 |
| C | -3.69750000 | -2.96128600 | 0.92961000  | H           | -4.81474300 | 0.85141700  | -0.66716700 |
| H | -3.75456800 | -3.59226600 | 1.81173100  | C           | 1.83362100  | -3.78210200 | 3.50558000  |
| C | -4.37738900 | -3.31487400 | -0.23376500 | H           | 2.30782900  | -4.72911800 | 3.74504600  |
| H | -4.97201400 | -4.22328700 | -0.26331200 | C           | 3.47393100  | -1.13662200 | -1.63134400 |
| C | 2.38605500  | 1.05130400  | 0.99624700  | H           | 2.68933400  | -0.92464100 | -2.35042900 |
| O | 3.17553000  | 0.28859900  | 1.49816200  | C           | -3.14464600 | -2.23067200 | -1.06284600 |
| C | 2.52167100  | 2.53874500  | 1.21679200  | H           | -3.27363600 | -1.70817200 | -2.00548800 |
| C | 1.58236400  | 3.38894800  | 0.63788700  | C           | 3.16289900  | -1.37813000 | -0.28809100 |
| C | 3.54013400  | 3.05997500  | 2.01635500  | C           | -4.81851000 | 1.61377600  | -2.67075700 |
| C | 1.63131300  | 4.75849200  | 0.88303800  | H           | -5.89038900 | 1.78875100  | -2.67610100 |
| C | 3.59366100  | 4.42570100  | 2.26224300  | C           | -2.55505000 | -1.58101900 | 0.02196800  |
| C | 2.63391500  | 5.26996600  | 1.70104800  | C           | -4.05222200 | 1.92510000  | -3.79414400 |
| H | 0.90242900  | 5.41863200  | 0.42139000  | H           | -4.52900900 | 2.34315500  | -4.67613100 |
| H | 4.37397200  | 4.83590100  | 2.89579700  | C           | 0.23174200  | -3.82703400 | -0.51558400 |
| H | 2.67337200  | 6.33817200  | 1.89327900  | H           | 0.39373800  | -4.16880000 | 0.50021700  |

|   |             |             |             |
|---|-------------|-------------|-------------|
| C | 5.82882000  | -1.32921400 | -1.13538000 |
| H | 6.86370700  | -1.31313900 | -1.46476300 |
| C | 4.19926200  | -1.56105600 | 0.62922200  |
| H | 3.98125700  | -1.69404400 | 1.68257000  |
| C | -2.72884100 | 2.55996600  | 3.15690900  |
| H | -2.21617300 | 3.37203700  | 3.66366300  |
| C | 0.58101000  | -2.52885500 | -0.89418400 |
| C | 1.11885200  | -3.09015300 | 4.48156100  |
| H | 1.03266400  | -3.49984900 | 5.48366000  |
| C | -2.76427800 | 0.90132800  | 1.38658800  |
| C | 4.79953300  | -1.11901400 | -2.05001100 |
| H | 5.02589700  | -0.93182900 | -3.09571800 |
| C | -2.82901200 | 0.85819000  | -1.52053500 |
| C | -0.29393900 | -2.96943200 | -3.10862400 |
| H | -0.50556400 | -2.62058000 | -4.11508600 |
| C | -4.61179600 | 1.07358500  | 2.94887200  |
| H | -5.57861600 | 0.72201900  | 3.29693000  |
| C | -3.97301100 | 2.12564100  | 3.60209500  |
| H | -4.44179400 | 2.59868800  | 4.45997700  |
| C | -2.67909500 | 1.70625600  | -3.78019000 |
| H | -2.07413700 | 1.95271900  | -4.64750800 |
| C | 0.52724300  | -1.86875000 | 4.17408700  |
| H | -0.01845400 | -1.31765400 | 4.93387800  |
| C | 0.28888400  | -2.09728100 | -2.19488700 |
| H | 0.51348000  | -1.07913200 | -2.50084100 |
| C | -3.57078200 | -3.55133300 | -0.94215700 |
| H | -4.02649000 | -4.04555100 | -1.79494000 |
| C | -2.37901000 | -2.28238000 | 1.22165300  |
| H | -1.91558700 | -1.79545300 | 2.07473900  |
| C | -0.61167000 | -4.27099600 | -2.73361800 |
| H | -1.07139100 | -4.94975900 | -3.44634200 |
| C | 5.52494100  | -1.54308100 | 0.20464800  |
| H | 6.32064600  | -1.68492200 | 0.92992900  |
| C | -2.80756800 | -3.59827400 | 1.34026200  |
| H | -2.66759900 | -4.12534800 | 2.27944000  |
| C | -3.41074200 | -4.23528500 | 0.25792600  |
| H | -3.74758700 | -5.26385900 | 0.34847300  |
| C | 2.04296900  | 1.64664400  | 0.95053700  |
| O | 2.96615600  | 1.09789500  | 1.50308400  |
| C | 1.79219900  | 3.11606000  | 1.11471600  |
| C | 0.69802000  | 3.66417600  | 0.43537100  |
| C | 2.58350100  | 3.90630800  | 1.94943800  |
| C | 0.36584300  | 5.00569500  | 0.64645100  |
| C | 2.25591600  | 5.24034800  | 2.15055500  |

|   |             |            |             |
|---|-------------|------------|-------------|
| C | 1.14006500  | 5.77888000 | 1.50396400  |
| H | -0.48260800 | 5.44041400 | 0.12475500  |
| H | 2.85113000  | 5.85750300 | 2.81618600  |
| H | 0.87584100  | 6.82070000 | 1.66374200  |
| H | 3.42952300  | 3.44679600 | 2.45091500  |
| N | 0.03861200  | 2.81390600 | -0.46926400 |
| H | -0.91509700 | 3.11315500 | -0.66000700 |
| O | 1.54073900  | 2.96706400 | -2.44580400 |
| H | 0.72271600  | 2.85607800 | -1.55250400 |
| C | 1.80497700  | 1.85297900 | -3.02672800 |
| C | 3.08918900  | 1.83671400 | -3.83340200 |
| H | 3.28532500  | 2.81474000 | -4.27819300 |
| H | 3.91475700  | 1.60314900 | -3.15076500 |
| H | 3.04675600  | 1.06358000 | -4.60388000 |
| O | 1.11562900  | 0.82430100 | -2.93934700 |

### IntA14

|    |             |             |             |
|----|-------------|-------------|-------------|
| Pd | 0.24710000  | 1.16144300  | 0.03027300  |
| P  | 1.81645800  | -0.56960900 | -0.05166900 |
| P  | -1.79969400 | -0.31470700 | 0.05347200  |
| C  | 0.98842400  | -3.86290300 | -2.44233600 |
| H  | 1.02121100  | -4.94597700 | -2.37493000 |
| C  | -2.44338300 | 1.10661700  | 2.35643600  |
| H  | -1.78274200 | 1.86110200  | 1.93325800  |
| C  | -3.53138100 | -1.04372800 | 2.20297000  |
| H  | -3.70733900 | -1.97907900 | 1.68017300  |
| C  | 1.03927500  | -1.19730700 | 2.54730400  |
| H  | 0.37189600  | -0.34589100 | 2.43683300  |
| C  | -2.53184700 | 0.90265100  | -2.33936400 |
| H  | -1.46601800 | 1.08468200  | -2.44194900 |
| C  | 2.77164500  | -2.62153700 | 1.66215400  |
| H  | 3.47574200  | -2.87068500 | 0.87296800  |
| C  | 1.88271200  | -1.55302300 | 1.49118300  |
| C  | -4.39273300 | 0.08232600  | -1.04104300 |
| H  | -4.78174800 | -0.39531000 | -0.14652300 |
| C  | 2.77535300  | -3.35124400 | 2.84569000  |
| H  | 3.46397600  | -4.18237900 | 2.96497500  |
| C  | 4.12084000  | -0.45300300 | -1.69077900 |
| H  | 3.48560900  | -0.77502200 | -2.50961300 |
| C  | -2.28008300 | -2.71004200 | -1.37816800 |
| H  | -2.65136300 | -2.08095300 | -2.18060700 |
| C  | 3.59419900  | -0.29730100 | -0.40619200 |
| C  | -5.27033200 | 0.51026800  | -2.03093600 |
| H  | -6.33884800 | 0.36305200  | -1.90496600 |
| C  | -1.83473300 | -2.13596700 | -0.18506400 |

|   |             |             |             |
|---|-------------|-------------|-------------|
| C | -4.78048100 | 1.13017700  | -3.17943300 |
| H | -5.46790300 | 1.46649300  | -3.95006800 |
| C | 1.36088100  | -3.09645300 | -1.34183000 |
| H | 1.66763600  | -3.59374100 | -0.42847500 |
| C | 6.30371800  | 0.19576600  | -0.89399500 |
| H | 7.35603400  | 0.38701800  | -1.08296800 |
| C | 4.43751300  | 0.11282000  | 0.63195100  |
| H | 4.04028700  | 0.25339200  | 1.63094400  |
| C | -3.08187100 | 1.33748900  | 3.57202700  |
| H | -2.90307800 | 2.26874400  | 4.10111300  |
| C | 1.30725700  | -1.70367900 | -1.40342200 |
| C | 1.90811700  | -3.00709600 | 3.88178600  |
| H | 1.91674400  | -3.57476800 | 4.80764900  |
| C | -2.66203100 | -0.08937200 | 1.66068900  |
| C | 5.46981600  | -0.20665200 | -1.93217300 |
| H | 5.86722800  | -0.33463600 | -2.93471200 |
| C | -3.01470700 | 0.27208600  | -1.18854200 |
| C | 0.48986400  | -1.86075700 | -3.68277900 |
| H | 0.14527400  | -1.37206900 | -4.58925200 |
| C | -4.16493900 | -0.80913200 | 3.41947600  |
| H | -4.83501000 | -1.55882100 | 3.83017800  |
| C | -3.93965900 | 0.38085600  | 4.10730200  |
| H | -4.43239200 | 0.56103500  | 5.05836000  |
| C | -3.41153900 | 1.32667400  | -3.33265200 |
| H | -3.02554400 | 1.82056700  | -4.21924100 |
| C | 1.04869000  | -1.92244100 | 3.73664200  |
| H | 0.38593600  | -1.63397400 | 4.54683500  |
| C | 0.85493000  | -1.09448400 | -2.58093200 |
| H | 0.79463800  | -0.00929600 | -2.63074000 |
| C | -2.25366400 | -4.09173500 | -1.54934300 |
| H | -2.60392800 | -4.52046700 | -2.48362600 |
| C | -1.34664300 | -2.97490300 | 0.82528100  |
| H | -0.99442500 | -2.55399300 | 1.76103400  |
| C | 0.56065800  | -3.24936100 | -3.61561600 |
| H | 0.27020400  | -3.85226500 | -4.47098500 |
| C | 5.78399800  | 0.35386200  | 0.38842700  |
| H | 6.42666300  | 0.67466300  | 1.20260100  |
| C | -1.32325200 | -4.35372000 | 0.65321400  |
| H | -0.94601500 | -4.98539800 | 1.45208200  |
| C | -1.78067200 | -4.91770600 | -0.53536000 |
| H | -1.76542200 | -5.99529100 | -0.67070800 |
| C | 1.61939400  | 2.64605400  | 0.37784700  |
| O | 2.73247900  | 2.45597600  | 0.80688500  |
| C | 1.02946200  | 3.97632700  | 0.15030700  |

|   |             |            |             |
|---|-------------|------------|-------------|
| C | -0.35404600 | 3.99352400 | -0.14239900 |
| C | 1.77800100  | 5.15434600 | 0.23332100  |
| C | -0.95490000 | 5.25509200 | -0.38094500 |
| C | 1.17506500  | 6.37886300 | -0.00118600 |
| C | -0.19529900 | 6.40829500 | -0.31118400 |
| H | -2.01569900 | 5.30612900 | -0.61510600 |
| H | 1.74697700  | 7.29970500 | 0.04880800  |
| H | -0.67686600 | 7.36523300 | -0.50030500 |
| H | 2.83494300  | 5.08060700 | 0.47316300  |
| N | -0.98730100 | 2.80260700 | -0.14848900 |
| H | -1.95316900 | 2.81664300 | -0.45145000 |

### TSA5

|    |             |             |             |
|----|-------------|-------------|-------------|
| C  | -0.89268000 | 2.71890400  | 0.61863900  |
| O  | -1.80804700 | 2.77727900  | 1.39614200  |
| C  | -0.21093400 | 3.89977400  | 0.03307200  |
| C  | 1.07127200  | 3.65687800  | -0.47155000 |
| C  | -0.78938100 | 5.16739800  | -0.01956400 |
| C  | 1.76264700  | 4.70924300  | -1.08833000 |
| C  | -0.10483500 | 6.20173700  | -0.64334100 |
| C  | 1.16503900  | 5.95975100  | -1.17979400 |
| H  | 2.76463900  | 4.54338300  | -1.47530500 |
| H  | -0.55105100 | 7.18806000  | -0.72172300 |
| H  | 1.70221400  | 6.76842000  | -1.66842700 |
| H  | -1.77733100 | 5.31453600  | 0.40620800  |
| N  | 1.60095600  | 2.39350000  | -0.22287700 |
| H  | 2.35560700  | 2.15608100  | -0.86028300 |
| C  | 2.61424900  | 2.45917700  | 1.48737000  |
| O  | 3.70267900  | 2.07809100  | 1.18161100  |
| O  | 1.83055400  | 2.82909400  | 2.30729700  |
| Pd | 0.02998200  | 0.99666400  | 0.03939200  |
| P  | -2.00724000 | -0.18212800 | 0.02553200  |
| C  | -2.37971200 | -1.02262600 | -1.56099400 |
| C  | -3.57308700 | 0.71715500  | 0.31796500  |
| C  | -2.00535400 | -1.50864200 | 1.29018400  |
| C  | -1.37826900 | -1.16334600 | -2.52205900 |
| C  | -3.65867500 | -1.52490000 | -1.83630700 |
| C  | -4.40761100 | 0.44841000  | 1.40064800  |
| C  | -3.93517700 | 1.70667400  | -0.60218800 |
| C  | -2.65555600 | -2.73653700 | 1.13511700  |
| C  | -1.25174700 | -1.27843500 | 2.44550900  |
| H  | -0.39640400 | -0.74325600 | -2.33518400 |
| C  | -1.62949000 | -1.83252800 | -3.71631100 |
| H  | -4.46307200 | -1.37970600 | -1.12039900 |
| C  | -3.91122400 | -2.19118100 | -3.02981200 |

|   |             |             |             |
|---|-------------|-------------|-------------|
| H | -4.13477200 | -0.31037100 | 2.12722300  |
| C | -5.59595000 | 1.15985400  | 1.55977600  |
| H | -3.27920900 | 1.93403000  | -1.43920900 |
| C | -5.12061100 | 2.41032500  | -0.44487100 |
| C | -2.53450000 | -3.72144600 | 2.11053000  |
| H | -3.22749900 | -2.94369500 | 0.23695800  |
| C | -1.12232200 | -2.26705700 | 3.41622200  |
| H | -0.74454800 | -0.32641500 | 2.57349700  |
| C | -2.89373100 | -2.35353800 | -3.96854800 |
| H | -0.83339800 | -1.94503400 | -4.44551200 |
| H | -4.90595500 | -2.57739500 | -3.23114900 |
| C | -5.95441800 | 2.13766700  | 0.63940200  |
| H | -6.23853600 | 0.94791000  | 2.40908000  |
| H | -5.39186600 | 3.17832600  | -1.16288900 |
| H | -3.03515500 | -4.67586400 | 1.97577000  |
| C | -1.75971300 | -3.49293600 | 3.24644000  |
| H | -0.50570800 | -2.08235400 | 4.29018000  |
| H | -3.09227600 | -2.87501400 | -4.90026200 |
| H | -6.87950600 | 2.69208600  | 0.76656400  |
| H | -1.65101100 | -4.27120400 | 3.99590300  |
| H | 1.92829000  | 0.43677700  | -2.64345700 |
| C | 2.93989100  | 0.23825600  | -2.29420400 |
| C | 4.02560800  | 0.66429000  | -3.05205500 |
| C | 3.13725200  | -0.42258200 | -1.07445000 |
| H | 3.85900800  | 1.17451900  | -3.99602000 |
| C | 5.32133600  | 0.45136700  | -2.58648300 |
| P | 1.64634400  | -0.93954800 | -0.14902700 |
| C | 4.43792100  | -0.62518400 | -0.61342400 |
| C | 5.52335100  | -0.18762700 | -1.36714500 |
| H | 6.17125500  | 0.79496600  | -3.16842500 |
| C | 1.19524000  | -2.53711900 | -0.93789900 |
| C | 2.23858400  | -1.45584400 | 1.50271100  |
| H | 4.60679100  | -1.10421400 | 0.34519400  |
| H | 6.53103100  | -0.33816000 | -0.99234900 |
| C | 0.32792000  | -3.39590400 | -0.25255100 |
| C | 1.58667800  | -2.87024700 | -2.23735000 |
| C | 2.07454900  | -0.57994900 | 2.57931000  |
| C | 2.84845200  | -2.69714900 | 1.72045400  |
| H | 0.04023700  | -3.17455900 | 0.76999600  |
| C | -0.16214100 | -4.54282600 | -0.86496100 |
| H | 2.27420300  | -2.23124900 | -2.78245800 |
| C | 1.09844200  | -4.02347600 | -2.84684400 |
| H | 1.59949100  | 0.38570800  | 2.43522000  |
| C | 2.51246000  | -0.93584000 | 3.85157500  |

|   |             |             |             |
|---|-------------|-------------|-------------|
| H | 2.97790400  | -3.39033000 | 0.89437300  |
| C | 3.27875900  | -3.05471400 | 2.99366200  |
| H | -0.84214700 | -5.18882300 | -0.31762100 |
| C | 0.21420900  | -4.85628200 | -2.16853000 |
| H | 1.41296600  | -4.26918400 | -3.85706800 |
| C | 3.11056900  | -2.17472200 | 4.06116400  |
| H | 2.38497600  | -0.23867900 | 4.67381400  |
| H | 3.74713400  | -4.02161400 | 3.15190500  |
| H | -0.17302700 | -5.74945900 | -2.64956400 |
| H | 3.44896500  | -2.45515100 | 5.05440800  |

### IntA15

|    |             |             |             |
|----|-------------|-------------|-------------|
| C  | -1.08607700 | 2.67925000  | 0.58061000  |
| O  | -2.06229600 | 2.72527300  | 1.27626000  |
| C  | -0.40818400 | 3.90132400  | 0.05268100  |
| C  | 0.92275900  | 3.76289200  | -0.32647700 |
| C  | -1.05900200 | 5.12834400  | -0.05878700 |
| C  | 1.61443000  | 4.85187300  | -0.85169500 |
| C  | -0.37936500 | 6.21013700  | -0.60634600 |
| C  | 0.95112200  | 6.06590200  | -1.00498200 |
| H  | 2.66200400  | 4.75027000  | -1.12065800 |
| H  | -0.88132800 | 7.16518900  | -0.72610200 |
| H  | 1.48226300  | 6.91398700  | -1.42737500 |
| H  | -2.09139600 | 5.21059200  | 0.26578500  |
| N  | 1.53005700  | 2.50220200  | -0.06781500 |
| H  | 2.29086300  | 2.31805200  | -0.71807300 |
| C  | 2.20497700  | 2.42017500  | 1.37990800  |
| O  | 3.39195200  | 2.13575500  | 1.29937200  |
| O  | 1.38078400  | 2.58682100  | 2.27828200  |
| Pd | -0.04119200 | 1.00904500  | 0.07880700  |
| P  | -1.99029700 | -0.28273400 | 0.02926700  |
| C  | -2.30235600 | -1.11765500 | -1.57140000 |
| C  | -3.61435300 | 0.49148400  | 0.35193700  |
| C  | -1.87365000 | -1.61294500 | 1.28333500  |
| C  | -1.30824700 | -1.13083000 | -2.54993600 |
| C  | -3.53045300 | -1.73549000 | -1.84409100 |
| C  | -4.32848900 | 0.26060700  | 1.52590700  |
| C  | -4.13742400 | 1.35695100  | -0.61448800 |
| C  | -2.48517100 | -2.86321600 | 1.14741800  |
| C  | -1.08154900 | -1.35949600 | 2.40752800  |
| H  | -0.36964000 | -0.62088800 | -2.36297800 |
| C  | -1.51214100 | -1.78765700 | -3.75986000 |
| H  | -4.33599500 | -1.68605900 | -1.11678200 |
| C  | -3.73523000 | -2.39070400 | -3.05253700 |
| H  | -3.92877000 | -0.40077300 | 2.28797900  |



|   |             |             |             |
|---|-------------|-------------|-------------|
| C | -5.55697600 | 0.88571500  | 1.72992100  |
| H | -3.58048800 | 1.55104000  | -1.52790900 |
| C | -5.36279300 | 1.97574900  | -0.41083000 |
| C | -2.28648700 | -3.84761600 | 2.10956000  |
| H | -3.08618200 | -3.08799800 | 0.27308800  |
| C | -0.87537800 | -2.34841000 | 3.36540100  |
| H | -0.60243500 | -0.39083100 | 2.52277100  |
| C | -2.72221300 | -2.42526500 | -4.00929100 |
| H | -0.72117700 | -1.80028800 | -4.50293500 |
| H | -4.69028500 | -2.86753900 | -3.25156900 |
| C | -6.07546400 | 1.74102100  | 0.76457600  |
| H | -6.10539000 | 0.70370900  | 2.64919900  |
| H | -5.76106200 | 2.64654000  | -1.16612500 |
| H | -2.75614300 | -4.81951900 | 1.98947000  |
| C | -1.47329000 | -3.59568400 | 3.21383400  |
| H | -0.22730400 | -2.14543200 | 4.21191700  |
| H | -2.88345300 | -2.93811500 | -4.95287000 |
| H | -7.03221600 | 2.22856400  | 0.92654200  |
| H | -1.30370600 | -4.37349300 | 3.95234300  |
| H | 1.84876500  | 0.60947700  | -2.61008700 |
| C | 2.87457000  | 0.49104300  | -2.26498700 |
| C | 3.91678500  | 1.03094800  | -3.01138700 |
| C | 3.13209700  | -0.18375800 | -1.06404300 |
| H | 3.70408400  | 1.54975100  | -3.94141600 |
| C | 5.22754400  | 0.91752500  | -2.55228200 |
| P | 1.69888100  | -0.83727500 | -0.13389700 |
| C | 4.44571800  | -0.28257900 | -0.60740300 |
| C | 5.48690200  | 0.26603700  | -1.35065600 |
| H | 6.04305200  | 1.34895000  | -3.12494400 |
| C | 1.31043500  | -2.40750000 | -1.00825700 |
| C | 2.36019100  | -1.41757300 | 1.46971800  |
| H | 4.65539200  | -0.76309800 | 0.34198300  |
| H | 6.50432200  | 0.19568700  | -0.97883600 |
| C | 0.47672200  | -3.33335500 | -0.36985000 |
| C | 1.72753300  | -2.66725700 | -2.31623500 |
| C | 2.23014400  | -0.60199500 | 2.59826200  |
| C | 3.00132900  | -2.65718100 | 1.58908900  |
| H | 0.17847800  | -3.17419100 | 0.66075900  |
| C | 0.03773000  | -4.46969600 | -1.03769600 |
| H | 2.39407900  | -1.97837000 | -2.82500700 |
| C | 1.29301100  | -3.81164400 | -2.98093500 |
| H | 1.74760500  | 0.36971100  | 2.53920100  |
| C | 2.72805600  | -1.02728300 | 3.82707500  |
| H | 3.11154300  | -3.29874700 | 0.71989800  |

|   |             |             |             |
|---|-------------|-------------|-------------|
| C | 3.49051800  | -3.08008200 | 2.81989600  |
| H | -0.61834500 | -5.16741300 | -0.52574600 |
| C | 0.43657200  | -4.70834800 | -2.35050300 |
| H | 1.62755800  | -3.99966500 | -3.99712900 |
| C | 3.35192000  | -2.26560000 | 3.94205500  |
| H | 2.62891300  | -0.37779000 | 4.69114200  |
| H | 3.98184700  | -4.04516900 | 2.90138200  |
| H | 0.09008400  | -5.59382900 | -2.87490200 |
| H | 3.73598100  | -2.59543800 | 4.90314900  |

### IntA16

|    |             |             |             |
|----|-------------|-------------|-------------|
| C  | 1.96602600  | 1.19284300  | -1.55624300 |
| O  | 2.02583400  | 0.71487500  | -2.66359100 |
| C  | 3.03609700  | 2.01293700  | -0.95133100 |
| C  | 2.86302100  | 2.94003800  | 0.09780000  |
| C  | 4.33072100  | 1.72086300  | -1.41077300 |
| C  | 4.02096700  | 3.48140000  | 0.68888800  |
| C  | 5.45490300  | 2.27357000  | -0.82829100 |
| C  | 5.28840800  | 3.15027300  | 0.24486300  |
| H  | 3.90608500  | 4.19514800  | 1.50113700  |
| H  | 6.44514200  | 2.01658500  | -1.18944100 |
| H  | 6.15340700  | 3.59323400  | 0.73051400  |
| H  | 4.42325700  | 1.00767600  | -2.22293800 |
| N  | 1.64475900  | 3.36440400  | 0.60984200  |
| H  | 1.72128100  | 4.00682900  | 1.38640500  |
| C  | 0.38746800  | 3.55821200  | -0.04061800 |
| O  | -0.38871400 | 4.32244900  | 0.52041800  |
| O  | 0.19074500  | 2.89904700  | -1.12958600 |
| Pd | 0.25877900  | 0.80653800  | -0.59653900 |
| P  | 1.17197900  | -1.18175100 | 0.14855500  |
| C  | 0.76304500  | -1.59301600 | 1.88302900  |
| C  | 3.00382300  | -1.24823700 | 0.19988000  |
| C  | 0.69557400  | -2.59029300 | -0.91544400 |
| C  | -0.04743700 | -0.72655000 | 2.61697100  |
| C  | 1.30645900  | -2.71690900 | 2.51903700  |
| C  | 3.76403200  | -1.95669500 | -0.72992700 |
| C  | 3.65148300  | -0.48813100 | 1.18181600  |
| C  | 0.34600400  | -3.85569600 | -0.44378000 |
| C  | 0.72120000  | -2.35266000 | -2.29737800 |
| H  | -0.42915800 | 0.17584900  | 2.15333200  |
| C  | -0.36565600 | -1.00137600 | 3.94452300  |
| H  | 1.99633200  | -3.36400400 | 1.98441300  |
| C  | 0.98580900  | -2.99603600 | 3.84248100  |
| H  | 3.27696200  | -2.54218400 | -1.50318800 |
| C  | 5.15635600  | -1.91590300 | -0.66905100 |

|   |             |             |             |
|---|-------------|-------------|-------------|
| H | 3.06804300  | 0.08692200  | 1.89610300  |
| C | 5.03748800  | -0.45457700 | 1.24267000  |
| C | 0.05564400  | -4.87978200 | -1.34105600 |
| H | 0.26972500  | -4.04550800 | 0.62077600  |
| C | 0.43408700  | -3.38119100 | -3.18811700 |
| H | 0.97786000  | -1.36440500 | -2.67305800 |
| C | 0.14043200  | -2.14451700 | 4.55407000  |
| H | -1.00695500 | -0.31614000 | 4.49093300  |
| H | 1.40567300  | -3.87376300 | 4.32454000  |
| C | 5.79381200  | -1.17079800 | 0.31644300  |
| H | 5.74016100  | -2.47253300 | -1.39615700 |
| H | 5.52774900  | 0.14692100  | 2.00150900  |
| H | -0.22330500 | -5.85876600 | -0.96277400 |
| C | 0.10701300  | -4.64866400 | -2.71155300 |
| H | 0.46413700  | -3.18825500 | -4.25621400 |
| H | -0.10598800 | -2.36577100 | 5.58834200  |
| H | 6.87845700  | -1.13913100 | 0.35943200  |
| H | -0.11775800 | -5.45144300 | -3.40784700 |
| H | -1.37730900 | 2.57578000  | 1.63388300  |
| C | -2.25874100 | 2.11889500  | 2.07584900  |
| C | -2.78298000 | 2.65300300  | 3.25088200  |
| C | -2.89170600 | 1.04167400  | 1.44850100  |
| H | -2.28615400 | 3.49693500  | 3.71923300  |
| C | -3.93901600 | 2.11648100  | 3.80866500  |
| P | -2.16595800 | 0.42469700  | -0.11945900 |
| C | -4.07109400 | 0.52663400  | 1.99891400  |
| C | -4.58651900 | 1.05604000  | 3.17657600  |
| H | -4.34465300 | 2.53051100  | 4.72730000  |
| C | -2.59412000 | -1.35868700 | -0.17634000 |
| C | -3.25511400 | 1.17452700  | -1.38770200 |
| H | -4.58686300 | -0.29605400 | 1.51261100  |
| H | -5.49872500 | 0.64421500  | 3.59839400  |
| C | -2.73253800 | -1.97989700 | -1.42427000 |
| C | -2.67516500 | -2.14457100 | 0.97739800  |
| C | -2.78737800 | 2.29312600  | -2.08324400 |
| C | -4.55340900 | 0.70391700  | -1.62110400 |
| H | -2.64554400 | -1.39365000 | -2.33449400 |
| C | -2.99563400 | -3.34122700 | -1.51182900 |
| H | -2.54531500 | -1.69479200 | 1.95587200  |
| C | -2.93599500 | -3.50966200 | 0.88726700  |
| H | -1.78848700 | 2.67942500  | -1.88960400 |
| C | -3.61443000 | 2.92534400  | -3.01084600 |
| H | -4.92457000 | -0.16493200 | -1.08471700 |
| C | -5.36927800 | 1.33643000  | -2.55049500 |

|   |             |             |             |
|---|-------------|-------------|-------------|
| H | -3.10100000 | -3.80475600 | -2.48765000 |
| C | -3.10891300 | -4.10881700 | -0.35530000 |
| H | -3.00576700 | -4.10089600 | 1.79567800  |
| C | -4.89878100 | 2.44866200  | -3.24823900 |
| H | -3.24570400 | 3.79484200  | -3.54636000 |
| H | -6.37350300 | 0.96351100  | -2.72994100 |
| H | -3.31580100 | -5.17270200 | -0.42549800 |
| H | -5.53791700 | 2.94272000  | -3.97452800 |

### TSA6

|    |             |             |             |
|----|-------------|-------------|-------------|
| Pd | -0.18567400 | -0.82390500 | -0.37255000 |
| P  | -1.29052500 | 1.16801000  | 0.07722300  |
| P  | 2.24620100  | -0.47190100 | -0.05650900 |
| C  | -0.16216600 | 2.75863100  | 3.71745800  |
| H  | -0.49757100 | 2.69909300  | 4.74880200  |
| C  | 2.95676800  | -3.05092400 | -0.79046300 |
| H  | 2.10244000  | -3.36121700 | -0.19332400 |
| C  | 4.36987900  | -1.32964100 | -1.73524300 |
| H  | 4.62321300  | -0.28126400 | -1.86318600 |
| C  | -3.28536700 | 0.02540900  | 1.62372800  |
| H  | -2.49627600 | -0.66267600 | 1.91954100  |
| C  | 3.66535700  | 1.99929900  | -0.25743100 |
| H  | 4.20448400  | 1.71402800  | 0.64085300  |
| C  | -4.04544400 | 1.86513500  | 0.26214800  |
| H  | -3.85480200 | 2.63424900  | -0.47980700 |
| C  | -3.01209300 | 1.02677700  | 0.68448600  |
| C  | 2.03383100  | 1.52021400  | -1.96585100 |
| H  | 1.29281800  | 0.85361600  | -2.39996300 |
| C  | -5.32717500 | 1.71523300  | 0.78595200  |
| H  | -6.12572200 | 2.36835100  | 0.44642100  |
| C  | -1.47514600 | 3.70528500  | -1.18794700 |
| H  | -1.48128300 | 4.13943200  | -0.19255300 |
| C  | 4.31467900  | -0.77752000 | 1.86849200  |
| H  | 4.93126100  | -1.16795100 | 1.06396100  |
| C  | -1.39101600 | 2.31706300  | -1.34583100 |
| C  | 2.24872300  | 2.77130900  | -2.53274800 |
| H  | 1.67414900  | 3.07120600  | -3.40400900 |
| C  | 2.99147200  | -0.40208800 | 1.61379400  |
| C  | 3.17243400  | 3.64321700  | -1.95857800 |
| H  | 3.33319800  | 4.62705400  | -2.38953300 |
| C  | -0.88629300 | 2.10652300  | 2.72231000  |
| H  | -1.77650200 | 1.54923400  | 2.99454200  |
| C  | -1.51738400 | 3.99044900  | -3.58313300 |
| H  | -1.56045400 | 4.64129900  | -4.45166400 |
| C  | -1.38335100 | 1.77420600  | -2.63501600 |

|   |             |             |             |
|---|-------------|-------------|-------------|
| H | -1.31866800 | 0.69792100  | -2.77219700 |
| C | 3.73083800  | -4.02075000 | -1.42020800 |
| H | 3.47013700  | -5.06756500 | -1.29855000 |
| C | -0.47365500 | 2.16980900  | 1.38757600  |
| C | -5.58363900 | 0.73734800  | 1.74173400  |
| H | -6.58363100 | 0.62395300  | 2.14992900  |
| C | 3.27803000  | -1.69688000 | -0.94165000 |
| C | -1.53347900 | 4.53688500  | -2.30145000 |
| H | -1.59047500 | 5.61304200  | -2.16745800 |
| C | 2.72748400  | 1.12773500  | -0.81507800 |
| C | 1.38843800  | 3.56534800  | 2.06530800  |
| H | 2.27685700  | 4.12746800  | 1.79462600  |
| C | 5.13519100  | -2.30553600 | -2.36752700 |
| H | 5.97913300  | -2.01181000 | -2.98512600 |
| C | 4.81741600  | -3.65207900 | -2.20918000 |
| H | 5.41334600  | -4.41267200 | -2.70567200 |
| C | 3.88667400  | 3.25078300  | -0.82903900 |
| H | 4.61200400  | 3.92510700  | -0.38247000 |
| C | -4.55901500 | -0.10709400 | 2.16240900  |
| H | -4.75765500 | -0.88987300 | 2.88734700  |
| C | 0.66736100  | 2.91622400  | 1.06967000  |
| H | 0.99785800  | 2.99601100  | 0.03977000  |
| C | 4.84156400  | -0.65905300 | 3.15118500  |
| H | 5.86849900  | -0.95721700 | 3.34109600  |
| C | 2.20319600  | 0.07759500  | 2.66353800  |
| H | 1.17001200  | 0.35538300  | 2.47903400  |
| C | 0.98109000  | 3.48334300  | 3.39376500  |
| H | 1.54960800  | 3.98367400  | 4.17191000  |
| C | -1.44854100 | 2.60973900  | -3.74739100 |
| H | -1.43971300 | 2.17641300  | -4.74298600 |
| C | 2.73436700  | 0.20419800  | 3.94306100  |
| H | 2.11100100  | 0.58729900  | 4.74540800  |
| C | 4.05421300  | -0.16394400 | 4.18863400  |
| H | 4.46839300  | -0.07305700 | 5.18869100  |
| C | -1.69958700 | -1.74249800 | -1.41619200 |
| O | -1.54600400 | -1.50098700 | -2.58865700 |
| C | -2.94983900 | -2.18137000 | -0.76307600 |
| C | -2.98383800 | -3.07264800 | 0.31925800  |
| C | -4.14170100 | -1.63594900 | -1.25170000 |
| C | -4.22407400 | -3.39855300 | 0.88618600  |
| C | -5.36153200 | -1.95223100 | -0.67749000 |
| C | -5.39467400 | -2.84218500 | 0.39640100  |
| H | -4.25866600 | -4.10146500 | 1.71481500  |
| H | -6.27655100 | -1.51263600 | -1.05945800 |

|   |             |             |             |
|---|-------------|-------------|-------------|
| H | -6.34221200 | -3.10714300 | 0.85632500  |
| H | -4.08481600 | -0.95049500 | -2.09107300 |
| N | -1.83396000 | -3.63812800 | 0.84551900  |
| H | -1.93250800 | -4.26703300 | 1.62874300  |
| C | -0.56896500 | -3.69099600 | 0.25404000  |
| O | 0.30436800  | -4.36201200 | 0.77709100  |
| O | -0.43380200 | -3.00322200 | -0.85572400 |

### IntA17

|    |             |             |             |
|----|-------------|-------------|-------------|
| Pd | 0.06655500  | -0.31511000 | -0.87134900 |
| P  | 2.32483400  | -0.16156400 | -0.37696400 |
| P  | -1.63009100 | 1.05610700  | -0.15245900 |
| C  | 1.96898100  | 2.04585500  | 3.08857900  |
| H  | 1.76581800  | 3.08079200  | 3.34751200  |
| C  | -3.63004600 | 0.55491800  | -1.99809600 |
| H  | -3.03323200 | -0.32906500 | -2.20696100 |
| C  | -3.93867400 | 2.61652400  | -0.78611800 |
| H  | -3.59258400 | 3.33969400  | -0.05231800 |
| C  | 2.64577500  | 1.53144800  | -2.55682400 |
| H  | 1.84488600  | 0.92541700  | -2.97464100 |
| C  | -1.24015600 | 0.26540300  | 2.47981200  |
| H  | -0.18824700 | 0.34973900  | 2.22539500  |
| C  | 4.12501600  | 2.04460800  | -0.73041900 |
| H  | 4.49005600  | 1.85598500  | 0.27478500  |
| C  | 3.11109700  | 1.24587800  | -1.26944400 |
| C  | -3.56425700 | 0.43997600  | 1.86677100  |
| H  | -4.33701600 | 0.68438300  | 1.14423800  |
| C  | 4.65132600  | 3.10808700  | -1.45706600 |
| H  | 5.43162700  | 3.72472200  | -1.02034400 |
| C  | 3.28985400  | -2.67496200 | -1.06337700 |
| H  | 2.29844700  | -2.82170600 | -1.48096100 |
| C  | -1.03587800 | 3.45258800  | 1.30150100  |
| H  | -1.69604900 | 3.09219400  | 2.08500300  |
| C  | 3.61073100  | -1.47164300 | -0.43349000 |
| C  | -3.92649500 | -0.04435400 | 3.12469600  |
| H  | -4.97790200 | -0.16328600 | 3.37215400  |
| C  | -0.86353800 | 2.70667700  | 0.13352400  |
| C  | -2.94771300 | -0.36977800 | 4.06115400  |
| H  | -3.23232500 | -0.74971300 | 5.03807300  |
| C  | 2.11207800  | 1.69534300  | 1.74990200  |
| H  | 2.00592000  | 2.46138000  | 0.98792000  |
| C  | 5.49468400  | -3.53136900 | -0.58968100 |
| H  | 6.22720200  | -4.33153700 | -0.64772200 |
| C  | 4.88427600  | -1.31127600 | 0.12676300  |
| H  | 5.14143900  | -0.38850900 | 0.63897800  |

|   |             |             |             |
|---|-------------|-------------|-------------|
| C | -4.82341600 | 0.77485400  | -2.68156000 |
| H | -5.16049400 | 0.05662000  | -3.42365000 |
| C | 2.36590900  | 0.36665700  | 1.38531200  |
| C | 4.17876000  | 3.38314500  | -2.73848200 |
| H | 4.59029700  | 4.21420200  | -3.30412300 |
| C | -3.18373900 | 1.46541700  | -1.03832000 |
| C | 4.23031600  | -3.70119500 | -1.14173600 |
| H | 3.96339800  | -4.63433500 | -1.62845600 |
| C | -2.21745900 | 0.59015400  | 1.52853600  |
| C | 2.30198500  | -0.25126000 | 3.72737300  |
| H | 2.36090600  | -1.02191700 | 4.49006000  |
| C | -5.12673800 | 2.84101900  | -1.47377500 |
| H | -5.70560700 | 3.73819200  | -1.27441300 |
| C | -5.57269400 | 1.91790500  | -2.41945900 |
| H | -6.50001100 | 2.09667100  | -2.95621300 |
| C | -1.60023600 | -0.20298300 | 3.73764900  |
| H | -0.82175200 | -0.46404800 | 4.44682900  |
| C | 3.17681200  | 2.58916600  | -3.29002100 |
| H | 2.80203700  | 2.79652100  | -4.28815600 |
| C | 2.45290500  | -0.60405400 | 2.38899500  |
| H | 2.60745500  | -1.64626600 | 2.12861600  |
| C | -0.33618000 | 4.64428500  | 1.48569900  |
| H | -0.47088900 | 5.20965800  | 2.40358000  |
| C | 0.00960100  | 3.18444300  | -0.85118800 |
| H | 0.17655200  | 2.59454800  | -1.74769500 |
| C | 2.06395100  | 1.07425100  | 4.08242300  |
| H | 1.94458000  | 1.34756600  | 5.12701800  |
| C | 5.82099400  | -2.33378800 | 0.04783300  |
| H | 6.80580000  | -2.20050600 | 0.48642700  |
| C | 0.70954100  | 4.37097300  | -0.66888300 |
| H | 1.40753200  | 4.70371600  | -1.43163800 |
| C | 0.54170500  | 5.10161400  | 0.50689700  |
| H | 1.09866900  | 6.02115800  | 0.66173700  |
| C | -1.87562500 | -3.20034900 | -0.97878100 |
| C | -2.53683800 | -2.78663800 | 0.17981100  |
| C | -2.57147300 | -3.30991000 | -2.18569400 |
| C | -3.89862700 | -2.47745700 | 0.13283100  |
| C | -3.92213300 | -3.00867900 | -2.23486600 |
| C | -4.57660300 | -2.58990200 | -1.07078600 |
| H | -4.40584700 | -2.14449600 | 1.03193700  |
| H | -4.46858600 | -3.09315500 | -3.16815400 |
| H | -5.63256000 | -2.34051500 | -1.10626800 |
| H | -2.02675000 | -3.63585000 | -3.06533400 |
| N | -1.81425300 | -2.70596900 | 1.35674600  |

|   |             |             |             |
|---|-------------|-------------|-------------|
| H | -2.22633300 | -2.27140100 | 2.17332800  |
| C | -0.47437900 | -2.97391100 | 1.46866800  |
| O | 0.15541200  | -2.84665200 | 2.48409000  |
| O | 0.13311500  | -3.45840400 | 0.34105000  |
| C | -0.45061600 | -3.54196300 | -0.90684100 |
| O | 0.22821500  | -3.91899900 | -1.82505000 |

### prodA1

|   |             |             |             |
|---|-------------|-------------|-------------|
| C | -0.70698200 | 1.39127000  | 0.00001000  |
| O | -0.74316200 | 2.58900900  | 0.00013400  |
| C | 0.50653800  | 0.56407200  | 0.00000600  |
| C | 0.38859800  | -0.82751800 | 0.00001600  |
| C | 1.76959400  | 1.16134600  | -0.00002400 |
| C | 1.53413700  | -1.62678200 | -0.00002200 |
| C | 2.90834200  | 0.37335500  | -0.00000800 |
| C | 2.78133800  | -1.01960000 | -0.00005900 |
| H | 1.44404900  | -2.70901200 | 0.00008400  |
| H | 3.89129100  | 0.83139600  | 0.00003800  |
| H | 3.67095200  | -1.64192600 | -0.00000400 |
| H | 1.82557800  | 2.24475200  | -0.00001500 |
| N | -0.88446500 | -1.37605700 | 0.00021900  |
| H | -1.00893000 | -2.37783700 | -0.00041300 |
| C | -2.05479900 | -0.65404300 | 0.00000500  |
| O | -3.14530200 | -1.15404200 | 0.00003600  |
| O | -1.91057200 | 0.70408700  | -0.00026500 |

### IntA1'

|    |             |             |             |
|----|-------------|-------------|-------------|
| Pd | -0.00702900 | -0.56199200 | -0.75599200 |
| P  | 2.20998500  | -0.07391500 | -0.18097600 |
| P  | -1.48230800 | 1.16285200  | -0.07523500 |
| C  | 1.86798800  | 1.91357500  | 3.42908300  |
| H  | 1.80005800  | 2.94351400  | 3.76619500  |
| C  | -2.91148500 | 1.14527400  | -2.45829900 |
| H  | -2.23142900 | 0.33865900  | -2.71871200 |
| C  | -3.67272100 | 2.79644000  | -0.87437900 |
| H  | -3.58343600 | 3.28675200  | 0.09173100  |
| C  | 2.66295000  | 1.73178800  | -2.23831800 |
| H  | 1.82234900  | 1.21485100  | -2.69676500 |
| C  | -1.60107600 | 0.44853600  | 2.60057600  |
| H  | -0.52893300 | 0.61990500  | 2.57705000  |
| C  | 4.16591200  | 2.00547200  | -0.37733800 |
| H  | 4.51722300  | 1.70448400  | 0.60572200  |
| C  | 3.08500000  | 1.34135300  | -0.96522500 |
| C  | -3.74188400 | 0.42711300  | 1.49530600  |
| H  | -4.34962000 | 0.58941600  | 0.61075000  |
| C  | 4.78759800  | 3.06118600  | -1.03540200 |

|   |             |             |             |
|---|-------------|-------------|-------------|
| H | 5.61849000  | 3.57737700  | -0.56328400 |
| C | 4.57194200  | -1.47501700 | 0.66358200  |
| H | 4.60047600  | -0.82331900 | 1.53223300  |
| C | -0.89249900 | 3.45187300  | 1.57561300  |
| H | -1.59171000 | 3.06745000  | 2.31163800  |
| C | 3.53803300  | -1.35033600 | -0.26987700 |
| C | -4.33092900 | -0.06189600 | 2.66001400  |
| H | -5.39818100 | -0.26515600 | 2.67730500  |
| C | -0.68709000 | 2.76365000  | 0.37840200  |
| C | -3.56078300 | -0.28460500 | 3.79776800  |
| H | -4.02373200 | -0.66425300 | 4.70411100  |
| C | 2.07710800  | 1.65417700  | 2.07595500  |
| H | 2.15928500  | 2.48742400  | 1.38509800  |
| C | 5.53450900  | -3.28637200 | -0.60983700 |
| H | 6.30632200  | -4.03979100 | -0.73731200 |
| C | 3.52069000  | -2.20566500 | -1.37553100 |
| H | 2.71893300  | -2.11176800 | -2.10389800 |
| C | -3.88732400 | 1.56180000  | -3.36139200 |
| H | -3.96317400 | 1.08172000  | -4.33309200 |
| C | 2.15397300  | 0.33842300  | 1.60950100  |
| C | 4.35041300  | 3.45196700  | -2.30012700 |
| H | 4.83862700  | 4.27520100  | -2.81378800 |
| C | -2.80097200 | 1.75325600  | -1.20720600 |
| C | 5.56016700  | -2.44046700 | 0.49673700  |
| H | 6.35416700  | -2.53121400 | 1.23249800  |
| C | -2.37094800 | 0.69036500  | 1.45598900  |
| C | 1.79417700  | -0.44997600 | 3.87659700  |
| H | 1.67603100  | -1.27672400 | 4.57099200  |
| C | -4.64954700 | 3.20973700  | -1.77309600 |
| H | -5.32290800 | 4.01929800  | -1.50645300 |
| C | -4.75845100 | 2.59103700  | -3.01860300 |
| H | -5.51940300 | 2.91818400  | -3.72161100 |
| C | -2.19234800 | -0.02285300 | 3.76549500  |
| H | -1.57582300 | -0.20006100 | 4.64206300  |
| C | 3.29238800  | 2.77987400  | -2.90568500 |
| H | 2.95139600  | 3.07433900  | -3.89394800 |
| C | 1.99540900  | -0.71058500 | 2.52620300  |
| H | 2.01770700  | -1.73984100 | 2.17807800  |
| C | -0.18115100 | 4.61947000  | 1.84797800  |
| H | -0.34432200 | 5.13917500  | 2.78815200  |
| C | 0.22089800  | 3.28503800  | -0.54865200 |
| H | 0.39121600  | 2.75582300  | -1.48059800 |
| C | 1.73115200  | 0.86586900  | 4.33402600  |
| H | 1.56745900  | 1.07084900  | 5.38802900  |

|   |             |             |             |
|---|-------------|-------------|-------------|
| C | 4.51488000  | -3.16426300 | -1.54960800 |
| H | 4.48813100  | -3.82053800 | -2.41467000 |
| C | 0.93342100  | 4.44731700  | -0.28047700 |
| H | 1.65524600  | 4.81314800  | -1.00509900 |
| C | 0.73910600  | 5.11463700  | 0.92821600  |
| H | 1.30178500  | 6.01670100  | 1.15089200  |
| C | -0.05850100 | -2.72760200 | -1.64220200 |
| C | -1.26344600 | -2.44807500 | -0.95734300 |
| C | -2.47918900 | -2.21216100 | -1.66946000 |
| C | -2.42888300 | -2.23124900 | -3.05838000 |
| C | -1.22491100 | -2.46429600 | -3.74300600 |
| C | -0.05451800 | -2.70830100 | -3.05940700 |
| H | 0.77725200  | -3.16932300 | -1.11130200 |
| H | -3.33838600 | -2.02029700 | -3.61563100 |
| H | -1.23153200 | -2.47234900 | -4.82918100 |
| H | 0.86470200  | -2.93687700 | -3.58997400 |
| N | -3.64310800 | -1.86966400 | -1.00931000 |
| H | -4.49891800 | -1.99811100 | -1.52740100 |
| H | -3.71299800 | -2.12177600 | -0.03340900 |
| I | -1.36597700 | -3.08359800 | 1.10827200  |

**TSA1'**

|    |             |             |             |
|----|-------------|-------------|-------------|
| Pd | 0.09422600  | -0.82015900 | -0.36200500 |
| P  | 1.69124300  | 0.97641800  | -0.18434400 |
| P  | -2.08017200 | 0.15819500  | 0.03471300  |
| C  | 0.75688600  | 3.46216200  | 3.01341000  |
| H  | 0.50599000  | 4.50473800  | 3.18379900  |
| C  | -3.17050700 | -0.74008200 | -2.36139100 |
| H  | -2.26770700 | -1.34303200 | -2.41096100 |
| C  | -4.52268200 | 0.90140400  | -1.22112800 |
| H  | -4.67761000 | 1.57847100  | -0.38561800 |
| C  | 0.61077600  | 2.13616200  | -2.46683600 |
| H  | 0.06724500  | 1.19569400  | -2.53506500 |
| C  | -2.09576000 | -0.90116900 | 2.60592400  |
| H  | -1.09821100 | -0.47304300 | 2.66105400  |
| C  | 2.20606000  | 3.53637100  | -1.32629300 |
| H  | 2.92575700  | 3.68735200  | -0.52622800 |
| C  | 1.48423200  | 2.33795800  | -1.39566400 |
| C  | -4.12106800 | -1.32787300 | 1.37245600  |
| H  | -4.72159700 | -1.22895300 | 0.47383700  |
| C  | 2.01827300  | 4.52913400  | -2.28123700 |
| H  | 2.57659800  | 5.45809300  | -2.21216400 |
| C  | 4.26641900  | 0.50342400  | 0.94282600  |
| H  | 3.78621700  | 0.49561000  | 1.91530400  |
| C  | -2.49404300 | 2.31920900  | 1.87725500  |

|   |             |             |             |               |             |             |             |
|---|-------------|-------------|-------------|---------------|-------------|-------------|-------------|
| H | -2.72831200 | 1.58205500  | 2.63768200  | C             | -2.20800400 | 4.63910800  | 1.26146200  |
| C | 3.52700500  | 0.79695800  | -0.20558500 | H             | -2.21623600 | 5.69182600  | 1.52936600  |
| C | -4.62207600 | -2.04712000 | 2.45662900  | C             | 1.17641400  | -2.53295900 | 0.30962800  |
| H | -5.60622000 | -2.50148300 | 2.38874100  | C             | 2.58929300  | -2.50974300 | 0.34379400  |
| C | -2.18344600 | 1.91769100  | 0.57710800  | C             | 0.42949400  | -2.84181700 | 1.44979700  |
| C | -3.86957600 | -2.18339000 | 3.61820500  | C             | 3.19814700  | -2.65557100 | 1.59448200  |
| H | -4.26326100 | -2.74359300 | 4.46119900  | C             | 1.06691200  | -2.98998200 | 2.68445100  |
| C | 1.05478400  | 3.03425300  | 1.72153400  | H             | -0.64491900 | -2.96540900 | 1.37270100  |
| H | 1.01185300  | 3.74809900  | 0.90673100  | C             | 2.45063600  | -2.88635500 | 2.74902500  |
| C | 6.26777000  | 0.20367200  | -0.38031100 | H             | 4.28121700  | -2.58050300 | 1.65191500  |
| H | 7.32615900  | -0.02981900 | -0.44692900 | H             | 0.47769300  | -3.20712000 | 3.56999100  |
| C | 4.18594800  | 0.80224800  | -1.44365300 | H             | 2.96541700  | -3.00450100 | 3.69819100  |
| H | 3.63115200  | 1.03025400  | -2.35006300 | N             | 3.33915300  | -2.35572800 | -0.80614300 |
| C | -4.12574900 | -0.82341100 | -3.37224700 | H             | 4.25849300  | -1.95939800 | -0.65779000 |
| H | -3.96554600 | -1.49544300 | -4.21009200 | H             | 2.85089600  | -1.88745600 | -1.55908700 |
| C | 1.35935700  | 1.69537900  | 1.47435200  | I             | 0.12651800  | -3.24761500 | -1.72239700 |
| C | 1.12413000  | 4.32701000  | -3.33236400 | <b>IntA5'</b> |             |             |             |
| H | 0.98217000  | 5.10136500  | -4.08066800 | Pd            | -1.03436300 | 0.40283300  | -0.09353400 |
| C | -3.36279600 | 0.11830900  | -1.27633700 | P             | 1.40078500  | 0.14359100  | -0.00435000 |
| C | 5.62583800  | 0.20712100  | 0.85424300  | C             | 1.34504000  | -1.05804700 | 2.51118500  |
| H | 6.18288600  | -0.02094400 | 1.75853800  | H             | 0.36321200  | -1.41189300 | 2.21151700  |
| C | -2.85319600 | -0.74703300 | 1.43629100  | C             | 3.36508000  | 0.17675800  | 2.03015500  |
| C | 1.04921100  | 1.22020200  | 3.83458100  | H             | 3.95391900  | 0.80252800  | 1.36589800  |
| H | 1.04124000  | 0.50174900  | 4.64946600  | C             | 1.40351500  | -1.33924200 | -2.34879200 |
| C | -5.47370200 | 0.81978900  | -2.23210600 | H             | 0.44244300  | -0.86544700 | -2.52780300 |
| H | -6.36966100 | 1.43166700  | -2.18136800 | C             | 3.31053500  | -1.72969100 | -0.91894500 |
| C | -5.27653100 | -0.04401100 | -3.30891600 | H             | 3.84899900  | -1.55118000 | 0.00683300  |
| H | -6.01980500 | -0.10520100 | -4.09866400 | C             | 3.01258500  | 1.83690900  | -1.61732200 |
| C | -2.60412800 | -1.60298900 | 3.69196500  | H             | 3.14525200  | 0.98857200  | -2.28126700 |
| H | -2.00564400 | -1.70641900 | 4.59268500  | C             | 3.82952100  | -2.61419500 | -1.85904800 |
| C | 0.42913000  | 3.12582000  | -3.43116000 | H             | 4.77043100  | -3.11870800 | -1.66140000 |
| H | -0.25489000 | 2.95521600  | -4.25719700 | C             | 2.26336000  | 1.70155700  | -0.44734000 |
| C | 1.33434900  | 0.78765600  | 2.54444400  | C             | 3.14200000  | -2.85584100 | -3.04586400 |
| H | 1.52540400  | -0.26853100 | 2.36628100  | H             | 3.54731800  | -3.54976400 | -3.77621900 |
| C | -2.50740400 | 3.67157600  | 2.21416000  | C             | 1.86118900  | -1.40987800 | 3.75494000  |
| H | -2.74966400 | 3.96480200  | 3.23157700  | H             | 1.27111000  | -2.02849900 | 4.42398900  |
| C | -1.89211800 | 2.90076100  | -0.37671300 | C             | 2.09494300  | -0.26405200 | 1.63806200  |
| H | -1.66328300 | 2.61237000  | -1.39696200 | C             | 2.09514600  | -1.08399600 | -1.16101400 |
| C | 0.75958900  | 2.56206900  | 4.07316100  | C             | 3.87583900  | -0.17609300 | 3.27495200  |
| H | 0.52453200  | 2.90023600  | 5.07817500  | H             | 4.86106800  | 0.17169900  | 3.57067800  |
| C | 5.54216100  | 0.51169300  | -1.53111400 | C             | 3.12442300  | -0.96950200 | 4.13882700  |
| H | 6.03324900  | 0.52114500  | -2.49977300 | H             | 3.52351600  | -1.24190200 | 5.11137500  |
| C | -1.89990200 | 4.24835700  | -0.04048300 | C             | 1.92918800  | -2.21740000 | -3.29060000 |
| H | -1.66234700 | 4.98997900  | -0.79770200 | H             | 1.38181700  | -2.41466400 | -4.20690600 |

|   |             |             |             |
|---|-------------|-------------|-------------|
| C | 3.59601400  | 3.06157000  | -1.93844500 |
| H | 4.17519500  | 3.15541700  | -2.85209400 |
| C | 2.11049200  | 2.80877100  | 0.39749700  |
| H | 1.53831500  | 2.71497400  | 1.31785100  |
| C | 2.69899400  | 4.02600100  | 0.07875300  |
| H | 2.57536900  | 4.87489900  | 0.74417500  |
| C | 3.44167300  | 4.15554600  | -1.09407100 |
| H | 3.89772500  | 5.10797800  | -1.34661700 |
| C | -3.06971300 | 0.67722500  | -0.23521500 |
| C | -3.84892600 | 0.75100600  | 0.92633500  |
| C | -3.65001100 | 0.83349300  | -1.48684600 |
| C | -5.22020300 | 0.99894900  | 0.79392100  |
| C | -5.01891100 | 1.07526400  | -1.60925900 |
| H | -3.03582100 | 0.76569000  | -2.38101300 |
| C | -5.79692200 | 1.16600600  | -0.46043700 |
| H | -5.83872600 | 1.05603300  | 1.68742400  |
| H | -5.46536300 | 1.19417700  | -2.59172200 |
| H | -6.86341500 | 1.35776600  | -0.53604100 |
| N | -3.24958800 | 0.62207000  | 2.18990900  |
| H | -3.92673200 | 0.49427600  | 2.93232600  |
| H | -2.57433700 | -0.13577000 | 2.21173200  |
| I | -1.53351100 | -2.23255700 | 0.00860100  |
| C | -1.11169100 | 2.32489700  | -0.08381600 |
| O | -1.21226900 | 3.45807300  | -0.06572700 |

**TSA2'**

|    |             |             |             |
|----|-------------|-------------|-------------|
| Pd | -0.98815000 | 0.30490900  | -0.09733400 |
| P  | 1.39107200  | 0.18731000  | -0.01957000 |
| C  | 1.44121200  | -1.13413300 | 2.43029500  |
| H  | 0.54346000  | -1.62701100 | 2.06708500  |
| C  | 3.24397600  | 0.44273700  | 2.10509700  |
| H  | 3.74806600  | 1.18898800  | 1.49850200  |
| C  | 1.49276700  | -1.37395600 | -2.31569300 |
| H  | 0.50029300  | -0.97801100 | -2.51025600 |
| C  | 3.42168100  | -1.57343800 | -0.87448700 |
| H  | 3.94466300  | -1.31906400 | 0.04270700  |
| C  | 3.05526100  | 1.90620400  | -1.54885200 |
| H  | 3.32347400  | 1.03567700  | -2.13882600 |
| C  | 4.00400200  | -2.45351700 | -1.78076300 |
| H  | 4.97865400  | -2.88113800 | -1.56606000 |
| C  | 2.17218900  | 1.78167900  | -0.47476400 |
| C  | 3.33543200  | -2.78988100 | -2.95558200 |
| H  | 3.78939800  | -3.48156600 | -3.65897800 |
| C  | 1.96108800  | -1.46483400 | 3.67760000  |
| H  | 1.45850100  | -2.21028500 | 4.28619700  |

|   |             |             |             |
|---|-------------|-------------|-------------|
| C | 2.08127900  | -0.17746600 | 1.63495500  |
| C | 2.16305900  | -1.02604300 | -1.14006500 |
| C | 3.75714200  | 0.11044500  | 3.35550300  |
| H | 4.65845300  | 0.59874600  | 3.71378300  |
| C | 3.11658300  | -0.84244200 | 4.14301900  |
| H | 3.51750400  | -1.09899900 | 5.11916300  |
| C | 2.08045500  | -2.24969900 | -3.22259300 |
| H | 1.54889200  | -2.52199600 | -4.12887100 |
| C | 3.59642300  | 3.15000400  | -1.86979600 |
| H | 4.27923700  | 3.23636300  | -2.70966700 |
| C | 1.84165600  | 2.91800000  | 0.27441600  |
| H | 1.15752800  | 2.83479700  | 1.11479400  |
| C | 2.38961000  | 4.15442300  | -0.04197100 |
| H | 2.12607600  | 5.02680400  | 0.54797100  |
| C | 3.26701000  | 4.27316700  | -1.11892800 |
| H | 3.69019700  | 5.24077100  | -1.37137300 |
| C | -3.01195600 | 0.93309000  | -0.22011900 |
| C | -3.84855200 | 0.75895100  | 0.89809700  |
| C | -3.55460700 | 1.17054900  | -1.48604200 |
| C | -5.23384400 | 0.86656700  | 0.70911500  |
| C | -4.92848400 | 1.25178900  | -1.66234000 |
| H | -2.88945600 | 1.30907700  | -2.33397100 |
| C | -5.76025700 | 1.11010800  | -0.55079800 |
| H | -5.89828900 | 0.73606700  | 1.55980900  |
| H | -5.34627000 | 1.43372600  | -2.64680800 |
| H | -6.83754100 | 1.18291500  | -0.66869200 |
| N | -3.30467200 | 0.52651400  | 2.15394200  |
| H | -3.98289200 | 0.25314200  | 2.85279200  |
| H | -2.52075300 | -0.11714800 | 2.14072800  |
| I | -1.49694400 | -2.37058100 | -0.02525200 |
| C | -1.47360400 | 2.12210700  | 0.05233500  |
| O | -1.54834700 | 3.26142500  | 0.21447400  |

**IntA8**

|    |             |             |             |
|----|-------------|-------------|-------------|
| Pd | -0.58598400 | -0.07757300 | 0.61246900  |
| P  | 0.24580200  | 2.00639000  | 0.04677300  |
| P  | 1.43281400  | -1.43871600 | 0.07053000  |
| C  | 2.68507200  | 2.23387600  | -3.30299300 |
| H  | 3.65172200  | 2.64586100  | -3.57658400 |
| C  | 1.21040600  | -2.04039900 | 2.79011800  |
| H  | 0.20588200  | -1.63452400 | 2.69477400  |
| C  | 3.35930900  | -2.56674700 | 1.83451600  |
| H  | 4.04132600  | -2.57401700 | 0.98936200  |
| C  | 1.86139000  | 1.87242800  | 2.29459100  |
| H  | 1.32673600  | 0.94577500  | 2.48538900  |

|   |             |             |             |
|---|-------------|-------------|-------------|
| C | 0.00998200  | -2.81407300 | -1.85100600 |
| H | -0.49035200 | -1.86229900 | -2.01523000 |
| C | 2.21944800  | 3.83875800  | 0.94609200  |
| H | 1.95871700  | 4.46268900  | 0.09614300  |
| C | 1.53594800  | 2.63617300  | 1.16960500  |
| C | 1.59730100  | -4.19195400 | -0.65950100 |
| H | 2.35723700  | -4.31320900 | 0.10647800  |
| C | 3.22742600  | 4.24734400  | 1.81299100  |
| H | 3.75276700  | 5.17902200  | 1.62642000  |
| C | -2.10075400 | 3.06674100  | -0.96264400 |
| H | -2.19958100 | 2.11636800  | -1.48130400 |
| C | 3.24700000  | -1.13267800 | -2.06808600 |
| H | 2.59073500  | -1.78831500 | -2.63161800 |
| C | -1.01362000 | 3.32200300  | -0.11855100 |
| C | 1.20706700  | -5.28814000 | -1.42130000 |
| H | 1.67050100  | -6.25505200 | -1.24849300 |
| C | 2.94801100  | -0.81020800 | -0.74335400 |
| C | 0.21982800  | -5.15049600 | -2.39721200 |
| H | -0.08679600 | -6.01252200 | -2.98241600 |
| C | 2.22083500  | 2.39016300  | -2.00028400 |
| H | 2.84620600  | 2.90240600  | -1.27890700 |
| C | -3.04040500 | 5.21971400  | -0.41478300 |
| H | -3.82864900 | 5.95808300  | -0.52929200 |
| C | -0.96493300 | 4.51884800  | 0.59724800  |
| H | -0.15929700 | 4.71286200  | 1.29658000  |
| C | 1.63955500  | -2.52110900 | 4.02430600  |
| H | 0.96616900  | -2.49431200 | 4.87558600  |
| C | 0.98532800  | 1.85732400  | -1.62643400 |
| C | 3.55776200  | 3.46661300  | 2.91908600  |
| H | 4.34534400  | 3.78786000  | 3.59419200  |
| C | 2.06296100  | -2.05995900 | 1.68020600  |
| C | -3.10469900 | 4.01514000  | -1.11165300 |
| H | -3.94438400 | 3.79792900  | -1.76417300 |
| C | 0.99968900  | -2.94412900 | -0.87174600 |
| C | 0.70858300  | 0.98412100  | -3.86989800 |
| H | 0.10741400  | 0.42731400  | -4.58228100 |
| C | 3.78742200  | -3.04759400 | 3.06763400  |
| H | 4.79561100  | -3.43714500 | 3.17237200  |
| C | 2.92865400  | -3.02625200 | 4.16443600  |
| H | 3.26620500  | -3.39853900 | 5.12703200  |
| C | -0.37995600 | -3.91345000 | -2.61105800 |
| H | -1.16762700 | -3.78942200 | -3.34776000 |
| C | 2.86877700  | 2.28252800  | 3.16350700  |
| H | 3.11186500  | 1.67433700  | 4.02935400  |

|   |             |             |             |
|---|-------------|-------------|-------------|
| C | 0.24147900  | 1.13692700  | -2.56939900 |
| H | -0.71132500 | 0.68104900  | -2.30538500 |
| C | 4.38898000  | -0.61498100 | -2.67355000 |
| H | 4.60964500  | -0.87229400 | -3.70498100 |
| C | 3.79870300  | 0.05246900  | -0.04097500 |
| H | 3.57910600  | 0.31968200  | 0.98818300  |
| C | 1.92897800  | 1.53949800  | -4.24236900 |
| H | 2.29726000  | 1.42051400  | -5.25727900 |
| C | -1.97390400 | 5.46596000  | 0.44334600  |
| H | -1.92840800 | 6.39298800  | 1.00727500  |
| C | 4.93920400  | 0.56429200  | -0.64778900 |
| H | 5.59147500  | 1.22791600  | -0.08782200 |
| C | 5.23946100  | 0.22793200  | -1.96583100 |
| H | 6.13120600  | 0.62632200  | -2.44082200 |
| C | -2.03916500 | 0.73131400  | 1.76267500  |
| O | -2.05546700 | 1.83666000  | 2.24024100  |
| C | -3.03204900 | -0.31426200 | 2.19687000  |
| C | -2.89222300 | -1.61486000 | 1.72270600  |
| C | -4.05906500 | -0.00312100 | 3.08953900  |
| C | -3.75227500 | -2.61973300 | 2.15084300  |
| C | -4.92235100 | -1.00182500 | 3.51971700  |
| C | -4.76294200 | -2.30817400 | 3.05524400  |
| H | -3.64713000 | -3.62887600 | 1.76306400  |
| H | -5.71839800 | -0.76866400 | 4.21977600  |
| H | -5.43972500 | -3.08860600 | 3.38955900  |
| H | -4.15190500 | 1.01923500  | 3.44058300  |
| N | -1.85744500 | -1.83443500 | 0.75016500  |
| H | -1.44404200 | -2.76248500 | 0.82012100  |
| I | -3.25100800 | -0.76950500 | -2.27925100 |
| H | -2.27754000 | -1.74932700 | -0.20296000 |

### IntA9

|    |             |             |             |
|----|-------------|-------------|-------------|
| Pd | -0.59994000 | -0.34448800 | -0.59233600 |
| P  | -0.21410200 | 1.93969100  | -0.21758700 |
| P  | 1.73857900  | -1.18436900 | 0.02625700  |
| C  | 2.85759200  | 3.18799600  | -2.69289300 |
| H  | 3.93216200  | 3.33210900  | -2.63385700 |
| C  | 0.61363700  | -2.42814900 | 2.22039700  |
| H  | -0.30326700 | -2.34433000 | 1.64335600  |
| C  | 2.99043000  | -2.08346300 | 2.43799600  |
| H  | 3.93499100  | -1.72370900 | 2.04163800  |
| C  | 0.55738600  | 1.31107800  | 2.36662000  |
| H  | -0.04569200 | 0.42198300  | 2.21154100  |
| C  | 1.60091800  | -2.53849000 | -2.40724300 |
| H  | 0.92082100  | -1.74125700 | -2.69259000 |



|   |             |             |             |
|---|-------------|-------------|-------------|
| C | 1.46264500  | 3.39752600  | 1.56959900  |
| H | 1.55982500  | 4.15169800  | 0.79438600  |
| C | 0.70067100  | 2.24785200  | 1.33901200  |
| C | 2.97728200  | -3.62010400 | -0.74568200 |
| H | 3.38965200  | -3.66142500 | 0.25807600  |
| C | 2.10919400  | 3.57718700  | 2.78764400  |
| H | 2.70976200  | 4.46701200  | 2.95181100  |
| C | -1.40215000 | 4.48897700  | -0.40522800 |
| H | -0.46630700 | 4.82145200  | -0.84523100 |
| C | 3.99350100  | -0.11515100 | -1.27277500 |
| H | 3.71631100  | -0.75125300 | -2.10727400 |
| C | -1.58460400 | 3.14369200  | -0.07201500 |
| C | 3.28301000  | -4.62593100 | -1.65650500 |
| H | 3.93273400  | -5.44338100 | -1.35838700 |
| C | 3.25570800  | -0.15228700 | -0.08502300 |
| C | 2.75561400  | -4.58596900 | -2.94553100 |
| H | 2.99377600  | -5.37338400 | -3.65455600 |
| C | 2.16395300  | 2.78051600  | -1.55501400 |
| H | 2.71380200  | 2.60673000  | -0.63688300 |
| C | -3.63377400 | 4.99072000  | 0.35963200  |
| H | -4.43223000 | 5.70843300  | 0.52375300  |
| C | -2.79958800 | 2.73209900  | 0.47612500  |
| H | -2.95871000 | 1.68878300  | 0.72406700  |
| C | 0.57967500  | -3.01299000 | 3.48207800  |
| H | -0.36648800 | -3.36588800 | 3.88046800  |
| C | 0.78297200  | 2.58622800  | -1.60817400 |
| C | 1.98088200  | 2.62459600  | 3.79826400  |
| H | 2.48697800  | 2.76954500  | 4.74817500  |
| C | 1.81561700  | -1.94819600 | 1.68986900  |
| C | -2.42480800 | 5.40752700  | -0.19177000 |
| H | -2.27697700 | 6.44961100  | -0.45942900 |
| C | 2.13447700  | -2.56684800 | -1.11418300 |
| C | 0.80523900  | 3.18830200  | -3.95239300 |
| H | 0.27140300  | 3.33940500  | -4.88579700 |
| C | 2.95498600  | -2.66821100 | 3.70052900  |
| H | 3.87214700  | -2.76264400 | 4.27447400  |
| C | 1.75002200  | -3.12819400 | 4.22710800  |
| H | 1.72481700  | -3.57671800 | 5.21584300  |
| C | 1.91635200  | -3.54090400 | -3.32057600 |
| H | 1.49338200  | -3.50950700 | -4.31989800 |
| C | 1.19256500  | 1.49634400  | 3.59156900  |
| H | 1.07728300  | 0.74997100  | 4.37136900  |
| C | 0.10724200  | 2.78175200  | -2.82224300 |
| H | -0.96310100 | 2.60267800  | -2.87675000 |

|   |             |             |             |
|---|-------------|-------------|-------------|
| C | 5.08813400  | 0.73482300  | -1.40037000 |
| H | 5.64764400  | 0.74916200  | -2.33091500 |
| C | 3.63890900  | 0.68437500  | 0.97102800  |
| H | 3.08429100  | 0.68062900  | 1.90269800  |
| C | 2.18256400  | 3.39667400  | -3.88990800 |
| H | 2.72612900  | 3.71462900  | -4.77486000 |
| C | -3.81893300 | 3.65234600  | 0.69422200  |
| H | -4.76061500 | 3.31696700  | 1.11745100  |
| C | 4.73517500  | 1.53100500  | 0.84222300  |
| H | 5.01146700  | 2.17172600  | 1.67419700  |
| C | 5.46275900  | 1.56159700  | -0.34517900 |
| H | 6.31801700  | 2.22338800  | -0.44575400 |
| C | -2.35318800 | -0.01394200 | -1.63114700 |
| O | -2.65041300 | 1.06200100  | -2.09324300 |
| C | -3.07099700 | -1.26997400 | -1.85624900 |
| C | -2.39214000 | -2.44669600 | -1.46093000 |
| C | -4.33127800 | -1.31557800 | -2.46711800 |
| C | -3.02789200 | -3.68644700 | -1.72274700 |
| C | -4.94313400 | -2.53302200 | -2.69727100 |
| C | -4.27243900 | -3.71133100 | -2.31995400 |
| H | -2.53347500 | -4.61092400 | -1.43550400 |
| H | -5.92068300 | -2.58454900 | -3.16499600 |
| H | -4.74725400 | -4.67278500 | -2.50116000 |
| H | -4.80509700 | -0.38100100 | -2.75277000 |
| N | -1.19169700 | -2.28790600 | -0.87182200 |
| H | -0.66129300 | -3.13176100 | -0.69921200 |
| I | -3.06331100 | -0.95637600 | 2.24151000  |
| H | -2.01056900 | -0.67548100 | 0.91387800  |

### IntA11

|    |             |             |             |
|----|-------------|-------------|-------------|
| Pd | -0.10666700 | -0.31163500 | 0.95441400  |
| P  | -1.25467600 | 0.90934600  | -0.65994500 |
| P  | 2.29249200  | 0.07331700  | 0.40727400  |
| C  | 0.69383500  | 1.80828600  | -4.20689000 |
| H  | 0.90244800  | 2.68113200  | -4.81825100 |
| C  | 2.71800200  | -0.10817900 | 3.15414700  |
| H  | 1.89334100  | -0.81495300 | 3.13066700  |
| C  | 4.19181400  | 1.43943100  | 2.03665700  |
| H  | 4.51910700  | 1.95028200  | 1.13577300  |
| C  | -0.93174900 | 3.08544100  | 1.06293300  |
| H  | -0.48927400 | 2.35914900  | 1.73989800  |
| C  | 2.70650600  | -2.39665400 | -0.81094900 |
| H  | 1.61896500  | -2.48426500 | -0.81060000 |
| C  | -2.01637400 | 3.61203600  | -1.02323400 |
| H  | -2.44607300 | 3.29698900  | -1.96969300 |

|   |             |             |             |
|---|-------------|-------------|-------------|
| C | -1.40932000 | 2.66901200  | -0.18225400 |
| C | 4.72997900  | -1.19532300 | -0.24953000 |
| H | 5.22344500  | -0.33034700 | 0.18465400  |
| C | -2.09745100 | 4.94697100  | -0.64434900 |
| H | -2.56540300 | 5.66748000  | -1.30823700 |
| C | -3.14148300 | -0.69186400 | -1.95062200 |
| H | -2.30472100 | -1.31104400 | -2.25092100 |
| C | 3.32356800  | 1.41819000  | -1.87783800 |
| H | 3.68214100  | 0.45535900  | -2.22637100 |
| C | -2.95309200 | 0.45097800  | -1.16851000 |
| C | 5.49334500  | -2.22746500 | -0.78020900 |
| H | 6.57725100  | -2.16209600 | -0.76216000 |
| C | 2.65022100  | 1.51769200  | -0.66081100 |
| C | 4.86711300  | -3.34800700 | -1.32635400 |
| H | 5.46511200  | -4.15744200 | -1.73509400 |
| C | -0.01847600 | 1.95988900  | -3.02104400 |
| H | -0.33158600 | 2.95235200  | -2.71962800 |
| C | -5.52813600 | -0.34522500 | -1.90525600 |
| H | -6.52912000 | -0.65432400 | -2.19232800 |
| C | -4.06863100 | 1.17093600  | -0.72747400 |
| H | -3.94837800 | 2.03080300  | -0.07738100 |
| C | 3.34578500  | 0.16850900  | 4.36481200  |
| H | 3.00597700  | -0.32470700 | 5.27031100  |
| C | -0.28572700 | 0.84974400  | -2.21769700 |
| C | -1.59095100 | 5.35570600  | 0.58830400  |
| H | -1.65790600 | 6.39836000  | 0.88443400  |
| C | 3.13773500  | 0.52108600  | 1.97712100  |
| C | -4.42345800 | -1.08839100 | -2.31289700 |
| H | -4.54563500 | -1.99203700 | -2.90123200 |
| C | 3.33124700  | -1.27129300 | -0.26746200 |
| C | 0.91830500  | -0.54950800 | -3.78357900 |
| H | 1.29329600  | -1.52936900 | -4.06403000 |
| C | 4.81650300  | 1.71666600  | 3.24887300  |
| H | 5.63194300  | 2.43324300  | 3.28221800  |
| C | 4.39575100  | 1.08112700  | 4.41429300  |
| H | 4.88188900  | 1.30130600  | 5.36012700  |
| C | 3.47939000  | -3.43175800 | -1.33709100 |
| H | 2.98554400  | -4.30672600 | -1.74849100 |
| C | -1.01835700 | 4.42192700  | 1.44573800  |
| H | -0.64115700 | 4.72794800  | 2.41672300  |
| C | 0.20565400  | -0.40554300 | -2.59786600 |
| H | 0.03720400  | -1.26946900 | -1.95719700 |
| C | 3.52664300  | 2.55395600  | -2.65947600 |
| H | 4.04839600  | 2.46244200  | -3.60740300 |

|   |             |             |             |
|---|-------------|-------------|-------------|
| C | 2.17565300  | 2.76754100  | -0.24545600 |
| H | 1.65622600  | 2.86058900  | 0.70293800  |
| C | 1.15557600  | 0.55492300  | -4.59642500 |
| H | 1.71320500  | 0.44316500  | -5.52180500 |
| C | -5.34810400 | 0.78080000  | -1.10761100 |
| H | -6.20533800 | 1.34739500  | -0.75702800 |
| C | 2.37072500  | 3.89698500  | -1.02908800 |
| H | 1.98633200  | 4.85550100  | -0.69305700 |
| C | 3.05273100  | 3.79206100  | -2.24027900 |
| H | 3.20911200  | 4.67284600  | -2.85625300 |
| C | -1.61405200 | -0.25211400 | 2.25034700  |
| O | -0.97329700 | 0.10448500  | 3.21438100  |
| C | -3.03744100 | -0.50605700 | 2.16717400  |
| C | -3.58698000 | -1.52844600 | 1.34822000  |
| C | -3.87537000 | 0.32375100  | 2.94372800  |
| C | -5.00117400 | -1.63409200 | 1.31694700  |
| C | -5.24499500 | 0.20834300  | 2.87807800  |
| C | -5.79730700 | -0.78689300 | 2.05006300  |
| H | -5.44213400 | -2.40036100 | 0.68687100  |
| H | -5.88486600 | 0.86413900  | 3.45852700  |
| H | -6.87707500 | -0.89319200 | 1.98760300  |
| H | -3.41003200 | 1.07676500  | 3.57281600  |
| N | -2.83071300 | -2.42445100 | 0.68926500  |
| H | -3.21987800 | -2.96231600 | -0.08051400 |
| H | -1.83667100 | -2.28281600 | 0.49975200  |
| C | 0.64381500  | -3.69170200 | 1.55294600  |
| O | 0.87566900  | -4.76097100 | 1.16443100  |
| O | 0.46571800  | -2.65094100 | 2.06206500  |
| C | -0.95647200 | -3.63999700 | -1.48869200 |
| O | -0.41814700 | -2.85532100 | -0.62519500 |
| O | -2.17210300 | -3.75763300 | -1.70797000 |
| C | 0.02886300  | -4.47522900 | -2.30777800 |
| H | -0.49423900 | -5.10990300 | -3.02544300 |
| H | 0.72366100  | -3.81484000 | -2.84127800 |
| H | 0.62466700  | -5.09703400 | -1.63043800 |

### TSA3

|    |             |             |             |
|----|-------------|-------------|-------------|
| Pd | 0.17950100  | -0.25596700 | -0.91107900 |
| P  | 0.92212700  | 1.33927700  | 0.60458500  |
| P  | -2.27412000 | -0.38517600 | -0.49877900 |
| C  | -1.48077000 | 2.54647700  | 3.74048300  |
| H  | -1.86676400 | 3.47831500  | 4.14275200  |
| C  | -2.50447600 | -1.36924400 | -3.08961100 |
| H  | -1.62291600 | -1.94990600 | -2.83273800 |
| C  | -4.19430400 | 0.25373700  | -2.51037500 |

|   |             |             |             |               |             |             |             |
|---|-------------|-------------|-------------|---------------|-------------|-------------|-------------|
| H | -4.63391000 | 0.94937700  | -1.80186800 | H             | -2.39478900 | -4.23507200 | 2.58756500  |
| C | 0.56451200  | 3.36349200  | -1.29187100 | C             | 0.61367100  | 4.67539900  | -1.75823900 |
| H | 0.19525900  | 2.57417300  | -1.93796800 | H             | 0.25648500  | 4.90288800  | -2.75786700 |
| C | -2.35365600 | -2.57171300 | 1.23363200  | C             | -0.52785300 | 0.16452900  | 2.66148100  |
| H | -1.26703300 | -2.49304200 | 1.27851300  | H             | -0.17027800 | -0.77958000 | 2.25139400  |
| C | 1.56925400  | 4.07042900  | 0.78620000  | C             | -4.17981400 | 2.48706200  | 1.78899800  |
| H | 1.96401000  | 3.83406800  | 1.77050900  | H             | -4.78734800 | 2.52878600  | 2.68808500  |
| C | 1.02611100  | 3.05329300  | -0.01145200 | C             | -2.60449800 | 2.36567800  | -0.49044000 |
| C | -4.50485900 | -1.85723800 | 0.38376300  | H             | -1.99680900 | 2.32111900  | -1.38929900 |
| H | -5.09799400 | -1.19912400 | -0.24560300 | C             | -1.81754400 | 1.33424100  | 4.33429000  |
| C | 1.61465400  | 5.37867100  | 0.32036300  | H             | -2.45798400 | 1.31662700  | 5.21144100  |
| H | 2.03354500  | 6.15999200  | 0.94709900  | C             | 5.00910000  | 1.22670800  | 0.99294100  |
| C | 2.81800700  | -0.07575500 | 2.10837500  | H             | 5.85974800  | 1.72978900  | 0.54369200  |
| H | 1.97885800  | -0.62383900 | 2.51733800  | C             | -3.04040100 | 3.59664500  | -0.01869300 |
| C | -3.73645500 | 1.25183600  | 1.31986700  | H             | -2.75366600 | 4.50448900  | -0.54110900 |
| H | -3.99622900 | 0.34762200  | 1.85990600  | C             | -3.83526000 | 3.65881900  | 1.12475700  |
| C | 2.61249000  | 0.97976600  | 1.21502900  | H             | -4.17872500 | 4.61897900  | 1.49845300  |
| C | -5.13257600 | -2.84976300 | 1.12515600  | C             | 1.81095600  | 0.12972500  | -2.00706600 |
| H | -6.21166300 | -2.96153500 | 1.07469500  | O             | 1.46708700  | 0.79210800  | -2.95675400 |
| C | -2.94875100 | 1.18109600  | 0.17168500  | C             | 3.17716200  | -0.40683700 | -1.83854000 |
| C | -4.37459400 | -3.70443300 | 1.92635000  | C             | 3.49700500  | -1.51615300 | -1.03308600 |
| H | -4.86585600 | -4.48230200 | 2.50402100  | C             | 4.19294100  | 0.25378200  | -2.54889200 |
| C | -0.66577400 | 2.57604000  | 2.61294500  | C             | 4.83313500  | -1.93461600 | -0.96881500 |
| H | -0.44718300 | 3.52928000  | 2.14604000  | C             | 5.50987000  | -0.15635800 | -2.45876100 |
| C | 5.20496000  | 0.16830900  | 1.87598500  | C             | 5.82344600  | -1.26144400 | -1.66292100 |
| H | 6.21203700  | -0.15756800 | 2.11859300  | H             | 5.07732300  | -2.79147600 | -0.34846800 |
| C | 3.72084200  | 1.62478100  | 0.65348900  | H             | 6.28656200  | 0.36901900  | -3.00483700 |
| H | 3.58597000  | 2.42651000  | -0.06557200 | H             | 6.85269000  | -1.59886600 | -1.58274100 |
| C | -3.07606500 | -1.51192100 | -4.35020700 | H             | 3.91523700  | 1.10132600  | -3.16706000 |
| H | -2.63375800 | -2.19961600 | -5.06450100 | N             | 2.52498200  | -2.26099700 | -0.36299400 |
| C | -0.16738300 | 1.38554300  | 2.07762600  | H             | 2.88805700  | -2.92043700 | 0.34895400  |
| C | 1.12963800  | 5.68357400  | -0.95105200 | H             | 1.83329700  | -1.73970500 | 0.18794700  |
| H | 1.16800600  | 6.70607700  | -1.31491000 | C             | 1.13054000  | -3.26790300 | -1.50518600 |
| C | -3.06043000 | -0.48547700 | -2.15725800 | O             | 1.40750500  | -4.40247400 | -1.40022600 |
| C | 4.10787200  | -0.48478000 | 2.42920900  | O             | 0.45997800  | -2.36429400 | -1.93520600 |
| H | 4.23884900  | -1.34017600 | 3.08309300  | C             | 1.40921100  | -3.29418400 | 2.26756100  |
| C | -3.11269800 | -1.70611900 | 0.44319800  | O             | 0.71591000  | -2.44754100 | 1.61098900  |
| C | -1.34622600 | 0.14510200  | 3.78609500  | O             | 2.60472900  | -3.57940000 | 2.05152800  |
| H | -1.61925900 | -0.81066000 | 4.22357800  | C             | 0.67766900  | -4.03149100 | 3.38961000  |
| C | -4.76117400 | 0.11030900  | -3.77349600 | H             | 1.38380100  | -4.45591200 | 4.10655600  |
| H | -5.64049500 | 0.69083600  | -4.03690800 | H             | -0.02618400 | -3.36417700 | 3.89732400  |
| C | -4.20360300 | -0.77174800 | -4.69515700 | H             | 0.10110500  | -4.85343500 | 2.94801300  |
| H | -4.64569100 | -0.87994200 | -5.68119400 |               |             |             |             |
| C | -2.99221400 | -3.56622600 | 1.97501900  |               |             |             |             |
|   |             |             |             | <b>IntA12</b> |             |             |             |
|   |             |             |             | Pd            | -0.19752500 | -0.11111600 | 1.04549700  |

|   |             |             |             |   |             |             |             |
|---|-------------|-------------|-------------|---|-------------|-------------|-------------|
| P | -0.75196400 | 1.67379000  | -0.31324500 | C | 0.54547400  | 0.12466200  | -3.85626400 |
| P | 2.16195100  | -0.54540500 | 0.32828300  | H | 0.56194400  | -0.86821500 | -4.29590000 |
| C | 1.04845900  | 2.47418900  | -3.96220600 | C | 5.45055400  | -0.68027700 | 2.82521300  |
| H | 1.46616900  | 3.32671700  | -4.48932200 | H | 6.48556900  | -0.35084000 | 2.81339600  |
| C | 2.78770600  | -1.51772100 | 2.85168600  | C | 4.95026000  | -1.38015900 | 3.92094700  |
| H | 1.74891400  | -1.84173000 | 2.86679000  | H | 5.59605300  | -1.59767900 | 4.76689700  |
| C | 4.62515900  | -0.40048300 | 1.74102200  | C | 1.45545400  | -4.00396600 | -1.73198800 |
| H | 5.02199700  | 0.15141700  | 0.89379200  | H | 0.58532600  | -4.62506800 | -1.92382500 |
| C | 0.34063700  | 3.32426300  | 1.63280200  | C | 0.71257400  | 4.53843100  | 2.20361800  |
| H | 0.53420400  | 2.39402200  | 2.15891100  | H | 1.21469400  | 4.54798300  | 3.16598700  |
| C | 1.31273100  | -2.82796800 | -1.00018100 | C | 0.03648700  | 0.29512700  | -2.57396500 |
| H | 0.33351500  | -2.53378000 | -0.64432200 | H | -0.33471300 | -0.57063700 | -2.03609200 |
| C | -0.62846100 | 4.50239600  | -0.23651700 | C | 3.96994500  | 1.85895100  | -2.52001100 |
| H | -1.19205600 | 4.49764900  | -1.16534700 | H | 4.31444700  | 1.77686600  | -3.54654600 |
| C | -0.30813700 | 3.29372300  | 0.39595700  | C | 3.06283700  | 2.05664100  | 0.09335800  |
| C | 3.68892600  | -2.44841100 | -1.12359400 | H | 2.72019800  | 2.13913300  | 1.12037000  |
| H | 4.56580800  | -1.86089300 | -0.86498100 | C | 1.04453700  | 1.21745400  | -4.55894300 |
| C | -0.25247600 | 5.71405700  | 0.33171400  | H | 1.44648800  | 1.08758600  | -5.55952500 |
| H | -0.49965200 | 6.64483200  | -0.16971900 | C | -4.73183500 | 2.72990600  | -0.12352600 |
| C | -3.17031500 | 0.86023800  | -1.46525900 | H | -5.33601700 | 3.45749700  | 0.41034700  |
| H | -2.57927300 | 0.10907000  | -1.97839800 | C | 3.59592400  | 3.17282200  | -0.53821800 |
| C | 3.42401600  | 0.74232600  | -1.89066800 | H | 3.64674000  | 4.11755900  | -0.00515300 |
| H | 3.33925800  | -0.19089400 | -2.43696000 | C | 4.05625300  | 3.07437800  | -1.84973700 |
| C | -2.55572400 | 1.80458800  | -0.63579500 | H | 4.47548500  | 3.94377100  | -2.34775300 |
| C | 3.83246000  | -3.61265900 | -1.86856900 | C | -1.89632100 | 0.21221700  | 2.04583900  |
| H | 4.81923200  | -3.92401600 | -2.19820800 | O | -1.88058800 | 1.11170000  | 2.84956100  |
| C | 2.96977700  | 0.82934500  | -0.57459600 | C | -3.09230700 | -0.64158100 | 1.80640800  |
| C | 2.71551000  | -4.39120400 | -2.17437200 | C | -3.09394900 | -1.95455400 | 1.29670900  |
| H | 2.83476100  | -5.30981700 | -2.74134600 | C | -4.31904900 | -0.00270400 | 2.04512500  |
| C | 0.53669100  | 2.64847800  | -2.67949000 | C | -4.32761500 | -2.54851100 | 0.98631300  |
| H | 0.58722500  | 3.62917500  | -2.22191800 | C | -5.52798600 | -0.59953000 | 1.73723500  |
| C | -5.33546400 | 1.79588500  | -0.95806300 | C | -5.52371300 | -1.88074700 | 1.18923700  |
| H | -6.41439100 | 1.78947700  | -1.08024400 | H | -4.33141700 | -3.55341200 | 0.57253200  |
| C | -3.34956500 | 2.73009700  | 0.04687600  | H | -6.46001900 | -0.07197900 | 1.91193300  |
| H | -2.89750500 | 3.44493500  | 0.72619400  | H | -6.45726400 | -2.37122900 | 0.92927800  |
| C | 3.62256300  | -1.79777000 | 3.93049300  | H | -4.28739500 | 0.99995500  | 2.45673400  |
| H | 3.22667800  | -2.34327500 | 4.78165800  | N | -1.94911400 | -2.72587800 | 1.00759000  |
| C | 0.00459200  | 1.56295600  | -1.98116800 | H | -2.19336100 | -3.66547200 | 0.70361700  |
| C | 0.42834500  | 5.73221600  | 1.54803600  | H | -1.86303800 | -2.25882400 | -0.75221500 |
| H | 0.71894700  | 6.67950100  | 1.99254900  | C | -0.74265500 | -2.83971800 | 1.81515400  |
| C | 3.28910000  | -0.81719100 | 1.74850400  | O | -0.21663900 | -3.93726700 | 1.82520300  |
| C | -4.55081800 | 0.85693100  | -1.62279500 | O | -0.34410400 | -1.76604700 | 2.39476800  |
| H | -5.01421800 | 0.11041300  | -2.26040500 | C | -2.12182900 | -3.39901500 | -2.25382600 |
| C | 2.42039400  | -2.03681800 | -0.69731100 | O | -1.86835800 | -2.18763100 | -1.74314500 |

|   |             |             |             |
|---|-------------|-------------|-------------|
| O | -2.41813400 | -4.35717000 | -1.57382800 |
| C | -1.95092100 | -3.41958500 | -3.74945600 |
| H | -2.37616700 | -4.33557600 | -4.15945700 |
| H | -2.41479300 | -2.54083800 | -4.20475100 |
| H | -0.87898700 | -3.38562600 | -3.97498400 |

**IntA13'**

|    |             |             |             |
|----|-------------|-------------|-------------|
| Pd | 0.94047400  | 0.65102000  | -0.51113500 |
| P  | -1.14079900 | -0.27024500 | 0.00038900  |
| C  | -4.01752300 | -0.98113500 | -2.86984000 |
| H  | -5.04819900 | -0.69721800 | -3.06040100 |
| C  | -2.47561400 | 2.14893400  | 0.39204000  |
| H  | -1.81513200 | 2.52284700  | -0.38407700 |
| C  | -3.14891000 | 0.37014700  | 1.88499400  |
| H  | -3.05226000 | -0.64846300 | 2.24636800  |
| C  | -2.33494500 | 0.83132400  | 0.84483100  |
| C  | -4.08955000 | 1.21636500  | 2.46550700  |
| H  | -4.71339700 | 0.85004600  | 3.27535800  |
| C  | -1.84615100 | -2.85087300 | 0.92549900  |
| H  | -2.51904600 | -2.91066200 | 0.07551900  |
| C  | -1.04950600 | -1.72018400 | 1.10795100  |
| C  | -3.37273700 | -0.50688200 | -1.72961100 |
| H  | -3.90602400 | 0.14144200  | -1.04191800 |
| C  | -0.91196200 | -3.83974000 | 2.91898300  |
| H  | -0.85591200 | -4.66657900 | 3.62084700  |
| C  | -0.18156600 | -1.65775800 | 2.20226600  |
| H  | 0.45220300  | -0.78441500 | 2.33859500  |
| C  | -2.04525600 | -0.86121600 | -1.47732300 |
| C  | -4.22973600 | 2.52416800  | 2.00998000  |
| H  | -4.96421700 | 3.18265100  | 2.46462800  |
| C  | -1.77396700 | -3.90855600 | 1.82888300  |
| H  | -2.39166300 | -4.78859000 | 1.67682400  |
| C  | -2.02270000 | -2.17419000 | -3.50694600 |
| H  | -1.49450000 | -2.82678300 | -4.19561000 |
| C  | -3.42236400 | 2.98667200  | 0.97377200  |
| H  | -3.52177200 | 4.00806600  | 0.61792300  |
| C  | -1.37091700 | -1.69938700 | -2.37472200 |
| H  | -0.34558300 | -1.99158800 | -2.16805100 |
| C  | -3.34517600 | -1.81347100 | -3.75879800 |
| H  | -3.85006200 | -2.18167900 | -4.64712900 |
| C  | -0.11606800 | -2.71107400 | 3.10619600  |
| H  | 0.56217400  | -2.65488100 | 3.95220300  |
| C  | 1.83493400  | -1.12132100 | -0.48664200 |
| O  | 1.37780200  | -2.22216100 | -0.69868400 |
| C  | 3.30719700  | -0.95232700 | -0.19357000 |

|   |             |             |             |
|---|-------------|-------------|-------------|
| C | 3.84938900  | 0.32465700  | -0.32095800 |
| C | 4.11506300  | -2.02318500 | 0.18754400  |
| C | 5.19627400  | 0.54963900  | -0.06033200 |
| C | 5.45961200  | -1.80150800 | 0.46216500  |
| C | 5.99578900  | -0.51880800 | 0.33987800  |
| H | 5.61118400  | 1.54795000  | -0.16333700 |
| H | 6.09404900  | -2.62535200 | 0.77417400  |
| H | 7.04613600  | -0.34867300 | 0.55647700  |
| H | 3.67233800  | -3.01064200 | 0.26992000  |
| N | 2.93916200  | 1.35572100  | -0.74446300 |
| H | 2.87804500  | 2.20778500  | -0.14175300 |
| H | 3.12986600  | 1.66877000  | -1.69465300 |
| O | 2.02381500  | 3.59966800  | 0.46767600  |
| C | 0.86908800  | 3.64906600  | 0.00758200  |
| C | 0.04826700  | 4.91749500  | 0.19305400  |
| H | -0.76165700 | 4.71090500  | 0.90234600  |
| H | 0.66705800  | 5.72877000  | 0.57973600  |
| H | -0.41217700 | 5.21062100  | -0.75507100 |
| O | 0.25948400  | 2.71140000  | -0.62094500 |

**TSA4'**

|    |             |             |             |
|----|-------------|-------------|-------------|
| Pd | 0.96732400  | 0.48460200  | -0.60672000 |
| P  | -1.16803900 | -0.30561400 | -0.04209700 |
| C  | -4.08013200 | -1.84503200 | -2.52717900 |
| H  | -5.14643400 | -1.71860800 | -2.68957500 |
| C  | -2.55189200 | 2.04101600  | -0.60237600 |
| H  | -2.08308200 | 1.95832800  | -1.57745700 |
| C  | -2.89817200 | 1.20096300  | 1.63269800  |
| H  | -2.71812500 | 0.45584200  | 2.40109800  |
| C  | -2.30712900 | 1.06792700  | 0.37447700  |
| C  | -3.72122800 | 2.29080600  | 1.91044600  |
| H  | -4.17323400 | 2.38507600  | 2.89332300  |
| C  | -2.20324900 | -2.35095500 | 1.61204900  |
| H  | -2.94005300 | -2.52633800 | 0.83383900  |
| C  | -1.21818900 | -1.37648700 | 1.43655800  |
| C  | -3.43805300 | -1.09375200 | -1.54647100 |
| H  | -4.00790300 | -0.38573200 | -0.95239300 |
| C  | -1.29441300 | -2.89204400 | 3.78066800  |
| H  | -1.32194400 | -3.48501300 | 4.69012400  |
| C  | -0.26825600 | -1.17095300 | 2.44113300  |
| H  | 0.51199300  | -0.42710700 | 2.29937600  |
| C  | -2.06439200 | -1.24489500 | -1.33172900 |
| C  | -3.96646600 | 3.24947400  | 0.93296700  |
| H  | -4.61075400 | 4.09648300  | 1.14998900  |
| C  | -2.23860400 | -3.10677200 | 2.78019000  |

|                |             |             |             |   |             |             |             |
|----------------|-------------|-------------|-------------|---|-------------|-------------|-------------|
| H              | -3.00333000 | -3.86730900 | 2.90631200  | H | -3.95711300 | 2.67136800  | 2.75063700  |
| C              | -1.99005600 | -2.91039800 | -3.08216000 | C | -2.14703600 | -2.24204700 | 1.78959100  |
| H              | -1.42276200 | -3.61926800 | -3.67766800 | H | -2.90296000 | -2.47676500 | 1.04615700  |
| C              | -3.38334900 | 3.11967500  | -0.32699900 | C | -1.16145600 | -1.29231800 | 1.51035300  |
| H              | -3.56915500 | 3.86502400  | -1.09457300 | C | -3.42616000 | -1.31589900 | -1.42767200 |
| C              | -1.34251600 | -2.16023000 | -2.10612100 | H | -4.00706700 | -0.59425100 | -0.86111600 |
| H              | -0.28074700 | -2.29513800 | -1.92596200 | C | -1.18885400 | -2.60854200 | 3.97352300  |
| C              | -3.35729200 | -2.75240900 | -3.29653600 | H | -1.19763000 | -3.12426400 | 4.92925900  |
| H              | -3.85904300 | -3.33600500 | -4.06288600 | C | -0.18643100 | -1.01174900 | 2.47195200  |
| C              | -0.30935900 | -1.92219000 | 3.61069200  | H | 0.59401700  | -0.28772400 | 2.25106800  |
| H              | 0.43499200  | -1.75743500 | 4.38371600  | C | -2.04109800 | -1.39680000 | -1.24997700 |
| C              | 1.86468800  | -1.25069000 | -0.28373400 | C | -3.93360200 | 3.27489500  | 0.68431800  |
| O              | 1.34407700  | -2.34159900 | -0.23994500 | H | -4.57229900 | 4.13853500  | 0.84487000  |
| C              | 3.33321400  | -1.04796900 | -0.09805900 | C | -2.15791500 | -2.89857300 | 3.01654100  |
| C              | 3.84088300  | 0.21275000  | -0.43895800 | H | -2.92314600 | -3.64082900 | 3.22303600  |
| C              | 4.17479500  | -2.08033400 | 0.32493800  | C | -1.94912900 | -3.16647900 | -2.89388900 |
| C              | 5.22580600  | 0.41448600  | -0.38631500 | H | -1.37057500 | -3.88806700 | -3.46261500 |
| C              | 5.54275800  | -1.86279500 | 0.39562100  | C | -3.45593600 | 2.98639800  | -0.59353200 |
| C              | 6.06024700  | -0.61596200 | 0.02841800  | H | -3.71655500 | 3.62610200  | -1.43133200 |
| H              | 5.63575900  | 1.38396200  | -0.65572200 | C | -1.30459300 | -2.32910900 | -1.98916100 |
| H              | 6.20905900  | -2.65503700 | 0.72214500  | H | -0.23273200 | -2.40773400 | -1.83684300 |
| H              | 7.13251900  | -0.44536100 | 0.07409800  | C | -3.32777200 | -3.07876700 | -3.07150300 |
| H              | 3.73905500  | -3.04270800 | 0.57493400  | H | -3.82737900 | -3.73045400 | -3.78235200 |
| N              | 2.91646400  | 1.20484800  | -0.80690100 | C | -0.20334400 | -1.66324300 | 3.70065800  |
| H              | 2.56651800  | 2.39264200  | -0.00901900 | H | 0.56051100  | -1.44050800 | 4.43934700  |
| H              | 3.15926000  | 1.61930500  | -1.70513200 | C | 1.92616900  | -1.21922700 | -0.25360900 |
| O              | 2.13562700  | 3.30878700  | 0.39887700  | O | 1.42811200  | -2.31702400 | -0.15863000 |
| C              | 0.92948700  | 3.47411600  | -0.04471500 | C | 3.38333500  | -0.96199100 | -0.08688500 |
| C              | 0.26708600  | 4.77227600  | 0.33883000  | C | 3.84375000  | 0.30696500  | -0.47336200 |
| H              | -0.79840600 | 4.59812900  | 0.50578000  | C | 4.26363700  | -1.95512800 | 0.35343000  |
| H              | 0.73524400  | 5.20407800  | 1.22464000  | C | 5.22724100  | 0.54414000  | -0.45984200 |
| H              | 0.37059300  | 5.47918800  | -0.49145700 | C | 5.62524000  | -1.69819800 | 0.38877000  |
| O              | 0.32168500  | 2.66079400  | -0.75876000 | C | 6.09730700  | -0.44887400 | -0.03211300 |
| <b>IntA14'</b> |             |             |             | H | 5.60601000  | 1.51510000  | -0.76756400 |
| Pd             | 0.96866100  | 0.46403800  | -0.67291800 | H | 6.32128300  | -2.46047800 | 0.72408100  |
| P              | -1.14299400 | -0.34585300 | -0.05253700 | H | 7.16523900  | -0.24732400 | -0.01781900 |
| C              | -4.06523600 | -2.15409800 | -2.33703300 | H | 3.86098700  | -2.92182600 | 0.63990900  |
| H              | -5.14046400 | -2.08225200 | -2.47154600 | N | 2.88693000  | 1.25475000  | -0.83422600 |
| C              | -2.63212000 | 1.88686600  | -0.79762900 | H | 2.36554200  | 2.48237900  | 0.04986800  |
| H              | -2.24393600 | 1.68265200  | -1.79071400 | H | 3.14575400  | 1.75032800  | -1.68460900 |
| C              | -2.77377500 | 1.34069900  | 1.54724900  | O | 1.85896600  | 3.31220600  | 0.44045400  |
| H              | -2.51773400 | 0.70253000  | 2.38709300  | C | 0.68116000  | 3.41513200  | -0.11062300 |
| C              | -2.29154300 | 1.04696600  | 0.27016400  | C | -0.15105700 | 4.57560500  | 0.36144300  |
| C              | -3.58813300 | 2.45371100  | 1.75273500  | H | -0.95576600 | 4.17781900  | 0.99018900  |

H 0.44157400 5.29175700 0.93146500  
H -0.62101600 5.05872600 -0.49804800  
O 0.22886400 2.62006500 -0.94231600

**IntA19**

C 1.63161400 -2.31062800 -0.91738600  
C 0.78428800 -3.29568300 -1.40674000  
C 3.00428400 -2.52198700 -0.93837200  
C 1.23997500 -4.49533200 -1.92881900  
C 3.48893300 -3.72810200 -1.45546000  
C 2.62119100 -4.70104100 -1.95010400  
H 0.54771100 -5.24658000 -2.30025400  
H 4.56047800 -3.90992300 -1.47152200  
H 3.02170200 -5.62850400 -2.34925400  
H 3.70466300 -1.77993700 -0.56506700  
N -0.58709000 -2.85257300 -1.24205900  
H -1.15229000 -2.88126000 -2.08563200  
O -1.85839800 -3.77467600 0.98840700  
H -1.08195900 -3.31420500 -0.43355100  
C -1.32322700 -3.14813000 1.94500800  
C -1.92977700 -3.35835300 3.33266300  
H -1.16908800 -3.24087500 4.10909300  
H -2.69703900 -2.59033400 3.49337700  
H -2.40712900 -4.33804100 3.40934900  
O -0.37150900 -2.32919500 1.85539700  
Pd 0.18141800 -0.98279400 -0.42435700  
P -1.85449900 0.30463500 -0.32120900  
C -2.61752800 0.67016800 1.29648300  
C -3.23167900 -0.50207700 -1.22812100  
C -1.65972800 1.90083500 -1.20171000  
C -1.97990200 0.23209800 2.46006200  
C -3.85167700 1.32636000 1.38880400  
C -3.92630400 0.11523800 -2.27171700  
C -3.59659000 -1.79320000 -0.82462700  
C -2.10605300 3.13421700 -0.72995700  
C -1.00664300 1.84493500 -2.44055000  
H -1.07672200 -0.37233400 2.39159500  
C -2.55097300 0.49467500 3.70455500  
H -4.38130900 1.61662800 0.48498900  
C -4.41168700 1.59337700 2.63228000  
H -3.65994900 1.11761700 -2.59189600  
C -4.96878000 -0.55312700 -2.91067600  
H -3.06647500 -2.30261000 -0.02034800  
C -4.63984400 -2.45256100 -1.46610000  
C -1.92040200 4.28630800 -1.49159600

H -2.57945900 3.20919900 0.24266500  
C -0.82320200 2.99340300 -3.20000500  
H -0.64659800 0.88788000 -2.81099200  
C -3.75534000 1.18514000 3.79315600  
H -2.05524200 0.14023700 4.60338600  
H -5.36641200 2.10691500 2.69646700  
C -5.32656400 -1.83685300 -2.51074900  
H -5.50165300 -0.06484500 -3.72157000  
H -4.90929800 -3.45412500 -1.14478200  
H -2.26468600 5.24144500 -1.10639300  
C -1.28572800 4.22001400 -2.72656400  
H -0.31711500 2.93161100 -4.15887300  
H -4.19736200 1.38706700 4.76465000  
H -6.13844100 -2.35652500 -3.01148400  
H -1.14249700 5.12097900 -3.31587400  
C 3.01349900 0.84969800 -1.02344000  
P 1.71166400 0.58761100 0.24157600  
C 2.66771800 0.67262500 -2.36635100  
C 4.31577000 1.24205500 -0.70272100  
C 2.56362100 0.12206300 1.79099800  
C 1.15022000 2.29326400 0.61286000  
H 1.66975000 0.32568300 -2.61620100  
C 3.59938200 0.90367000 -3.37269200  
H 4.61331800 1.36008700 0.33368600  
C 5.25130500 1.46052600 -1.70988000  
C 2.44671300 -1.18271800 2.27766300  
C 3.31666600 1.06361100 2.50880600  
C 1.40619400 3.36611000 -0.24243700  
C 0.43102700 2.51494300 1.79238700  
C 4.89394500 1.29767200 -3.04555400  
H 3.31813900 0.75775300 -4.41120700  
H 6.26339700 1.75402900 -1.44796200  
H 1.80526200 -1.89998200 1.77619000  
C 3.10773600 -1.54530000 3.45002400  
C 3.97763300 0.69257400 3.67263600  
H 3.36889900 2.09446700 2.16892600  
H 1.95265900 3.21081300 -1.16689500  
C 0.96166300 4.64373200 0.08723500  
H 0.23341100 1.69169300 2.47102100  
C -0.02022200 3.78925200 2.11383100  
H 5.62655500 1.46644300 -3.82922300  
H 3.00196300 -2.55835300 3.82515300  
C 3.87850900 -0.61742600 4.14095500  
H 4.56050700 1.42727300 4.22019400

|   |             |             |             |
|---|-------------|-------------|-------------|
| H | 1.16606100  | 5.47065200  | -0.58597500 |
| C | 0.25120100  | 4.85891100  | 1.26373500  |
| H | -0.58020400 | 3.94310400  | 3.03130500  |
| H | 4.39003700  | -0.90608100 | 5.05473200  |
| H | -0.09484500 | 5.85704900  | 1.51621000  |

**IntA20**

|    |             |             |             |
|----|-------------|-------------|-------------|
| C  | 1.75014300  | -2.58251100 | -0.33676500 |
| C  | 0.87228800  | -3.67244400 | -0.43552600 |
| C  | 3.09720600  | -2.77380200 | -0.09922600 |
| C  | 1.32895900  | -4.98012700 | -0.27473400 |
| C  | 3.58498000  | -4.09077200 | -0.01798400 |
| C  | 2.70436900  | -5.16728800 | -0.09058200 |
| H  | 0.64482700  | -5.82602900 | -0.29503100 |
| H  | 4.65007600  | -4.26891700 | 0.10653800  |
| H  | 3.09284100  | -6.17931300 | 0.00052500  |
| H  | 3.78308800  | -1.93579800 | 0.01735100  |
| N  | -0.40618300 | -3.15175700 | -0.68823400 |
| H  | -1.14753700 | -3.61954900 | -0.17030800 |
| Pd | 0.21993000  | -1.23341700 | -0.20433700 |
| P  | -1.93660100 | -0.22240300 | -0.02183300 |
| C  | -2.35813200 | 0.57441100  | 1.57174900  |
| C  | -3.33804100 | -1.38933900 | -0.20800500 |
| C  | -2.21190600 | 1.00365000  | -1.35043800 |
| C  | -1.38772100 | 0.61320900  | 2.57569100  |
| C  | -3.63704000 | 1.07609800  | 1.84268000  |
| C  | -4.33328200 | -1.25431400 | -1.17597100 |
| C  | -3.39464100 | -2.46463500 | 0.68683800  |
| C  | -2.82185200 | 2.24666400  | -1.18511600 |
| C  | -1.76121500 | 0.62517300  | -2.62309500 |
| H  | -0.40509500 | 0.18798900  | 2.38938300  |
| C  | -1.67133200 | 1.18434100  | 3.81407400  |
| H  | -4.41842500 | 0.99934600  | 1.09112000  |
| C  | -3.91898600 | 1.65356100  | 3.07558600  |
| H  | -4.30345000 | -0.42765700 | -1.87897700 |
| C  | -5.37037100 | -2.18327500 | -1.24816200 |
| H  | -2.61720600 | -2.58037500 | 1.43882600  |
| C  | -4.43197900 | -3.38574500 | 0.61677800  |
| C  | -2.99966900 | 3.08996800  | -2.27942400 |
| H  | -3.14116400 | 2.57400400  | -0.20157300 |
| C  | -1.94741100 | 1.46578500  | -3.71403800 |
| H  | -1.26527700 | -0.33459200 | -2.75273500 |
| C  | -2.93370900 | 1.71469000  | 4.06060000  |
| H  | -0.90441300 | 1.20792400  | 4.58255100  |
| H  | -4.91204800 | 2.04574800  | 3.27370800  |

|   |             |             |             |
|---|-------------|-------------|-------------|
| C | -5.42262600 | -3.24718800 | -0.35447200 |
| H | -6.13829800 | -2.07150700 | -2.00792700 |
| H | -4.46463000 | -4.21631300 | 1.31552800  |
| H | -3.46711300 | 4.05985100  | -2.13711400 |
| C | -2.57158000 | 2.70010100  | -3.54385800 |
| H | -1.60034000 | 1.15858800  | -4.69601800 |
| H | -3.15796100 | 2.16125600  | 5.02488700  |
| H | -6.23043400 | -3.97042600 | -0.41471000 |
| H | -2.71444300 | 3.35998200  | -4.39467400 |
| C | 2.98064800  | 0.64321000  | -1.13644400 |
| P | 1.58309100  | 0.63345300  | 0.05131300  |
| C | 2.87359800  | -0.12335700 | -2.29994000 |
| C | 4.12006800  | 1.42891600  | -0.93637400 |
| C | 2.35475500  | 0.74643500  | 1.71098700  |
| C | 0.84602600  | 2.29641600  | -0.21837000 |
| H | 2.01044800  | -0.76777000 | -2.43728800 |
| C | 3.88675000  | -0.09475400 | -3.25473800 |
| H | 4.22586800  | 2.02048000  | -0.03247300 |
| C | 5.13478100  | 1.44834000  | -1.88650600 |
| C | 2.44381400  | -0.42446200 | 2.47264300  |
| C | 2.86506500  | 1.94014600  | 2.23701000  |
| C | 0.84050500  | 2.84981700  | -1.50308800 |
| C | 0.20369000  | 2.98656200  | 0.81483800  |
| C | 5.01746100  | 0.68911000  | -3.04920000 |
| H | 3.79604800  | -0.70069300 | -4.15095100 |
| H | 6.01970600  | 2.05473200  | -1.71759800 |
| H | 2.05641900  | -1.35665200 | 2.07010200  |
| C | 3.03646800  | -0.40120100 | 3.73243600  |
| C | 3.45386600  | 1.96053700  | 3.49693200  |
| H | 2.78697200  | 2.86312800  | 1.66989400  |
| H | 1.32229100  | 2.32585900  | -2.32279300 |
| C | 0.22721700  | 4.07463700  | -1.74160600 |
| H | 0.18696400  | 2.57698600  | 1.81872500  |
| C | -0.40698100 | 4.21379000  | 0.57489600  |
| H | 5.81226600  | 0.70314200  | -3.78931500 |
| H | 3.10166500  | -1.31832600 | 4.30973700  |
| C | 3.54065100  | 0.78949000  | 4.24673600  |
| H | 3.84318000  | 2.89333600  | 3.89407300  |
| H | 0.22954200  | 4.48746500  | -2.74560400 |
| C | -0.39198100 | 4.76376500  | -0.70272700 |
| H | -0.89372500 | 4.73724300  | 1.39258400  |
| H | 3.99939600  | 0.80725600  | 5.23103300  |
| H | -0.86802200 | 5.72166200  | -0.89106400 |

**TSA7**



|    |             |             |             |               |             |             |             |
|----|-------------|-------------|-------------|---------------|-------------|-------------|-------------|
| Pd | 0.35737200  | 0.98502900  | 0.30736100  | C             | -3.06821500 | 0.97806800  | -0.58676600 |
| P  | 1.63735000  | -0.86519700 | -0.17484500 | C             | 0.27858700  | -0.72601600 | -4.01182600 |
| P  | -1.82827000 | -0.08470500 | 0.23473000  | H             | 0.02357200  | 0.07406700  | -4.70015700 |
| C  | 0.46684900  | -3.06962900 | -3.49766100 | C             | -3.88610900 | -1.27260800 | 3.62333700  |
| H  | 0.34636400  | -4.11038100 | -3.78276800 | H             | -4.66957100 | -1.97739100 | 3.88569500  |
| C  | -1.87881900 | 0.53127700  | 2.94185100  | C             | -3.31426800 | -0.46528800 | 4.60417900  |
| H  | -1.09091800 | 1.23302800  | 2.67614900  | H             | -3.64981800 | -0.54122400 | 5.63426500  |
| C  | -3.45524500 | -1.18023100 | 2.30340200  | C             | -3.55749300 | 2.47113500  | -2.42736600 |
| H  | -3.90057000 | -1.81922800 | 1.54644100  | H             | -3.22501600 | 3.00691500  | -3.31094600 |
| C  | 0.82532500  | -2.05378800 | 2.18911500  | C             | 0.69959700  | -3.07625700 | 3.12628600  |
| H  | 0.36202600  | -1.08930500 | 2.37608300  | H             | 0.13766000  | -2.90097200 | 4.03858200  |
| C  | -2.66235800 | 1.65928700  | -1.73807400 | C             | 0.71763300  | -0.41074500 | -2.73039200 |
| H  | -1.63633400 | 1.57318600  | -2.08179900 | H             | 0.78024200  | 0.63384500  | -2.42943700 |
| C  | 2.16305700  | -3.49182600 | 0.79134800  | C             | -2.74398200 | -3.08261800 | -2.43849900 |
| H  | 2.77830500  | -3.64549500 | -0.09050000 | H             | -3.11989000 | -3.14423500 | -3.45528500 |
| C  | 1.53324200  | -2.25843900 | 1.00159600  | C             | -1.77037100 | -2.90185100 | 0.15598700  |
| C  | -4.37981800 | 1.12519400  | -0.12833500 | H             | -1.39583300 | -2.84910700 | 1.17223800  |
| H  | -4.70623100 | 0.61313300  | 0.77161600  | C             | 0.15731100  | -2.05734700 | -4.40015300 |
| C  | 2.03028400  | -4.51635400 | 1.72206000  | H             | -0.19247000 | -2.30522500 | -5.39805900 |
| H  | 2.51446500  | -5.47189800 | 1.54448500  | C             | 5.70425300  | -0.72748100 | 0.45844800  |
| C  | 3.90690100  | 0.08801000  | -1.50234100 | H             | 6.39936500  | -1.04166200 | 1.23127700  |
| H  | 3.21395700  | 0.42987000  | -2.26418600 | C             | -1.91489200 | -4.14653400 | -0.44709800 |
| C  | -2.60073200 | -1.83596400 | -1.83700700 | H             | -1.64312000 | -5.04150400 | 0.10492400  |
| H  | -2.87029100 | -0.94325200 | -2.39192800 | C             | -2.40463700 | -4.24105300 | -1.74673500 |
| C  | 3.44096200  | -0.62576500 | -0.39378800 | H             | -2.51955800 | -5.21257600 | -2.21858900 |
| C  | -5.27113300 | 1.94358300  | -0.81576700 | C             | 1.83577700  | 2.30169300  | 0.74469300  |
| H  | -6.28637900 | 2.06050800  | -0.44834500 | C             | 0.95755500  | 3.37605300  | 0.91506800  |
| C  | -2.11689000 | -1.73161400 | -0.52999100 | C             | 3.16216300  | 2.41103500  | 1.12002900  |
| C  | -4.86252500 | 2.61563600  | -1.96524300 | C             | 1.37381300  | 4.58401900  | 1.46576000  |
| H  | -5.55829800 | 3.26042600  | -2.49379800 | C             | 3.61040100  | 3.64114700  | 1.62837800  |
| C  | 0.91473700  | -2.75888800 | -2.21681200 | C             | 2.72541800  | 4.70222900  | 1.80636300  |
| H  | 1.11299400  | -3.56475000 | -1.52023500 | H             | 0.67626500  | 5.40405400  | 1.61866400  |
| C  | 6.16139400  | -0.02403200 | -0.65095800 | H             | 4.65834800  | 3.76435600  | 1.88983400  |
| H  | 7.21644500  | 0.21289700  | -0.74994200 | H             | 3.09078200  | 5.63993500  | 2.21796200  |
| C  | 4.34986800  | -1.02491100 | 0.58977600  | H             | 3.85989100  | 1.58399200  | 1.02699900  |
| H  | 4.00606900  | -1.55801900 | 1.47028900  | N             | -0.30521000 | 2.97639600  | 0.41114400  |
| C  | -2.31214700 | 0.43833300  | 4.26145100  | H             | -1.09109000 | 3.31499000  | 0.96324700  |
| H  | -1.86232900 | 1.07108300  | 5.02045700  | C             | -0.43946000 | 3.93932700  | -1.55578000 |
| C  | 1.05838500  | -1.42741000 | -1.82508100 | O             | -1.07253300 | 4.89475400  | -1.27681500 |
| C  | 1.28956300  | -4.31319500 | 2.88598200  | O             | 0.16968500  | 3.18965700  | -2.24072300 |
| H  | 1.18909600  | -5.11499800 | 3.61150900  |               |             |             |             |
| C  | -2.44408900 | -0.27930700 | 1.95031100  | <b>IntA21</b> |             |             |             |
| C  | 5.25855300  | 0.38311600  | -1.63059900 | Pd            | 0.23192100  | 0.97103900  | 0.39303700  |
| H  | 5.60515200  | 0.94210400  | -2.49421600 | P             | 1.64433200  | -0.74618000 | -0.15207600 |
|    |             |             |             | P             | -1.93199800 | -0.09134000 | 0.21860200  |

|   |             |             |             |               |             |             |             |
|---|-------------|-------------|-------------|---------------|-------------|-------------|-------------|
| C | -0.27354800 | -3.96549000 | -1.89088300 | C             | -4.69912900 | 0.92616300  | 3.11779700  |
| H | -0.72119400 | -4.89941000 | -1.56488400 | H             | -5.14610200 | 0.47407400  | 3.99846600  |
| C | -3.55068100 | 2.07298300  | 0.84871400  | C             | -5.05677200 | 2.21446000  | 2.73397500  |
| H | -3.10652900 | 2.53975800  | -0.03137900 | H             | -5.78264300 | 2.77425000  | 3.31671400  |
| C | -3.76859500 | 0.20564100  | 2.37153300  | C             | -2.52450100 | 0.33114300  | -3.79082200 |
| H | -3.50395900 | -0.80159000 | 2.67781400  | H             | -1.95451500 | 0.72685600  | -4.62532100 |
| C | 2.24358200  | -1.14739500 | 2.52183300  | C             | 2.71428600  | -1.84782600 | 3.62815300  |
| H | 1.84006300  | -0.14481000 | 2.64161200  | H             | 2.68009800  | -1.38738000 | 4.61076600  |
| C | -1.96226500 | 0.33393000  | -2.51637600 | C             | 0.86282100  | -1.56034700 | -2.69514200 |
| H | -0.97435800 | 0.76123100  | -2.36606500 | H             | 1.30248200  | -0.62298700 | -3.02171600 |
| C | 2.80584000  | -3.01529400 | 1.10015300  | C             | -2.48785100 | -4.13785800 | 0.94049700  |
| H | 2.83878800  | -3.48012900 | 0.11918700  | H             | -3.02111900 | -4.97702700 | 0.50331400  |
| C | 2.28071700  | -1.72672500 | 1.24906500  | C             | -1.11766600 | -1.98973700 | 2.03897500  |
| C | -4.01193600 | -0.58961900 | -1.62356100 | H             | -0.56944100 | -1.15292100 | 2.46371700  |
| H | -4.61137700 | -0.90007600 | -0.77142900 | C             | -0.33189900 | -3.58588900 | -3.22701500 |
| C | 3.27025500  | -3.71623300 | 2.20864900  | H             | -0.82133500 | -4.22528000 | -3.95551700 |
| H | 3.66913700  | -4.71824000 | 2.08321600  | C             | 5.41111700  | -0.28687700 | -1.75682900 |
| C | 2.96252900  | 1.05377100  | -1.81765200 | H             | 6.36572700  | -0.80343300 | -1.72129000 |
| H | 2.02590800  | 1.61234400  | -1.81957100 | C             | -0.99145200 | -3.25143700 | 2.60891100  |
| C | -2.60501700 | -2.87488300 | 0.36465700  | H             | -0.34310700 | -3.38985800 | 3.46890900  |
| H | -3.20264900 | -2.75070000 | -0.53176900 | C             | -1.67817900 | -4.33123600 | 2.05668000  |
| C | 3.10649700  | -0.11096500 | -1.05294600 | H             | -1.57905100 | -5.32082900 | 2.49289800  |
| C | -4.56371800 | -0.60134100 | -2.89774300 | C             | 1.74141800  | 2.22389800  | 0.86928200  |
| H | -5.58338700 | -0.94550700 | -3.04299100 | C             | 0.99434300  | 3.38959700  | 0.80466300  |
| C | -1.91859200 | -1.78835300 | 0.90806300  | C             | 3.06529800  | 2.27497100  | 1.28326500  |
| C | -3.81467300 | -0.14814200 | -3.98429800 | C             | 1.51006700  | 4.63339500  | 1.13246300  |
| H | -4.25186600 | -0.14619400 | -4.97860900 | C             | 3.60927800  | 3.51936700  | 1.61750100  |
| C | 0.34151800  | -3.14230900 | -0.95152300 | C             | 2.84293700  | 4.68302500  | 1.54491100  |
| H | 0.35080700  | -3.44513200 | 0.09050000  | H             | 0.90007300  | 5.53060900  | 1.06866100  |
| C | 5.26406000  | 0.86352500  | -2.52746800 | H             | 4.64714900  | 3.58190800  | 1.93399000  |
| H | 6.10614500  | 1.24614700  | -3.09692200 | H             | 3.28855200  | 5.63770000  | 1.80909500  |
| C | 4.33423800  | -0.77741500 | -1.02464300 | H             | 3.68321900  | 1.38214500  | 1.33793400  |
| H | 4.46375600  | -1.67025300 | -0.42086900 | N             | -0.35159300 | 3.07847100  | 0.36316100  |
| C | -4.48226600 | 2.78297100  | 1.59842800  | H             | -1.08860400 | 3.48750100  | 0.93079000  |
| H | -4.75717800 | 3.78678300  | 1.28859700  | C             | -0.68924200 | 3.26366400  | -1.12743800 |
| C | 0.92235600  | -1.93480800 | -1.34686600 | O             | -1.83146400 | 3.69011400  | -1.29913100 |
| C | 3.22247600  | -3.13510400 | 3.47362400  | O             | 0.21197800  | 2.88644300  | -1.88868900 |
| H | 3.58340600  | -3.68497300 | 4.33774100  |               |             |             |             |
| C | -3.18826600 | 0.77552000  | 1.23609200  | <b>IntA22</b> |             |             |             |
| C | 4.04114600  | 1.52804600  | -2.55811600 | Pd            | 0.38587400  | 0.96630000  | 0.44405800  |
| H | 3.92174000  | 2.43332000  | -3.14491300 | P             | 1.46641800  | -0.97087500 | -0.15589800 |
| C | -2.69522000 | -0.14997200 | -1.43104400 | P             | -1.93966700 | 0.17720000  | 0.18578500  |
| C | 0.23581000  | -2.37853100 | -3.62627200 | C             | -0.04756500 | -3.23942100 | -3.29066000 |
| H | 0.18828400  | -2.06836700 | -4.66535700 | H             | -0.24961800 | -4.28199700 | -3.51638000 |
|   |             |             |             | C             | -2.53004200 | 1.48259000  | 2.56144100  |

|   |             |             |             |
|---|-------------|-------------|-------------|
| H | -1.78003400 | 2.19227000  | 2.22072800  |
| C | -3.84841100 | -0.51046500 | 2.19102400  |
| H | -4.11092100 | -1.37158600 | 1.58427800  |
| C | 0.79934600  | -1.96817500 | 2.33143000  |
| H | 0.43497300  | -0.95729900 | 2.50181200  |
| C | -2.20442800 | 2.01766800  | -1.89639000 |
| H | -1.12134200 | 2.06754000  | -1.87124500 |
| C | 1.85186000  | -3.59390500 | 0.89451900  |
| H | 2.35016900  | -3.85338600 | -0.03463000 |
| C | 1.36643500  | -2.29508100 | 1.09510100  |
| C | -4.28536200 | 1.17982900  | -1.00758700 |
| H | -4.82564500 | 0.56050800  | -0.29672100 |
| C | 1.72543000  | -4.55475000 | 1.89179000  |
| H | 2.09824100  | -5.56009300 | 1.72118200  |
| C | 3.62275200  | 0.12674800  | -1.51393600 |
| H | 2.86440100  | 0.70891500  | -2.02779900 |
| C | -2.85374800 | -1.83858200 | -1.58464200 |
| H | -3.09190900 | -1.03798100 | -2.27691300 |
| C | 3.25202900  | -0.81928000 | -0.55142700 |
| C | -4.98750100 | 1.95559500  | -1.92137900 |
| H | -6.07330100 | 1.93693700  | -1.92399400 |
| C | -2.32125100 | -1.54264200 | -0.32811500 |
| C | -4.29840400 | 2.76781100  | -2.82163500 |
| H | -4.84897000 | 3.38585700  | -3.52482600 |
| C | 0.48039500  | -2.90020400 | -2.04821300 |
| H | 0.65200300  | -3.68402300 | -1.32106300 |
| C | 5.95145500  | -0.32720700 | -1.09273000 |
| H | 6.99945900  | -0.12894900 | -1.29622700 |
| C | 4.24735800  | -1.50719300 | 0.14237000  |
| H | 3.98838600  | -2.21648700 | 0.92073000  |
| C | -3.20128800 | 1.69364500  | 3.76209100  |
| H | -2.95081000 | 2.55976700  | 4.36714800  |
| C | 0.73209500  | -1.56512200 | -1.73127300 |
| C | 1.13324800  | -4.22490800 | 3.10961500  |
| H | 1.03714300  | -4.97647700 | 3.88743800  |
| C | -2.84774500 | 0.37131800  | 1.76897900  |
| C | 4.96151300  | 0.36954400  | -1.78364600 |
| H | 5.23311100  | 1.11815700  | -2.52108000 |
| C | -2.88592400 | 1.20071200  | -0.99426300 |
| C | -0.11579500 | -0.91575000 | -3.90993100 |
| H | -0.36303900 | -0.13327800 | -4.62071000 |
| C | -4.51252700 | -0.29406900 | 3.39528400  |
| H | -5.28649300 | -0.98625400 | 3.71420500  |
| C | -4.18767900 | 0.80583000  | 4.18417800  |

|   |             |             |             |
|---|-------------|-------------|-------------|
| H | -4.70627600 | 0.97337100  | 5.12381200  |
| C | -2.90872800 | 2.80119300  | -2.80603200 |
| H | -2.36674200 | 3.45570100  | -3.48063700 |
| C | 0.68205200  | -2.92771400 | 3.33339500  |
| H | 0.23477100  | -2.65880500 | 4.28519200  |
| C | 0.41285300  | -0.57550100 | -2.67049500 |
| H | 0.56028900  | 0.47235100  | -2.42185600 |
| C | -3.07709400 | -3.16065300 | -1.96118300 |
| H | -3.49048900 | -3.37298100 | -2.94263600 |
| C | -2.00795900 | -2.59852400 | 0.53697500  |
| H | -1.60458600 | -2.39144400 | 1.52244900  |
| C | -0.33885100 | -2.25283800 | -4.22653000 |
| H | -0.75572100 | -2.52276200 | -5.19222000 |
| C | 5.59186100  | -1.26411700 | -0.13225200 |
| H | 6.35652200  | -1.80262100 | 0.41956700  |
| C | -2.22584100 | -3.91778100 | 0.15828700  |
| H | -1.97455000 | -4.72014000 | 0.84576200  |
| C | -2.76507600 | -4.20261900 | -1.09430800 |
| H | -2.94031900 | -5.23230800 | -1.39242300 |
| C | 2.14471400  | 1.88039200  | 0.79043800  |
| C | 2.32217000  | 3.12694500  | 0.17307900  |
| C | 3.15689100  | 1.38486000  | 1.60838000  |
| C | 3.55122600  | 3.78624400  | 0.29234700  |
| C | 4.37473600  | 2.05020400  | 1.74346600  |
| C | 4.57690000  | 3.24242700  | 1.05751000  |
| H | 3.69376500  | 4.74382900  | -0.20458500 |
| H | 5.16025500  | 1.62770500  | 2.36304400  |
| H | 5.52504300  | 3.76721100  | 1.13414400  |
| H | 3.02044500  | 0.43529500  | 2.12129400  |
| N | 1.29137100  | 3.71535200  | -0.58012400 |
| H | 1.53992100  | 4.57997600  | -1.04153100 |
| C | -0.05237500 | 3.79148600  | -0.12351900 |
| O | -0.74204800 | 4.71308100  | -0.53355800 |
| O | -0.44564200 | 2.85193100  | 0.67996900  |

### IntA25

|    |             |             |             |
|----|-------------|-------------|-------------|
| Pd | -0.12214900 | -0.97492700 | -0.68833400 |
| P  | 2.13294000  | -0.21146600 | -0.08170600 |
| P  | -1.43715400 | 0.93625900  | 0.00440900  |
| C  | 1.82833200  | 2.36845400  | 3.09377400  |
| H  | 1.62785200  | 3.42614200  | 3.23643600  |
| C  | -4.14785300 | 0.38779100  | -0.39567900 |
| H  | -4.06363200 | -0.22029900 | 0.49906400  |
| C  | -3.16845900 | 1.87977900  | -2.01700800 |
| H  | -2.32804100 | 2.46088100  | -2.38377600 |

|   |             |             |             |
|---|-------------|-------------|-------------|
| C | 2.70052300  | 0.87609200  | -2.56372600 |
| H | 1.98260300  | 0.14089400  | -2.91811000 |
| C | -1.15466800 | 0.22483500  | 2.67568900  |
| H | -0.36007300 | -0.42143400 | 2.32257400  |
| C | 3.88284000  | 1.93741500  | -0.75361100 |
| H | 4.11419500  | 2.02247900  | 0.30334900  |
| C | 2.96024900  | 0.98431200  | -1.19345700 |
| C | -2.92777200 | 1.80669600  | 2.24075100  |
| H | -3.51499000 | 2.39850900  | 1.54408200  |
| C | 4.51105100  | 2.78232100  | -1.66478100 |
| H | 5.21934700  | 3.52415000  | -1.30841700 |
| C | 2.87992400  | -2.87104700 | 0.37180500  |
| H | 1.85011900  | -2.99933100 | 0.70314300  |
| C | -0.65287600 | 3.61608500  | 0.57154700  |
| H | -1.21020600 | 3.53230100  | 1.49823500  |
| C | 3.32237200  | -1.61244200 | -0.05649200 |
| C | -3.22580900 | 1.84223400  | 3.59703700  |
| H | -4.03681400 | 2.47035500  | 3.95390900  |
| C | -0.60138000 | 2.53809800  | -0.31748600 |
| C | -2.49709500 | 1.05951800  | 4.49400000  |
| H | -2.74622000 | 1.07523800  | 5.55120900  |
| C | 1.94128800  | 1.86283500  | 1.80338200  |
| H | 1.82988100  | 2.53486700  | 0.95906600  |
| C | 5.08892900  | -3.77884600 | -0.00001000 |
| H | 5.77490800  | -4.62076600 | 0.01931200  |
| C | 4.65365400  | -1.44997000 | -0.45675600 |
| H | 5.01259000  | -0.48519000 | -0.79966500 |
| C | -5.34694200 | 0.41494900  | -1.09574700 |
| H | -6.18775500 | -0.17029900 | -0.73700800 |
| C | 2.19060100  | 0.50134200  | 1.59806000  |
| C | 4.24091900  | 2.67098900  | -3.02578800 |
| H | 4.73537200  | 3.32822400  | -3.73492000 |
| C | -3.04619000 | 1.11873900  | -0.85318000 |
| C | 3.76716500  | -3.94400500 | 0.40242400  |
| H | 3.41554400  | -4.91347700 | 0.74218800  |
| C | -1.88350500 | 0.99568200  | 1.77187100  |
| C | 2.20336900  | 0.16502200  | 3.99093800  |
| H | 2.29290200  | -0.50555300 | 4.83985900  |
| C | -4.37300800 | 1.90634000  | -2.71536200 |
| H | -4.45669400 | 2.50473300  | -3.61785400 |
| C | -5.46271900 | 1.17244800  | -2.25867500 |
| H | -6.39965700 | 1.18896600  | -2.80760500 |
| C | -1.46732100 | 0.24925400  | 4.03218700  |
| H | -0.91166400 | -0.39045400 | 4.70892900  |

|   |             |             |             |
|---|-------------|-------------|-------------|
| C | 3.33874100  | 1.70921500  | -3.47580000 |
| H | 3.12767100  | 1.61082100  | -4.53638400 |
| C | 2.31570400  | -0.34765000 | 2.70248100  |
| H | 2.46622400  | -1.41212400 | 2.56268200  |
| C | 0.04512600  | 4.78717400  | 0.29336200  |
| H | 0.00709000  | 5.61394300  | 0.99664100  |
| C | 0.14750700  | 2.66261600  | -1.49013000 |
| H | 0.20558800  | 1.82245000  | -2.17604300 |
| C | 1.95882900  | 1.52106700  | 4.19012900  |
| H | 1.86062200  | 1.91451700  | 5.19742400  |
| C | 5.53006700  | -2.52989000 | -0.42934100 |
| H | 6.55970700  | -2.39314000 | -0.74658800 |
| C | 0.84504500  | 3.83368200  | -1.76996000 |
| H | 1.44469600  | 3.89842300  | -2.67244200 |
| C | 0.80008000  | 4.89649900  | -0.87302300 |
| H | 1.35540800  | 5.80672900  | -1.07893800 |
| C | -1.92749000 | -1.83079400 | -1.10011600 |
| C | -2.61742000 | -2.55894000 | -0.11291200 |
| C | -2.47073600 | -1.70116600 | -2.37774700 |
| C | -3.85093900 | -3.13553600 | -0.47833700 |
| C | -3.69501500 | -2.26802100 | -2.71651700 |
| C | -4.38438800 | -2.99197100 | -1.74942500 |
| H | -4.39623700 | -3.70657300 | 0.27037200  |
| H | -4.10203700 | -2.13694300 | -3.71410600 |
| H | -5.34132800 | -3.45092200 | -1.98165800 |
| H | -1.94116600 | -1.11014800 | -3.11999400 |
| N | -2.24520400 | -2.67877400 | 1.22292000  |
| H | -2.93814100 | -3.10778500 | 1.81903700  |
| C | -0.97035000 | -2.72764600 | 1.86064500  |
| O | -0.97820700 | -3.11032100 | 3.02841100  |
| O | 0.03775900  | -2.33889300 | 1.18073600  |
| C | 0.56633900  | -2.21634800 | -2.07792000 |
| O | 0.92426100  | -2.96919600 | -2.85392100 |

**TSA9**

|    |             |             |             |
|----|-------------|-------------|-------------|
| Pd | -0.16128600 | -0.83918600 | -0.80197800 |
| P  | 2.10611300  | -0.12943700 | -0.18805800 |
| P  | -1.43102000 | 0.94315300  | 0.14362800  |
| C  | 1.86238100  | 2.33494000  | 3.10465800  |
| H  | 1.69221900  | 3.39007100  | 3.29797500  |
| C  | -4.16430000 | 0.39753600  | -0.08813500 |
| H  | -4.00702100 | -0.28796600 | 0.73764500  |
| C  | -3.32092500 | 2.02999600  | -1.64903700 |
| H  | -2.51391700 | 2.64678300  | -2.03195200 |
| C  | 2.44464200  | 1.06701600  | -2.65234900 |

|   |             |             |             |
|---|-------------|-------------|-------------|
| H | 1.73845300  | 0.30612900  | -2.97760700 |
| C | -1.07319000 | -0.27248300 | 2.61115200  |
| H | -0.37785500 | -0.93130200 | 2.10670600  |
| C | 3.72000900  | 2.11770200  | -0.89771000 |
| H | 4.03081300  | 2.17448800  | 0.14081700  |
| C | 2.80817000  | 1.13916200  | -1.30313200 |
| C | -2.68710100 | 1.52479200  | 2.60295900  |
| H | -3.25619400 | 2.27939200  | 2.06650700  |
| C | 4.23550200  | 3.02399800  | -1.82022200 |
| H | 4.93734500  | 3.78445400  | -1.49141500 |
| C | 3.04852900  | -2.73909600 | 0.18545800  |
| H | 2.01546600  | -3.01423900 | 0.40012800  |
| C | -0.69215800 | 3.59111400  | 0.90580500  |
| H | -1.17347900 | 3.40927200  | 1.86027100  |
| C | 3.39586000  | -1.43581300 | -0.18570800 |
| C | -2.91488000 | 1.32396100  | 3.95794700  |
| H | -3.64135400 | 1.94013900  | 4.47940400  |
| C | -0.66469100 | 2.59255400  | -0.07157900 |
| C | -2.22802700 | 0.31805800  | 4.64114600  |
| H | -2.42157400 | 0.15392600  | 5.69737400  |
| C | 1.96106400  | 1.89003900  | 1.78975800  |
| H | 1.86644300  | 2.60607400  | 0.98076400  |
| C | 5.35547300  | -3.42341600 | -0.04403200 |
| H | 6.11688400  | -4.19640200 | 0.00751700  |
| C | 4.72994500  | -1.13668300 | -0.48955600 |
| H | 5.01687000  | -0.13427900 | -0.78956200 |
| C | -5.41775500 | 0.47866800  | -0.68080000 |
| H | -6.22678400 | -0.14017400 | -0.30591600 |
| C | 2.17236200  | 0.53547800  | 1.51685300  |
| C | 3.86027800  | 2.95093400  | -3.15902600 |
| H | 4.26668500  | 3.65664100  | -3.87748700 |
| C | -3.10419500 | 1.17189200  | -0.56920400 |
| C | 4.03200600  | -3.72371000 | 0.25771100  |
| H | 3.74590200  | -4.73076100 | 0.54434000  |
| C | -1.74754200 | 0.73428300  | 1.92315300  |
| C | 2.18250600  | 0.08353200  | 3.89263400  |
| H | 2.25678900  | -0.63020100 | 4.70710000  |
| C | -4.57873300 | 2.10914800  | -2.24072400 |
| H | -4.73591900 | 2.78207000  | -3.07846900 |
| C | -5.62830200 | 1.33331300  | -1.75964600 |
| H | -6.60765100 | 1.39257200  | -2.22510700 |
| C | -1.31714700 | -0.48442400 | 3.96580000  |
| H | -0.79997000 | -1.29795000 | 4.46323200  |
| C | 2.96860900  | 1.96486400  | -3.57625700 |

|   |             |             |             |
|---|-------------|-------------|-------------|
| H | 2.67912100  | 1.89539000  | -4.62042100 |
| C | 2.27794800  | -0.36790100 | 2.58116800  |
| H | 2.39605800  | -1.43083000 | 2.39405900  |
| C | -0.05611500 | 4.80766500  | 0.68055500  |
| H | -0.07348800 | 5.57263300  | 1.45126000  |
| C | -0.00280800 | 2.84020300  | -1.27690200 |
| H | 0.03758400  | 2.06453100  | -2.03608600 |
| C | 1.97317700  | 1.43410300  | 4.15874000  |
| H | 1.88873000  | 1.78106700  | 5.18417500  |
| C | 5.70223200  | -2.12755000 | -0.42105600 |
| H | 6.73260500  | -1.88597100 | -0.66510000 |
| C | 0.63504000  | 4.05602000  | -1.50276100 |
| H | 1.16796600  | 4.21692700  | -2.43447700 |
| C | 0.61354800  | 5.04041600  | -0.51942600 |
| H | 1.12087400  | 5.98617400  | -0.68476400 |
| C | -1.96689500 | -1.70948700 | -1.25447500 |
| C | -2.52553000 | -2.57937000 | -0.30331000 |
| C | -2.64186200 | -1.44844200 | -2.44311900 |
| C | -3.79855800 | -3.11035900 | -0.54874300 |
| C | -3.90488500 | -1.98723900 | -2.67879100 |
| C | -4.48726500 | -2.80853800 | -1.71767100 |
| H | -4.23510800 | -3.77933600 | 0.18901500  |
| H | -4.43141100 | -1.75688500 | -3.60010300 |
| H | -5.47341500 | -3.23253000 | -1.88501500 |
| H | -2.19922700 | -0.78369000 | -3.18047600 |
| N | -1.88418100 | -2.84796500 | 0.91375100  |
| H | -2.44394700 | -2.87307100 | 1.75209100  |
| C | -0.54198000 | -3.26227500 | 1.10697500  |
| O | -0.12685700 | -3.26168000 | 2.27322700  |
| O | 0.10991500  | -3.59097100 | 0.05709300  |
| C | 0.40433500  | -2.51399300 | -1.72476400 |
| O | 0.75205600  | -3.29288100 | -2.48547700 |

### IntA26

|    |             |             |             |
|----|-------------|-------------|-------------|
| Pd | -0.18958500 | -0.99342100 | -0.28751500 |
| P  | 2.05867600  | -0.07819800 | -0.11950700 |
| P  | -1.52022600 | 0.97924000  | 0.14357600  |
| C  | 1.94582600  | 3.60828600  | 1.69990500  |
| H  | 1.55785600  | 4.59227400  | 1.45374900  |
| C  | -4.05861500 | -0.04586800 | 0.60453800  |
| H  | -3.59200400 | -0.52553100 | 1.46030400  |
| C  | -3.91101700 | 1.40030600  | -1.31961200 |
| H  | -3.34100100 | 2.06183000  | -1.96483600 |
| C  | 2.10371900  | -0.19493200 | -2.88098100 |
| H  | 1.53434300  | -1.11047000 | -2.73234500 |

|   |             |             |             |
|---|-------------|-------------|-------------|
| C | -0.55280200 | 1.02076400  | 2.75148300  |
| H | 0.15534000  | 0.28189700  | 2.39095500  |
| C | 3.32509300  | 1.68325200  | -1.97651700 |
| H | 3.69026900  | 2.25351800  | -1.12830900 |
| C | 2.54512500  | 0.54188400  | -1.77365800 |
| C | -2.45681700 | 2.45386500  | 2.37219700  |
| H | -3.24308700 | 2.82359600  | 1.71924300  |
| C | 3.63242500  | 2.10335100  | -3.26816200 |
| H | 4.23349500  | 2.99605100  | -3.41397000 |
| C | 3.10713700  | -2.24852500 | 1.27048000  |
| H | 2.12022100  | -2.34094200 | 1.71346800  |
| C | -1.10002700 | 3.74711900  | -0.45466800 |
| H | -1.51305800 | 3.98883000  | 0.51916600  |
| C | 3.37939200  | -1.26615400 | 0.31508600  |
| C | -2.40260900 | 2.87437900  | 3.69599000  |
| H | -3.13432400 | 3.58597400  | 4.06684800  |
| C | -1.01343400 | 2.41600200  | -0.87189700 |
| C | -1.41785500 | 2.37473400  | 4.54750500  |
| H | -1.37792900 | 2.70386600  | 5.58174900  |
| C | 1.87689800  | 2.59309400  | 0.75281500  |
| H | 1.44682100  | 2.80598800  | -0.21894900 |
| C | 5.36826200  | -3.06595600 | 1.08940700  |
| H | 6.14036800  | -3.77153600 | 1.38218100  |
| C | 4.65553100  | -1.18981500 | -0.25093500 |
| H | 4.87654000  | -0.43767600 | -1.00217500 |
| C | -5.39017600 | -0.30402500 | 0.31285000  |
| H | -5.95809200 | -0.98051200 | 0.94377800  |
| C | 2.35814800  | 1.31161400  | 1.04356700  |
| C | 3.17359800  | 1.38084900  | -4.36596500 |
| H | 3.41390600  | 1.70970600  | -5.37298400 |
| C | -3.30677700 | 0.80690200  | -0.21187000 |
| C | 4.10053000  | -3.14301700 | 1.65748600  |
| H | 3.86557900  | -3.90867900 | 2.38988900  |
| C | -1.51609100 | 1.53818600  | 1.88310800  |
| C | 2.99774500  | 2.09396400  | 3.24473700  |
| H | 3.44318400  | 1.89324000  | 4.21472000  |
| C | -5.24957200 | 1.14092600  | -1.60985300 |
| H | -5.71098000 | 1.60700700  | -2.47548900 |
| C | -5.98856200 | 0.28772700  | -0.79872700 |
| H | -7.02854300 | 0.07930100  | -1.03171900 |
| C | -0.49883200 | 1.44292700  | 4.07689000  |
| H | 0.26224900  | 1.03863600  | 4.73651100  |
| C | 2.41761500  | 0.22662000  | -4.16912900 |
| H | 2.07316100  | -0.35324100 | -5.02008900 |

|   |             |             |             |
|---|-------------|-------------|-------------|
| C | 2.92945900  | 1.07525800  | 2.29810000  |
| H | 3.31838900  | 0.09190900  | 2.54331000  |
| C | -0.61069300 | 4.76676300  | -1.26531800 |
| H | -0.66946700 | 5.79737100  | -0.92758900 |
| C | -0.45089600 | 2.12787900  | -2.11973400 |
| H | -0.35987900 | 1.09454400  | -2.44338500 |
| C | 2.49933300  | 3.36018600  | 2.95267200  |
| H | 2.54586500  | 4.15033100  | 3.69603000  |
| C | 5.64380300  | -2.08911000 | 0.13467700  |
| H | 6.62987900  | -2.03020400 | -0.31657300 |
| C | 0.03846400  | 3.14723400  | -2.93082300 |
| H | 0.50194100  | 2.89918000  | -3.88051100 |
| C | -0.03480300 | 4.46861800  | -2.49957700 |
| H | 0.36058000  | 5.26661600  | -3.12097700 |
| C | -1.88176900 | -2.08769900 | -0.69912400 |
| C | -2.34947900 | -3.04528900 | 0.20302400  |
| C | -2.63766200 | -1.86850700 | -1.85496100 |
| C | -3.56304200 | -3.70619900 | 0.00715700  |
| C | -3.85044300 | -2.51838400 | -2.06308000 |
| C | -4.32482600 | -3.42865200 | -1.12081700 |
| H | -3.89387300 | -4.44385900 | 0.73388500  |
| H | -4.43180200 | -2.30540200 | -2.95566300 |
| H | -5.27278600 | -3.93582100 | -1.27397200 |
| H | -2.29617500 | -1.14432100 | -2.59063600 |
| N | -1.59738400 | -3.34045800 | 1.37743200  |
| H | -2.03024800 | -3.19785200 | 2.27877300  |
| C | -0.25198200 | -3.52971700 | 1.45273500  |
| O | 0.36105700  | -3.53765200 | 2.50044500  |
| O | 0.36555000  | -3.81967500 | 0.26637900  |
| C | 0.53805900  | -2.83184400 | -0.71409800 |
| O | 1.09899700  | -3.17325300 | -1.71847100 |

**TSA10**

|    |             |             |             |
|----|-------------|-------------|-------------|
| Pd | -0.14556900 | -0.95205000 | -0.16393200 |
| P  | 2.08846700  | -0.06037300 | -0.08232400 |
| P  | -1.56893200 | 0.99360800  | 0.14033500  |
| C  | 1.91981600  | 3.73599000  | 1.48550800  |
| H  | 1.52138100  | 4.69585200  | 1.17054100  |
| C  | -4.06715500 | -0.14681400 | 0.54068500  |
| H  | -3.61554400 | -0.54965500 | 1.44344300  |
| C  | -3.90472300 | 1.17690400  | -1.46723400 |
| H  | -3.33763600 | 1.82307200  | -2.13052600 |
| C  | 2.13139300  | -0.28729600 | -2.84272200 |
| H  | 1.52071200  | -1.17016800 | -2.66419500 |
| C  | -0.67314300 | 1.49627100  | 2.71933800  |

|   |             |             |             |
|---|-------------|-------------|-------------|
| H | 0.14926600  | 0.84424700  | 2.44315500  |
| C | 3.40571300  | 1.58620300  | -2.00861100 |
| H | 3.78173100  | 2.18082500  | -1.18187200 |
| C | 2.59369300  | 0.47557900  | -1.76236700 |
| C | -2.76544200 | 2.56952300  | 2.17762900  |
| H | -3.58082900 | 2.74831800  | 1.48176800  |
| C | 3.72866500  | 1.94675400  | -3.31426600 |
| H | 4.35434600  | 2.81639200  | -3.49260400 |
| C | 3.11253100  | -2.16643800 | 1.40700100  |
| H | 2.10929500  | -2.24858200 | 1.81059800  |
| C | -1.18098900 | 3.71877700  | -0.63850200 |
| H | -1.63319800 | 4.01519800  | 0.30271900  |
| C | 3.41434200  | -1.20843000 | 0.43652200  |
| C | -2.79374200 | 3.14858900  | 3.44159200  |
| H | -3.62690100 | 3.78491100  | 3.72526800  |
| C | -1.07201000 | 2.36554100  | -0.96919000 |
| C | -1.75760900 | 2.90885000  | 4.34342200  |
| H | -1.78193100 | 3.36255800  | 5.32997800  |
| C | 1.87247600  | 2.65888000  | 0.60838000  |
| H | 1.44705700  | 2.79936800  | -0.37925200 |
| C | 5.38132400  | -2.97379700 | 1.33907700  |
| H | 6.14550100  | -3.66590900 | 1.68091900  |
| C | 4.71202000  | -1.13973800 | -0.08070400 |
| H | 4.95770800  | -0.40725900 | -0.84391500 |
| C | -5.37928300 | -0.47126700 | 0.22367300  |
| H | -5.94609400 | -1.12341900 | 0.88117200  |
| C | 2.36753300  | 1.40585200  | 0.98927400  |
| C | 3.25363000  | 1.19443200  | -4.38492200 |
| H | 3.50637400  | 1.47627700  | -5.40309000 |
| C | -3.31996100 | 0.68680000  | -0.29876000 |
| C | 4.09279400  | -3.04482000 | 1.85875700  |
| H | 3.82990900  | -3.79294500 | 2.59958900  |
| C | -1.69611500 | 1.74666600  | 1.80188900  |
| C | 2.96899900  | 2.34104600  | 3.14152300  |
| H | 3.40477700  | 2.21127700  | 4.12798500  |
| C | -5.21901900 | 0.84270700  | -1.78811900 |
| H | -5.66414900 | 1.23066100  | -2.69975000 |
| C | -5.95860400 | 0.02139500  | -0.94414800 |
| H | -6.98275600 | -0.23819000 | -1.19556100 |
| C | -0.69956100 | 2.08088500  | 3.98242800  |
| H | 0.10959600  | 1.88531300  | 4.67902900  |
| C | 2.46208300  | 0.07273200  | -4.14554500 |
| H | 2.10058400  | -0.52830400 | -4.97455900 |
| C | 2.92478000  | 1.26038900  | 2.26364400  |

|   |             |             |             |
|---|-------------|-------------|-------------|
| H | 3.32238200  | 0.29965800  | 2.57671500  |
| C | -0.66881200 | 4.69127900  | -1.49306800 |
| H | -0.74611300 | 5.74015200  | -1.22149700 |
| C | -0.46324800 | 2.00730500  | -2.17711600 |
| H | -0.35162000 | 0.95662000  | -2.43139200 |
| C | 2.46168700  | 3.57927000  | 2.75845800  |
| H | 2.49049600  | 4.41822900  | 3.44730400  |
| C | 5.68920300  | -2.02092500 | 0.36917300  |
| H | 6.69255200  | -1.96766200 | -0.04322400 |
| C | 0.04973400  | 2.97809900  | -3.03128000 |
| H | 0.55035000  | 2.67586800  | -3.94598900 |
| C | -0.04619200 | 4.32336200  | -2.68457300 |
| H | 0.36847600  | 5.08486500  | -3.33846700 |
| C | -1.62494400 | -2.39619000 | -0.62987200 |
| C | -2.21469700 | -3.16627900 | 0.37485500  |
| C | -2.32901600 | -2.22145200 | -1.82792500 |
| C | -3.50642200 | -3.67757300 | 0.23240700  |
| C | -3.61978000 | -2.70896600 | -1.97478600 |
| C | -4.21359100 | -3.42708900 | -0.93511100 |
| H | -3.94000200 | -4.28142100 | 1.02564000  |
| H | -4.16795000 | -2.52847300 | -2.89414200 |
| H | -5.22203600 | -3.81395900 | -1.04650600 |
| H | -1.85724400 | -1.68243200 | -2.64471600 |
| N | -1.46363100 | -3.44703400 | 1.53058100  |
| H | -1.92250500 | -3.54288000 | 2.42382500  |
| C | -0.11237300 | -3.66342600 | 1.57032200  |
| O | 0.49268200  | -3.85044100 | 2.60322800  |
| O | 0.51217300  | -3.74697800 | 0.36893700  |
| C | 0.27923400  | -2.85875500 | -0.70826200 |
| O | 0.73905300  | -3.18112400 | -1.77373900 |

### IntA27

|    |             |             |             |
|----|-------------|-------------|-------------|
| Pd | 0.06655500  | -0.31511000 | -0.87134900 |
| P  | 2.32483400  | -0.16156400 | -0.37696400 |
| P  | -1.63009100 | 1.05610700  | -0.15245900 |
| C  | 1.96898100  | 2.04585500  | 3.08857900  |
| H  | 1.76581800  | 3.08079200  | 3.34751200  |
| C  | -3.63004600 | 0.55491800  | -1.99809600 |
| H  | -3.03323200 | -0.32906500 | -2.20696100 |
| C  | -3.93867400 | 2.61652400  | -0.78611800 |
| H  | -3.59258400 | 3.33969400  | -0.05231800 |
| C  | 2.64577500  | 1.53144800  | -2.55682400 |
| H  | 1.84488600  | 0.92541700  | -2.97464100 |
| C  | -1.24015600 | 0.26540300  | 2.47981200  |
| H  | -0.18824700 | 0.34973900  | 2.22539500  |

|   |             |             |             |
|---|-------------|-------------|-------------|
| C | 4.12501600  | 2.04460800  | -0.73041900 |
| H | 4.49005600  | 1.85598500  | 0.27478500  |
| C | 3.11109700  | 1.24587800  | -1.26944400 |
| C | -3.56425700 | 0.43997600  | 1.86677100  |
| H | -4.33701600 | 0.68438300  | 1.14423800  |
| C | 4.65132600  | 3.10808700  | -1.45706600 |
| H | 5.43162700  | 3.72472200  | -1.02034400 |
| C | 3.28985400  | -2.67496200 | -1.06337700 |
| H | 2.29844700  | -2.82170600 | -1.48096100 |
| C | -1.03587800 | 3.45258800  | 1.30150100  |
| H | -1.69604900 | 3.09219400  | 2.08500300  |
| C | 3.61073100  | -1.47164300 | -0.43349000 |
| C | -3.92649500 | -0.04435400 | 3.12469600  |
| H | -4.97790200 | -0.16328600 | 3.37215400  |
| C | -0.86353800 | 2.70667700  | 0.13352400  |
| C | -2.94771300 | -0.36977800 | 4.06115400  |
| H | -3.23232500 | -0.74971300 | 5.03807300  |
| C | 2.11207800  | 1.69534300  | 1.74990200  |
| H | 2.00592000  | 2.46138000  | 0.98792000  |
| C | 5.49468400  | -3.53136900 | -0.58968100 |
| H | 6.22720200  | -4.33153700 | -0.64772200 |
| C | 4.88427600  | -1.31127600 | 0.12676300  |
| H | 5.14143900  | -0.38850900 | 0.63897800  |
| C | -4.82341600 | 0.77485400  | -2.68156000 |
| H | -5.16049400 | 0.05662000  | -3.42365000 |
| C | 2.36590900  | 0.36665700  | 1.38531200  |
| C | 4.17876000  | 3.38314500  | -2.73848200 |
| H | 4.59029700  | 4.21420200  | -3.30412300 |
| C | -3.18373900 | 1.46541700  | -1.03832000 |
| C | 4.23031600  | -3.70119500 | -1.14173600 |
| H | 3.96339800  | -4.63433500 | -1.62845600 |
| C | -2.21745900 | 0.59015400  | 1.52853600  |
| C | 2.30198500  | -0.25126000 | 3.72737300  |
| H | 2.36090600  | -1.02191700 | 4.49006000  |
| C | -5.12673800 | 2.84101900  | -1.47377500 |
| H | -5.70560700 | 3.73819200  | -1.27441300 |
| C | -5.57269400 | 1.91790500  | -2.41945900 |
| H | -6.50001100 | 2.09667100  | -2.95621300 |
| C | -1.60023600 | -0.20298300 | 3.73764900  |
| H | -0.82175200 | -0.46404800 | 4.44682900  |
| C | 3.17681200  | 2.58916600  | -3.29002100 |
| H | 2.80203700  | 2.79652100  | -4.28815600 |
| C | 2.45290500  | -0.60405400 | 2.38899500  |
| H | 2.60745500  | -1.64626600 | 2.12861600  |

|   |             |             |             |
|---|-------------|-------------|-------------|
| C | -0.33618000 | 4.64428500  | 1.48569900  |
| H | -0.47088900 | 5.20965800  | 2.40358000  |
| C | 0.00960100  | 3.18444300  | -0.85118800 |
| H | 0.17655200  | 2.59454800  | -1.74769500 |
| C | 2.06395100  | 1.07425100  | 4.08242300  |
| H | 1.94458000  | 1.34756600  | 5.12701800  |
| C | 5.82099400  | -2.33378800 | 0.04783300  |
| H | 6.80580000  | -2.20050600 | 0.48642700  |
| C | 0.70954100  | 4.37097300  | -0.66888300 |
| H | 1.40753200  | 4.70371600  | -1.43163800 |
| C | 0.54170500  | 5.10161400  | 0.50689700  |
| H | 1.09866900  | 6.02115800  | 0.66173700  |
| C | -1.87562500 | -3.20034900 | -0.97878100 |
| C | -2.53683800 | -2.78663800 | 0.17981100  |
| C | -2.57147300 | -3.30991000 | -2.18569400 |
| C | -3.89862700 | -2.47745700 | 0.13283100  |
| C | -3.92213300 | -3.00867900 | -2.23486600 |
| C | -4.57660300 | -2.58990200 | -1.07078600 |
| H | -4.40584700 | -2.14449600 | 1.03193700  |
| H | -4.46858600 | -3.09315500 | -3.16815400 |
| H | -5.63256000 | -2.34051500 | -1.10626800 |
| H | -2.02675000 | -3.63585000 | -3.06533400 |
| N | -1.81425300 | -2.70596900 | 1.35674600  |
| H | -2.22633300 | -2.27140100 | 2.17332800  |
| C | -0.47437900 | -2.97391100 | 1.46866800  |
| O | 0.15541200  | -2.84665200 | 2.48409000  |
| O | 0.13311500  | -3.45840400 | 0.34105000  |
| C | -0.45061600 | -3.54196300 | -0.90684100 |
| O | 0.22821500  | -3.91899900 | -1.82505000 |

### IntA23

|    |             |             |             |
|----|-------------|-------------|-------------|
| Pd | -0.28707300 | -0.51831200 | 0.79527900  |
| P  | -1.41322100 | 0.86921100  | -0.59366600 |
| P  | 2.08660100  | 0.08790500  | 0.36726200  |
| C  | 0.10898500  | 1.81063500  | -4.31486700 |
| H  | 0.26127900  | 2.69403500  | -4.92773500 |
| C  | 1.89521100  | 0.72431700  | 3.07330300  |
| H  | 1.07473200  | 0.01078500  | 3.07541700  |
| C  | 3.64107600  | 1.91862200  | 1.92093200  |
| H  | 4.18527600  | 2.15465100  | 1.01138100  |
| C  | -0.59444900 | 3.03152100  | 0.96708200  |
| H  | 0.01571000  | 2.30054000  | 1.49118200  |
| C  | 2.86714300  | -2.50354500 | -0.24512400 |
| H  | 1.80979400  | -2.65789000 | -0.46650900 |
| C  | -2.21486100 | 3.56733800  | -0.73662900 |



|   |             |             |             |
|---|-------------|-------------|-------------|
| H | -2.87865600 | 3.25811700  | -1.53896600 |
| C | -1.42423100 | 2.61756400  | -0.07781600 |
| C | 4.66922600  | -1.07962700 | 0.51539100  |
| H | 5.02622400  | -0.12229400 | 0.88257600  |
| C | -2.16143000 | 4.90603400  | -0.36266400 |
| H | -2.77815200 | 5.63403500  | -0.88068600 |
| C | -3.40929200 | -0.72846300 | -1.69292900 |
| H | -2.60898000 | -1.32221600 | -2.12769200 |
| C | 3.10800100  | 0.74385600  | -2.16702800 |
| H | 3.30463200  | -0.31856600 | -2.27286900 |
| C | -3.15165000 | 0.40693200  | -0.91791900 |
| C | 5.56636100  | -2.12864200 | 0.35610100  |
| H | 6.61561200  | -1.98193200 | 0.59495500  |
| C | 2.55170900  | 1.23803800  | -0.98464400 |
| C | 5.11936600  | -3.36680800 | -0.10515300 |
| H | 5.82247100  | -4.18604300 | -0.22537200 |
| C | -0.42404400 | 1.94812400  | -3.03728200 |
| H | -0.67530600 | 2.93704000  | -2.66970800 |
| C | -5.77168300 | -0.49570400 | -1.24134100 |
| H | -6.79156900 | -0.84824200 | -1.36593900 |
| C | -4.20821600 | 1.07029000  | -0.28444300 |
| H | -4.01599600 | 1.91172400  | 0.37256700  |
| C | 2.23621900  | 1.36721400  | 4.26001500  |
| H | 1.68222600  | 1.14751900  | 5.16750700  |
| C | -0.60990000 | 0.81883200  | -2.23655300 |
| C | -1.32345800 | 5.30979900  | 0.67485600  |
| H | -1.28642300 | 6.35503400  | 0.96692300  |
| C | 2.59208900  | 0.99183200  | 1.88850100  |
| C | -4.71965800 | -1.16976400 | -1.85304900 |
| H | -4.90486300 | -2.05787500 | -2.44941900 |
| C | 3.31409600  | -1.26183500 | 0.21499300  |
| C | 0.28828400  | -0.57040600 | -3.99868000 |
| H | 0.55323600  | -1.55834400 | -4.36208100 |
| C | 3.98113600  | 2.56186800  | 3.10689900  |
| H | 4.79557800  | 3.28020100  | 3.11415400  |
| C | 3.27907600  | 2.28862700  | 4.27838200  |
| H | 3.54367700  | 2.79411600  | 5.20235400  |
| C | 3.77388700  | -3.55126200 | -0.40403900 |
| H | 3.41641200  | -4.51479700 | -0.75578100 |
| C | -0.54163700 | 4.37092100  | 1.34134800  |
| H | 0.10854200  | 4.67468700  | 2.15615700  |
| C | -0.22528400 | -0.43761600 | -2.71356400 |
| H | -0.32696300 | -1.31101100 | -2.07769000 |
| C | 3.41707500  | 1.60711900  | -3.21369800 |

|   |             |             |             |
|---|-------------|-------------|-------------|
| H | 3.84582800  | 1.20658300  | -4.12719100 |
| C | 2.29056700  | 2.60918000  | -0.88163800 |
| H | 1.85059900  | 3.01650000  | 0.02223200  |
| C | 0.45147600  | 0.55247800  | -4.80333800 |
| H | 0.85641900  | 0.45192800  | -5.80630400 |
| C | -5.51238000 | 0.62239400  | -0.45216300 |
| H | -6.32424900 | 1.13839700  | 0.05119000  |
| C | 2.60739200  | 3.47063100  | -1.92575600 |
| H | 2.40523200  | 4.53278100  | -1.82326800 |
| C | 3.17627400  | 2.97200600  | -3.09402400 |
| H | 3.42355300  | 3.64322300  | -3.91118900 |
| C | -2.08653200 | -0.55091900 | 1.72105900  |
| C | -2.98304900 | -1.62894600 | 1.57134600  |
| C | -2.38433200 | 0.48629600  | 2.60254500  |
| C | -4.17984100 | -1.59837700 | 2.30852500  |
| C | -3.56925500 | 0.49631800  | 3.33830000  |
| C | -4.47133100 | -0.55031200 | 3.16885200  |
| H | -4.88295300 | -2.42020300 | 2.19331500  |
| H | -3.78310000 | 1.31368200  | 4.02034200  |
| H | -5.41081800 | -0.55547000 | 3.71507700  |
| H | -1.69584200 | 1.31995800  | 2.71002600  |
| N | -2.68932300 | -2.71140500 | 0.77183100  |
| H | -3.48065400 | -3.20884900 | 0.39041800  |
| H | -1.92588400 | -2.60840500 | 0.10255900  |
| C | 0.18306200  | -3.54528800 | 1.83354600  |
| O | 0.07833700  | -4.69220900 | 1.70287600  |
| O | 0.34642600  | -2.41815100 | 2.12721000  |
| C | -0.55076200 | -3.63812400 | -1.56046300 |
| O | -0.17031200 | -2.90607800 | -0.57347500 |
| O | -1.53839300 | -3.41074900 | -2.27060400 |
| C | 0.34083300  | -4.84264600 | -1.85986700 |
| H | -0.12495300 | -5.50222400 | -2.59471200 |
| H | 1.29907700  | -4.48701100 | -2.25989900 |
| H | 0.55310600  | -5.39424300 | -0.93878000 |

**TSA8**

|    |             |             |             |
|----|-------------|-------------|-------------|
| Pd | 0.30990900  | -0.31449200 | -0.89728600 |
| P  | 1.22486100  | 1.12164300  | 0.60900000  |
| P  | -2.10334500 | -0.14821200 | -0.43145800 |
| C  | -0.63108100 | 2.10803900  | 4.16124300  |
| H  | -0.88257800 | 3.01014100  | 4.71082000  |
| C  | -2.26953800 | -0.17879700 | -3.21186400 |
| H  | -1.37962000 | -0.79924300 | -3.15643900 |
| C  | -4.02644600 | 1.08245900  | -2.14518700 |
| H  | -4.50116900 | 1.47293500  | -1.25010200 |

|   |             |             |             |               |             |             |             |
|---|-------------|-------------|-------------|---------------|-------------|-------------|-------------|
| C | 0.47535600  | 3.24412600  | -1.03589100 | C             | 0.41634200  | 4.57765000  | -1.42956000 |
| H | -0.05357600 | 2.48354500  | -1.60552300 | H             | -0.16437400 | 4.85636000  | -2.30350600 |
| C | -2.28140500 | -2.68502900 | 0.69753400  | C             | -0.03301900 | -0.19318400 | 2.71131500  |
| H | -1.19929800 | -2.62332300 | 0.83232500  | H             | 0.18208400  | -1.10299900 | 2.14940300  |
| C | 1.92215500  | 3.84503900  | 0.79777000  | C             | -3.72067500 | 1.85954800  | 2.78356800  |
| H | 2.52005400  | 3.56313300  | 1.65984200  | H             | -4.16965500 | 1.60101400  | 3.73768700  |
| C | 1.22019800  | 2.86609200  | 0.08367400  | C             | -2.54800000 | 2.50243100  | 0.35205400  |
| C | -4.38397600 | -1.76872100 | -0.08334800 | H             | -2.10541000 | 2.76602400  | -0.60262100 |
| H | -4.94472500 | -0.97242900 | -0.56453300 | C             | -0.94413000 | 0.85780400  | 4.68546000  |
| C | 1.86282500  | 5.17785100  | 0.40462600  | H             | -1.42837500 | 0.77997000  | 5.65469600  |
| H | 2.41012100  | 5.92914000  | 0.96544200  | C             | 5.32923800  | 0.93463300  | 0.62613300  |
| C | 3.19815300  | -0.49079800 | 1.70488600  | H             | 6.15656300  | 1.48654200  | 0.19022300  |
| H | 2.38337200  | -1.09731500 | 2.07994200  | C             | -2.96406500 | 3.51423000  | 1.20825700  |
| C | -3.30406100 | 0.84425900  | 1.92629000  | H             | -2.82472200 | 4.55201500  | 0.92021600  |
| H | -3.43266900 | -0.19262400 | 2.21904400  | C             | -3.55602300 | 3.19370800  | 2.42765700  |
| C | 2.95724000  | 0.69586300  | 1.00819900  | H             | -3.88276800 | 3.98184300  | 3.09962700  |
| C | -5.04715300 | -2.90818300 | 0.35312100  | C             | 2.14328000  | -0.23303500 | -1.74178400 |
| H | -6.12051100 | -2.99587600 | 0.21295700  | C             | 2.95811800  | -1.37396500 | -1.66267300 |
| C | -2.71835100 | 1.15703100  | 0.69878100  | C             | 2.54705100  | 0.84534000  | -2.52378500 |
| C | -4.33240000 | -3.93818000 | 0.96520100  | C             | 4.17172900  | -1.39602200 | -2.35688200 |
| H | -4.85141800 | -4.83047700 | 1.30353400  | C             | 3.75515200  | 0.81410700  | -3.22177000 |
| C | -0.00512800 | 2.21450500  | 2.92316700  | C             | 4.57009700  | -0.30801700 | -3.12464200 |
| H | 0.21058200  | 3.19933800  | 2.52488300  | H             | 4.80611600  | -2.27637800 | -2.28579500 |
| C | 5.56392200  | -0.25087500 | 1.31978100  | H             | 4.05342500  | 1.66382500  | -3.82885100 |
| H | 6.57813300  | -0.62464500 | 1.42689400  | H             | 5.52073800  | -0.34209100 | -3.64903700 |
| C | 4.03173700  | 1.40316400  | 0.45792700  | H             | 1.92805300  | 1.73482400  | -2.58983000 |
| H | 3.86220900  | 2.29548200  | -0.13485000 | N             | 2.50771000  | -2.50133800 | -0.96439300 |
| C | -2.81741300 | 0.11300900  | -4.45766900 | H             | 3.21137600  | -3.21657900 | -0.81197200 |
| H | -2.34139300 | -0.26946000 | -5.35536700 | H             | 2.03957900  | -2.32559200 | -0.05671700 |
| C | 0.31678900  | 1.06266000  | 2.20040700  | C             | 0.63787800  | -3.33157400 | -1.73962900 |
| C | 1.10755800  | 5.54582700  | -0.70705700 | O             | 0.81072900  | -4.48425600 | -1.64887900 |
| H | 1.06538400  | 6.58657300  | -1.01386300 | O             | 0.05400900  | -2.32615700 | -2.02166700 |
| C | -2.86783000 | 0.30397300  | -2.04144800 | C             | 1.41207900  | -3.60380500 | 1.81139500  |
| C | 4.49634000  | -0.96670200 | 1.85113900  | O             | 0.79005800  | -2.68860500 | 1.15368300  |
| H | 4.64255600  | -1.91959100 | 2.34792200  | O             | 2.64084500  | -3.72897600 | 1.86645400  |
| C | -2.99879900 | -1.65120500 | 0.08982000  | C             | 0.51141100  | -4.60627500 | 2.53518700  |
| C | -0.65189400 | -0.28876500 | 3.95357900  | H             | 1.08670400  | -5.22284500 | 3.22882700  |
| H | -0.90696500 | -1.26994600 | 4.34300400  | H             | -0.29083700 | -4.08572700 | 3.07012800  |
| C | -4.57155800 | 1.37365100  | -3.39196500 | H             | 0.04137100  | -5.25718200 | 1.78801800  |
| H | -5.47046900 | 1.97958400  | -3.45703900 |               |             |             |             |
| C | -3.96752000 | 0.89147700  | -4.55028800 | <b>IntA24</b> |             |             |             |
| H | -4.39290600 | 1.12173100  | -5.52256300 | Pd            | -0.25241400 | -0.46227600 | 0.91547200  |
| C | -2.95724500 | -3.82461700 | 1.13474500  | P             | -0.92267700 | 1.49058100  | -0.10791400 |
| H | -2.39429700 | -4.62559400 | 1.60436800  | P             | 2.09148700  | -0.49620200 | 0.16170600  |
|   |             |             |             | C             | 0.62654600  | 2.53662300  | -3.81725700 |

|   |             |             |             |   |             |             |             |
|---|-------------|-------------|-------------|---|-------------|-------------|-------------|
| H | 1.09967200  | 3.39343600  | -4.28700800 | H | 6.35834700  | 0.31402000  | 2.62594000  |
| C | 2.83576500  | -1.29860600 | 2.72178600  | C | 4.95370200  | -0.83340700 | 3.78821400  |
| H | 1.86198100  | -1.78038200 | 2.73467300  | H | 5.61519700  | -0.92589300 | 4.64480200  |
| C | 4.52371400  | -0.01640500 | 1.55935500  | C | 1.58173600  | -3.78540400 | -2.20671700 |
| H | 4.86085600  | 0.53056500  | 0.68446100  | H | 0.73929200  | -4.27818200 | -2.68154800 |
| C | 0.35514900  | 2.81523400  | 1.95401700  | C | 0.85657200  | 3.91177700  | 2.64974300  |
| H | 0.49164800  | 1.81166500  | 2.35133600  | H | 1.37617900  | 3.75929000  | 3.59049000  |
| C | 1.36319200  | -2.64320900 | -1.44328400 | C | -0.52478100 | 0.33605400  | -2.57795800 |
| H | 0.35458200  | -2.26042400 | -1.33432600 | H | -0.95195000 | -0.54292600 | -2.10422200 |
| C | -0.49646000 | 4.28691300  | 0.24375500  | C | 3.70849100  | 1.73050300  | -2.91638400 |
| H | -1.04479600 | 4.44896100  | -0.67931300 | H | 4.00812700  | 1.56880900  | -3.94753400 |
| C | -0.31343900 | 2.98820100  | 0.73701200  | C | 2.92217500  | 2.13085500  | -0.28383700 |
| C | 3.71928700  | -2.52973700 | -0.93200100 | H | 2.63053200  | 2.29535100  | 0.74881300  |
| H | 4.55240100  | -2.05142900 | -0.42449900 | C | 0.42013600  | 1.36762500  | -4.54121800 |
| C | 0.01052700  | 5.38151400  | 0.93612300  | H | 0.71759000  | 1.31172800  | -5.58414000 |
| H | -0.13255800 | 6.38209900  | 0.53973400  | C | -4.83104500 | 2.86092500  | 0.05819900  |
| C | -3.45123300 | 0.59640000  | -0.74613100 | H | -5.36815300 | 3.74540000  | 0.38785600  |
| H | -2.91897400 | -0.31240900 | -0.99788800 | C | 3.43692600  | 3.19002800  | -1.02121100 |
| C | 3.19164200  | 0.66781600  | -2.17868800 | H | 3.52704800  | 4.16970000  | -0.56112800 |
| H | 3.09327600  | -0.30906500 | -2.64064600 | C | 3.83551700  | 2.99055900  | -2.34166600 |
| C | -2.73849700 | 1.70070600  | -0.26838700 | H | 4.24162300  | 3.81565500  | -2.91966300 |
| C | 3.93662600  | -3.67037500 | -1.69646800 | C | -2.06328500 | -0.67409100 | 1.77228100  |
| H | 4.93984100  | -4.07631100 | -1.78603900 | C | -2.67007800 | -1.92992500 | 1.66627900  |
| C | 2.79971700  | 0.85675700  | -0.85270900 | C | -2.72203500 | 0.32176200  | 2.49311600  |
| C | 2.86821400  | -4.29878700 | -2.33473900 | C | -3.95840000 | -2.13298300 | 2.16583600  |
| H | 3.03994200  | -5.19653600 | -2.92132300 | C | -3.99637200 | 0.11705200  | 3.01667500  |
| C | 0.25464700  | 2.61279900  | -2.47773400 | C | -4.62573100 | -1.10820700 | 2.82560500  |
| H | 0.47407700  | 3.51770900  | -1.92501000 | H | -4.43769200 | -3.10004700 | 2.03538300  |
| C | -5.52915800 | 1.75972100  | -0.42400000 | H | -4.49866200 | 0.91797900  | 3.55120400  |
| H | -6.61386100 | 1.78100500  | -0.47018500 | H | -5.62977600 | -1.27690400 | 3.20339600  |
| C | -3.43947600 | 2.83312600  | 0.14310500  | H | -2.25781900 | 1.29740300  | 2.61770200  |
| H | -2.91932400 | 3.68760800  | 0.56168300  | N | -2.00167100 | -3.01243800 | 1.02343800  |
| C | 3.68939200  | -1.41581400 | 3.81491100  | H | -2.54614400 | -3.86873900 | 1.05023700  |
| H | 3.36158700  | -1.96999900 | 4.68923000  | H | -2.02067600 | -2.72574400 | -0.68200500 |
| C | -0.34097000 | 1.51858800  | -1.85009900 | C | -0.64065800 | -3.35294600 | 1.39404500  |
| C | 0.69272300  | 5.19495100  | 2.13667900  | O | -0.34413300 | -4.53339000 | 1.38641600  |
| H | 1.08710600  | 6.05116500  | 2.67558900  | O | 0.13690500  | -2.36241600 | 1.66308500  |
| C | 3.24753900  | -0.59072000 | 1.58508500  | C | -3.26639500 | -2.50605200 | -2.12666600 |
| C | -4.83502100 | 0.61922000  | -0.82523600 | O | -2.00966400 | -2.51505900 | -1.66810400 |
| H | -5.35995600 | -0.26717000 | -1.16707900 | O | -4.22715500 | -2.78238500 | -1.44284600 |
| C | 2.42877100  | -2.00596100 | -0.80569400 | C | -3.33271000 | -2.05927600 | -3.56552000 |
| C | -0.14851300 | 0.26245000  | -3.91390000 | H | -4.32779700 | -2.24982000 | -3.96779200 |
| H | -0.29305300 | -0.66660700 | -4.45725400 | H | -3.12363900 | -0.98387400 | -3.61122500 |
| C | 5.37071800  | -0.13689300 | 2.65733900  | H | -2.57410600 | -2.57117300 | -4.16371300 |

**TSA11**

|    |             |             |             |
|----|-------------|-------------|-------------|
| Pd | 0.19250300  | -0.60611600 | -1.09873800 |
| P  | 1.51314700  | 1.00101400  | -0.08925900 |
| P  | -2.05422500 | -0.21399800 | -0.19708600 |
| C  | 0.61061200  | 1.50427000  | 3.92574500  |
| H  | 0.29531400  | 2.30191900  | 4.59138200  |
| C  | -3.00134400 | 0.10473800  | -2.77921000 |
| H  | -2.04945000 | -0.34811600 | -3.04963500 |
| C  | -4.51382200 | 0.93088700  | -1.09109500 |
| H  | -4.74875200 | 1.12496900  | -0.04819200 |
| C  | 0.18775700  | 3.10400700  | -1.33440200 |
| H  | -0.38634500 | 2.30851600  | -1.80478700 |
| C  | -1.76302500 | -2.68412700 | 1.02438600  |
| H  | -0.70882900 | -2.42355000 | 1.03496700  |
| C  | 1.96850300  | 3.79109100  | 0.14044300  |
| H  | 2.78419600  | 3.53952900  | 0.81339600  |
| C  | 1.20469200  | 2.77044100  | -0.43713600 |
| C  | -4.04041600 | -2.17203100 | 0.41714700  |
| H  | -4.77228800 | -1.50943600 | -0.03515900 |
| C  | 1.69266100  | 5.12302700  | -0.14772400 |
| H  | 2.28685000  | 5.90924200  | 0.30853100  |
| C  | 4.19847300  | 0.77688100  | 0.85132000  |
| H  | 3.79934500  | 0.78816300  | 1.86071900  |
| C  | -2.56975100 | 0.49230800  | 2.50685500  |
| H  | -2.62264100 | -0.57111000 | 2.71686000  |
| C  | 3.33816700  | 0.88338700  | -0.24423200 |
| C  | -4.45345500 | -3.38987500 | 0.95016300  |
| H  | -5.50315100 | -3.66610800 | 0.91162700  |
| C  | -2.34598800 | 0.93885800  | 1.20298600  |
| C  | -3.52522700 | -4.25073600 | 1.53094200  |
| H  | -3.85019400 | -5.19998700 | 1.94708800  |
| C  | 0.84659100  | 1.78714400  | 2.58165700  |
| H  | 0.70369300  | 2.79871500  | 2.21684600  |
| C  | 6.09460200  | 0.60752300  | -0.63350200 |
| H  | 7.16397800  | 0.49226600  | -0.78458900 |
| C  | 3.87167300  | 0.85472900  | -1.53826100 |
| H  | 3.21055800  | 0.90222600  | -2.39816300 |
| C  | -3.90671000 | 0.47088300  | -3.77142900 |
| H  | -3.66293300 | 0.29642000  | -4.81508700 |
| C  | 1.23354300  | 0.77155700  | 1.70836800  |
| C  | 0.66173500  | 5.44764800  | -1.02883300 |
| H  | 0.45095500  | 6.48849200  | -1.25667000 |
| C  | -3.29924100 | 0.32309700  | -1.42989300 |
| C  | 5.57082300  | 0.63815100  | 0.65561600  |

|   |             |             |             |
|---|-------------|-------------|-------------|
| H | 6.22972400  | 0.54960800  | 1.51455700  |
| C | -2.69188000 | -1.80689900 | 0.45185200  |
| C | 1.13912900  | -0.81333100 | 3.53934300  |
| H | 1.25320300  | -1.82974600 | 3.90438100  |
| C | -5.41621600 | 1.30049200  | -2.08354500 |
| H | -6.35535000 | 1.77253700  | -1.80996800 |
| C | -5.11500500 | 1.06871400  | -3.42422600 |
| H | -5.81963700 | 1.36049800  | -4.19750900 |
| C | -2.17971500 | -3.89444700 | 1.56979800  |
| H | -1.44719400 | -4.56207900 | 2.01412600  |
| C | -0.08552500 | 4.43808600  | -1.62797800 |
| H | -0.87786300 | 4.68558500  | -2.32820800 |
| C | 1.37141700  | -0.53638200 | 2.19813500  |
| H | 1.66777000  | -1.33926000 | 1.52531600  |
| C | -2.72423500 | 1.40559400  | 3.54728000  |
| H | -2.89622800 | 1.04173200  | 4.55602600  |
| C | -2.26884400 | 2.31693100  | 0.96479200  |
| H | -2.09423500 | 2.68531700  | -0.04122900 |
| C | 0.75727800  | 0.20869300  | 4.40748600  |
| H | 0.56797600  | -0.00834900 | 5.45478700  |
| C | 5.24185600  | 0.72017100  | -1.73057400 |
| H | 5.64133800  | 0.68771200  | -2.73955000 |
| C | -2.42363900 | 3.22689700  | 2.00335200  |
| H | -2.36136000 | 4.29143900  | 1.79689600  |
| C | -2.65487000 | 2.77251000  | 3.30034300  |
| H | -2.77735700 | 3.48185000  | 4.11384400  |
| C | 1.72073100  | -1.59112800 | -2.10060700 |
| O | 2.03464300  | -1.23087200 | -3.20479500 |
| C | 2.39676500  | -2.49902800 | -1.09122300 |
| C | 1.28904300  | -3.32586800 | -0.88401400 |
| C | 3.59484500  | -2.65044300 | -0.43921400 |
| C | 1.37191900  | -4.41230500 | -0.03061800 |
| C | 3.67573800  | -3.73096900 | 0.46403900  |
| C | 2.59663200  | -4.58887800 | 0.64452900  |
| H | 0.53939100  | -5.09273200 | 0.12183900  |
| H | 4.59733700  | -3.90457900 | 1.01111000  |
| H | 2.69727000  | -5.42367300 | 1.33351900  |
| H | 4.43916700  | -1.99005500 | -0.61266400 |
| N | 0.27875000  | -2.71835300 | -1.64635600 |
| H | -0.29931000 | -3.27999800 | -2.25961000 |

**IntA28**

|    |             |             |             |
|----|-------------|-------------|-------------|
| Pd | -0.07940600 | -0.33066500 | -1.14271600 |
| P  | 1.72440700  | 0.81007900  | -0.25676800 |
| P  | -2.20908100 | 0.01043500  | -0.34209100 |

|   |             |             |             |
|---|-------------|-------------|-------------|
| C | 0.38899900  | 1.69466500  | 3.55319700  |
| H | -0.17572200 | 2.49092400  | 4.02888600  |
| C | -3.68161900 | -0.64559000 | -2.60750200 |
| H | -2.71208400 | -0.96733700 | -2.98185700 |
| C | -5.00159500 | 0.35052100  | -0.85530300 |
| H | -5.07521100 | 0.79893000  | 0.13169300  |
| C | 1.21892400  | 3.08865200  | -1.77567100 |
| H | 0.63790100  | 2.39645300  | -2.38139100 |
| C | -1.72973800 | -1.15284600 | 2.15081900  |
| H | -1.01513100 | -0.34556200 | 2.27096600  |
| C | 2.62923100  | 3.49076500  | 0.13360600  |
| H | 3.15329800  | 3.12841400  | 1.01387500  |
| C | 1.87679400  | 2.60365000  | -0.64352800 |
| C | -3.42889500 | -2.26697300 | 0.85818700  |
| H | -4.05895600 | -2.32901900 | -0.02453100 |
| C | 2.70001400  | 4.83813500  | -0.20208500 |
| H | 3.28071800  | 5.51884700  | 0.41375600  |
| C | 4.43225500  | 0.35455200  | 0.63242100  |
| H | 4.15455100  | 0.77211200  | 1.59592700  |
| C | -3.01241300 | 1.80306100  | 1.76350400  |
| H | -3.45313600 | 0.95352500  | 2.27681200  |
| C | 3.48530000  | 0.26693200  | -0.39313900 |
| C | -3.52628000 | -3.25009800 | 1.84269900  |
| H | -4.22975200 | -4.06822500 | 1.71593900  |
| C | -2.39655400 | 1.62963600  | 0.52124800  |
| C | -2.73472100 | -3.18102100 | 2.98632400  |
| H | -2.81677000 | -3.94536800 | 3.75377500  |
| C | 0.72939600  | 1.81201900  | 2.20739600  |
| H | 0.41953100  | 2.69538200  | 1.65828600  |
| C | 6.09916800  | -0.67252400 | -0.78234100 |
| H | 7.10949000  | -1.04445600 | -0.92751100 |
| C | 3.87311200  | -0.28203700 | -1.61865900 |
| H | 3.14558000  | -0.36440100 | -2.42106600 |
| C | -4.82353500 | -0.78096700 | -3.39487400 |
| H | -4.74922900 | -1.21641400 | -4.38717500 |
| C | 1.43969000  | 0.79435300  | 1.56203200  |
| C | 2.02959900  | 5.31426400  | -1.32831500 |
| H | 2.08628800  | 6.36710800  | -1.58965300 |
| C | -3.75945200 | -0.08557500 | -1.33030400 |
| C | 5.72816100  | -0.11668900 | 0.44037500  |
| H | 6.45028200  | -0.05005800 | 1.24941500  |
| C | -2.52850400 | -1.20769200 | 1.00136100  |
| C | 1.45767400  | -0.45975500 | 3.63918700  |
| H | 1.74121000  | -1.35434400 | 4.18706000  |

|   |             |             |             |
|---|-------------|-------------|-------------|
| C | -6.14147400 | 0.21986200  | -1.64060000 |
| H | -7.10032300 | 0.56347600  | -1.26325000 |
| C | -6.05425900 | -0.34864500 | -2.91109300 |
| H | -6.94561700 | -0.44793900 | -3.52390000 |
| C | -1.83895500 | -2.12335900 | 3.13889800  |
| H | -1.21095000 | -2.05362300 | 4.02247000  |
| C | 1.29381200  | 4.43701500  | -2.11920400 |
| H | 0.77577800  | 4.79989500  | -3.00223700 |
| C | 1.78513900  | -0.34963600 | 2.29232700  |
| H | 2.30669100  | -1.16614700 | 1.80228000  |
| C | -3.03802200 | 3.05744100  | 2.37028100  |
| H | -3.50896400 | 3.17400200  | 3.34240100  |
| C | -1.82697700 | 2.74233200  | -0.10600300 |
| H | -1.31997000 | 2.61051600  | -1.05645500 |
| C | 0.75746100  | 0.56337600  | 4.27653200  |
| H | 0.49374700  | 0.47542800  | 5.32661000  |
| C | 5.16930300  | -0.74841700 | -1.81625300 |
| H | 5.44226700  | -1.18355600 | -2.77287200 |
| C | -1.85707400 | 3.99664700  | 0.49240000  |
| H | -1.38654100 | 4.83963800  | -0.00559200 |
| C | -2.45757900 | 4.15502400  | 1.74016800  |
| H | -2.47003100 | 5.12908300  | 2.22085100  |
| C | 1.77427800  | -2.77000700 | -2.28059200 |
| O | 2.29221200  | -2.64541700 | -3.34966400 |
| C | 2.12708600  | -3.14334700 | -0.86126100 |
| C | 0.76005700  | -3.19027700 | -0.59746700 |
| C | 3.07939800  | -3.41373200 | 0.09396900  |
| C | 0.22784500  | -3.55550500 | 0.61408200  |
| C | 2.56895700  | -3.78970500 | 1.35015600  |
| C | 1.19462700  | -3.86097600 | 1.59059000  |
| H | -0.83400400 | -3.58756500 | 0.82879300  |
| H | 3.25789100  | -4.02484000 | 2.15550700  |
| H | 0.84993000  | -4.14558300 | 2.58066100  |
| H | 4.14500000  | -3.33889100 | -0.09453800 |
| N | 0.37229100  | -2.68420700 | -1.89441200 |
| H | -0.34053200 | -3.12990200 | -2.46331300 |

**TSA12**

|    |             |             |             |
|----|-------------|-------------|-------------|
| Pd | 0.19306100  | -1.00404600 | -0.29353300 |
| P  | 1.59878100  | 0.81721000  | 0.12997900  |
| P  | -2.13896600 | -0.16805300 | -0.20402400 |
| C  | 0.25417400  | 4.03558100  | 2.35851600  |
| H  | 0.30038600  | 5.12032900  | 2.32255000  |
| C  | -2.95190000 | -2.46345000 | -1.55775900 |
| H  | -1.92448900 | -2.78722900 | -1.41526000 |

|   |             |             |             |
|---|-------------|-------------|-------------|
| C | -4.70096200 | -0.83163300 | -1.22409000 |
| H | -5.03111000 | 0.13141600  | -0.84344700 |
| C | 0.87856000  | 2.09434200  | -2.23059500 |
| H | -0.01611100 | 1.48385900  | -2.15735400 |
| C | -2.41803100 | -1.10750300 | 2.37460800  |
| H | -1.72875100 | -1.88298600 | 2.04416900  |
| C | 3.03725700  | 2.75266400  | -1.37931900 |
| H | 3.83086500  | 2.65822200  | -0.64388400 |
| C | 1.88429600  | 1.96763700  | -1.26799700 |
| C | -3.73849300 | 0.86463900  | 1.93717500  |
| H | -4.07586300 | 1.64748800  | 1.26437900  |
| C | 3.17385700  | 3.65353100  | -2.43141700 |
| H | 4.07417400  | 4.25585700  | -2.51082800 |
| C | 3.74167800  | 0.97317000  | 1.99792400  |
| H | 3.08355800  | 1.55560800  | 2.63526100  |
| C | -2.05111600 | 2.63885700  | -0.18648200 |
| H | -1.76743400 | 2.55256400  | 0.85732500  |
| C | 3.29125800  | 0.51485300  | 0.75643800  |
| C | -4.20229000 | 0.84278000  | 3.24961300  |
| H | -4.89990800 | 1.60426200  | 3.58633700  |
| C | -2.40642400 | 1.49792400  | -0.91637000 |
| C | -3.77710400 | -0.15279300 | 4.12571500  |
| H | -4.14062000 | -0.16870600 | 5.14923000  |
| C | 0.91647900  | 3.28508600  | 1.39061300  |
| H | 1.45984300  | 3.78873900  | 0.59702500  |
| C | 5.89389800  | -0.05082200 | 1.61170400  |
| H | 6.90409800  | -0.27081200 | 1.94490100  |
| C | 4.15438500  | -0.23557700 | -0.04830200 |
| H | 3.81415600  | -0.61218600 | -1.00920600 |
| C | -3.86508700 | -3.30536800 | -2.19136400 |
| H | -3.53726800 | -4.27351100 | -2.55751000 |
| C | 0.85416900  | 1.88906700  | 1.41949600  |
| C | 2.16036400  | 3.78264900  | -3.37862400 |
| H | 2.26907600  | 4.48770100  | -4.19775500 |
| C | -3.36359900 | -1.21940300 | -1.07490300 |
| C | 5.03717000  | 0.68908600  | 2.42251700  |
| H | 5.37716200  | 1.05097100  | 3.38855500  |
| C | -2.83177900 | -0.10100100 | 1.49342200  |
| C | -0.53057600 | 2.00978200  | 3.40705400  |
| H | -1.11344800 | 1.50221100  | 4.16974100  |
| C | -5.60699100 | -1.66919900 | -1.86197600 |
| H | -6.64176700 | -1.35994900 | -1.97685300 |
| C | -5.18821400 | -2.90822000 | -2.34792400 |
| H | -5.89841900 | -3.56411300 | -2.84313500 |

|   |             |             |             |
|---|-------------|-------------|-------------|
| C | -2.89181900 | -1.13340500 | 3.68262600  |
| H | -2.56424400 | -1.92265900 | 4.35233900  |
| C | 1.01203300  | 3.00249800  | -3.27589400 |
| H | 0.21473100  | 3.09595600  | -4.00684900 |
| C | 0.13684700  | 1.26113000  | 2.44297300  |
| H | 0.07020100  | 0.17681400  | 2.46385200  |
| C | -2.04952300 | 3.89235100  | -0.78825400 |
| H | -1.76128600 | 4.76113000  | -0.20401900 |
| C | -2.76005200 | 1.64434400  | -2.26311100 |
| H | -3.03401400 | 0.77266400  | -2.85031800 |
| C | -0.47768300 | 3.40089600  | 3.36086200  |
| H | -1.00935600 | 3.99054700  | 4.10195500  |
| C | 5.44925900  | -0.51146800 | 0.37501700  |
| H | 6.10221000  | -1.10218400 | -0.26046300 |
| C | -2.75969700 | 2.90129100  | -2.86231900 |
| H | -3.04062900 | 2.99678600  | -3.90731000 |
| C | -2.40079600 | 4.02873600  | -2.12834000 |
| H | -2.39298700 | 5.00736400  | -2.59888800 |
| C | 1.58335500  | -2.50597500 | -0.80606000 |
| C | 2.45865100  | -3.12821200 | 0.10410000  |
| C | 1.90762700  | -2.46310500 | -2.16247300 |
| C | 3.73404700  | -3.50297400 | -0.27899500 |
| C | 3.20467000  | -2.82594000 | -2.54083700 |
| C | 4.12022900  | -3.31464500 | -1.61070400 |
| H | 4.40323800  | -3.97398400 | 0.43547900  |
| H | 3.49546100  | -2.72034100 | -3.58206200 |
| H | 5.11876700  | -3.59969400 | -1.92622500 |
| H | 1.19804800  | -2.08982900 | -2.89435700 |
| N | 1.77633400  | -3.44181400 | 1.27350200  |
| H | 2.19599200  | -3.90636700 | 2.06277200  |
| C | 0.40631500  | -3.57536900 | 1.08068800  |
| O | -0.36852800 | -3.99677600 | 1.91539400  |
| O | 0.06136500  | -3.19891200 | -0.15953700 |

### IntA29

|    |             |             |             |
|----|-------------|-------------|-------------|
| Pd | -0.02303200 | -0.70532800 | -0.67818200 |
| P  | 1.66684100  | 0.80150100  | -0.18289700 |
| P  | -2.21420600 | -0.23914900 | -0.10275400 |
| C  | 0.90458300  | 3.39250600  | 2.96285300  |
| H  | 0.95887400  | 4.45945200  | 3.16065000  |
| C  | -3.38372500 | -1.63289000 | -2.19353400 |
| H  | -2.36611200 | -1.62729900 | -2.57952400 |
| C  | -4.94561500 | -1.04809500 | -0.45529200 |
| H  | -5.16196500 | -0.59508700 | 0.50777900  |
| C  | 0.60727700  | 2.69016000  | -1.91506500 |

|   |             |             |             |
|---|-------------|-------------|-------------|
| H | -0.29471100 | 2.09188800  | -1.81953200 |
| C | -1.89385700 | -1.56282700 | 2.31639100  |
| H | -1.17554800 | -2.15640300 | 1.75681500  |
| C | 2.93120500  | 3.06349900  | -1.39001400 |
| H | 3.84479600  | 2.76704200  | -0.88242500 |
| C | 1.77408500  | 2.28840400  | -1.25587300 |
| C | -3.45605200 | 0.26669300  | 2.42799200  |
| H | -3.97352900 | 1.09833700  | 1.95787700  |
| C | 2.91938000  | 4.21737700  | -2.16897100 |
| H | 3.82486900  | 4.80910200  | -2.26910500 |
| C | 4.06352500  | 0.17055000  | 1.23085000  |
| H | 3.55080200  | 0.47234900  | 2.13844700  |
| C | -1.97082300 | 2.47323400  | 0.55546500  |
| H | -1.43711000 | 2.12156100  | 1.43332100  |
| C | 3.42898900  | 0.30008700  | -0.00714000 |
| C | -3.65558300 | 0.01151300  | 3.78173900  |
| H | -4.33823100 | 0.63472600  | 4.35227000  |
| C | -2.56084100 | 1.55378500  | -0.32246100 |
| C | -2.97861500 | -1.03478600 | 4.40407500  |
| H | -3.13222700 | -1.22984500 | 5.46158800  |
| C | 1.35431400  | 2.89471900  | 1.74155800  |
| H | 1.73940300  | 3.58062500  | 0.99349000  |
| C | 6.01455000  | -0.78021100 | 0.16531500  |
| H | 7.01437500  | -1.19904100 | 0.23286300  |
| C | 4.10972100  | -0.11438800 | -1.16069100 |
| H | 3.62051500  | -0.03485200 | -2.12851300 |
| C | -4.41032100 | -2.23153600 | -2.92060300 |
| H | -4.19735800 | -2.69257900 | -3.88084000 |
| C | 1.27470000  | 1.52763600  | 1.46432500  |
| C | 1.74907900  | 4.61594900  | -2.81134900 |
| H | 1.74094200  | 5.51965800  | -3.41415800 |
| C | -3.64056500 | -1.03007300 | -0.95830600 |
| C | 5.34528700  | -0.37250400 | 1.31692500  |
| H | 5.81729700  | -0.47851400 | 2.28898100  |
| C | -2.57253400 | -0.51842500 | 1.67954700  |
| C | 0.31268400  | 1.16324700  | 3.66213100  |
| H | -0.10977600 | 0.48114800  | 4.39358100  |
| C | -5.96971800 | -1.65472800 | -1.17488700 |
| H | -6.97821200 | -1.66775800 | -0.77168500 |
| C | -5.70463500 | -2.24478300 | -2.40984300 |
| H | -6.50654700 | -2.71757700 | -2.96947400 |
| C | -2.09812000 | -1.82395100 | 3.66808000  |
| H | -1.55522200 | -2.63381600 | 4.14620700  |
| C | 0.59239800  | 3.85216700  | -2.68006300 |

|   |             |             |             |
|---|-------------|-------------|-------------|
| H | -0.32756600 | 4.15540400  | -3.17078500 |
| C | 0.75893500  | 0.66782900  | 2.44207800  |
| H | 0.67402300  | -0.39485000 | 2.23312900  |
| C | -2.04675400 | 3.83794900  | 0.30711900  |
| H | -1.57260900 | 4.53057700  | 0.99615800  |
| C | -3.23108000 | 2.03462400  | -1.45038800 |
| H | -3.69575500 | 1.33924200  | -2.14382900 |
| C | 0.37592800  | 2.53100400  | 3.92080800  |
| H | 0.01014700  | 2.92445900  | 4.86481300  |
| C | 5.39387200  | -0.64056300 | -1.07807800 |
| H | 5.91079600  | -0.94951400 | -1.98251800 |
| C | -3.30137000 | 3.40432800  | -1.70047000 |
| H | -3.82513400 | 3.76185800  | -2.58266700 |
| C | -2.70786000 | 4.30935800  | -0.82558700 |
| H | -2.75867900 | 5.37583000  | -1.02478600 |
| C | 1.09042700  | -3.15485700 | -0.33556500 |
| C | 2.41622900  | -3.03971100 | -0.76075200 |
| C | 0.02859400  | -3.29175600 | -1.21538000 |
| C | 2.74251700  | -3.05031300 | -2.10295000 |
| C | 0.36018500  | -3.27173800 | -2.58242600 |
| C | 1.68058500  | -3.15177900 | -3.01015400 |
| H | 3.77027300  | -2.96317200 | -2.43614400 |
| H | -0.43518200 | -3.36914300 | -3.31413300 |
| H | 1.89467800  | -3.14855200 | -4.07415200 |
| H | -0.98385100 | -3.46566700 | -0.87078400 |
| N | 3.16664800  | -2.94951300 | 0.40441200  |
| H | 4.11214800  | -2.59873900 | 0.47263200  |
| C | 2.33488100  | -2.94135000 | 1.50183400  |
| O | 2.60124600  | -2.77993200 | 2.66154500  |
| O | 1.05245700  | -3.16963700 | 1.03786000  |

### IntA30

|    |             |             |             |
|----|-------------|-------------|-------------|
| Pd | -0.98913100 | -1.05133700 | -0.12810200 |
| P  | 1.05190500  | 0.14117300  | -0.01808700 |
| C  | 4.12702700  | -1.78810200 | 1.96050100  |
| H  | 4.61365000  | -1.73606700 | 2.92983900  |
| C  | 0.27693100  | 1.24331800  | 2.40470700  |
| H  | -0.39801400 | 0.39211900  | 2.45062200  |
| C  | 1.92130500  | 2.54147400  | 1.20710500  |
| H  | 2.53837100  | 2.70689000  | 0.32951800  |
| C  | 1.08446800  | 1.42602200  | 1.27858200  |
| C  | 1.95454200  | 3.45757300  | 2.25408500  |
| H  | 2.60135200  | 4.32717900  | 2.18726900  |
| C  | 2.98403600  | 1.18020200  | -1.79252400 |
| H  | 3.72333400  | 0.87441400  | -1.05761700 |

|              |             |             |             |   |             |             |             |
|--------------|-------------|-------------|-------------|---|-------------|-------------|-------------|
| C            | 1.62354600  | 0.94040200  | -1.56126000 | H | 0.99155500  | -0.92051900 | -2.73066000 |
| C            | 3.10258800  | -0.89260200 | 1.65662100  | C | 3.65208600  | -1.12053400 | -0.61767000 |
| H            | 2.80266700  | -0.15110700 | 2.39033900  | H | 3.95304400  | -0.84756900 | 0.38977500  |
| C            | 2.46023000  | 2.17286700  | -3.92635500 | C | 2.36574500  | -0.81228300 | -1.07368700 |
| H            | 2.78461900  | 2.65016100  | -4.84634700 | C | 4.55176800  | -1.77042600 | -1.45626800 |
| C            | 0.68797100  | 1.31722000  | -2.52889800 | H | 5.54997100  | -2.00433100 | -1.09846000 |
| H            | -0.36727800 | 1.14133300  | -2.35568500 | C | 0.81344700  | -2.64697400 | 0.94788200  |
| C            | 2.46689400  | -0.94695000 | 0.41516200  | H | 1.66448100  | -2.92290400 | 0.33267700  |
| C            | 1.15675200  | 3.26446000  | 3.37870900  | C | 0.37602200  | -1.32189400 | 0.98978400  |
| H            | 1.18234500  | 3.98266700  | 4.19286100  | C | 2.66318200  | 2.19694100  | 0.76117500  |
| C            | 3.39876300  | 1.79637300  | -2.96847800 | H | 2.44608100  | 2.55967300  | -0.24150100 |
| H            | 4.45595100  | 1.97715900  | -3.13813700 | C | -0.95840200 | -3.28077800 | 2.46038200  |
| C            | 3.89888200  | -2.79771300 | -0.21472500 | H | -1.48574300 | -4.04712600 | 3.02067100  |
| H            | 4.20771100  | -3.53585600 | -0.94869600 | C | -0.73245700 | -0.98227900 | 1.77562100  |
| C            | 0.31721700  | 2.15600400  | 3.45316600  | H | -1.09248200 | 0.04395900  | 1.79160500  |
| H            | -0.31780000 | 2.00783600  | 4.32112800  | C | 2.15033900  | 0.96492900  | 1.18337900  |
| C            | 2.87424500  | -1.90987100 | -0.51773600 | C | 4.17357800  | -2.11546600 | -2.75215900 |
| H            | 2.39472100  | -1.95588900 | -1.49306200 | H | 4.87839900  | -2.62054300 | -3.40609700 |
| C            | 4.52684900  | -2.73974000 | 1.02882600  | C | 0.14566000  | -3.62248800 | 1.68486500  |
| H            | 5.32569600  | -3.43520400 | 1.26792100  | H | 0.48492600  | -4.65316100 | 1.64300600  |
| C            | 1.10745300  | 1.93166900  | -3.70518300 | C | 3.21862700  | 1.27918300  | 3.32836200  |
| H            | 0.37227800  | 2.22043300  | -4.44990300 | H | 3.43048100  | 0.92091400  | 4.33127000  |
| C            | -2.05378300 | 0.71886700  | -0.18670500 | C | 2.89497400  | -1.80899200 | -3.20979500 |
| O            | -1.53766400 | 1.80897100  | -0.29017400 | H | 2.59847600  | -2.07395700 | -4.22001000 |
| C            | -3.49488400 | 0.46876400  | -0.11547500 | C | 2.43167200  | 0.51061100  | 2.47388200  |
| C            | -3.88031400 | -0.89144200 | -0.07657000 | H | 2.03251200  | -0.44050700 | 2.81331300  |
| C            | -4.43802700 | 1.50389600  | -0.09951400 | C | 3.72980500  | 2.50109000  | 2.90081300  |
| C            | -5.26826100 | -1.17415500 | -0.01320700 | H | 4.34067200  | 3.09906800  | 3.57036900  |
| C            | -5.78770000 | 1.20944000  | -0.03564800 | C | -1.39593100 | -1.95879600 | 2.50775900  |
| C            | -6.18384900 | -0.13972000 | 0.00718000  | H | -2.27179700 | -1.68865300 | 3.08877500  |
| H            | -5.60344600 | -2.20788200 | 0.01871600  | C | -1.70654300 | -0.16752100 | -1.43409500 |
| H            | -6.53017500 | 2.00029200  | -0.01817500 | O | -1.27947700 | -0.79186400 | -2.36471800 |
| H            | -7.24340700 | -0.37993000 | 0.05730700  | C | -2.83397900 | -0.38528600 | -0.58069700 |
| H            | -4.08298100 | 2.52979000  | -0.13473200 | C | -3.38175500 | 0.59809700  | 0.32234300  |
| N            | -2.89164300 | -1.80623300 | -0.10944600 | C | -3.39059100 | -1.69203300 | -0.66114900 |
| H            | -3.17968300 | -2.77421200 | -0.07000900 | C | -4.50269000 | 0.14944200  | 1.10772100  |
| C            | -0.17468300 | -2.98024900 | -0.05552300 | C | -4.43949800 | -2.07510000 | 0.12874600  |
| O            | 0.10689700  | -4.07830000 | 0.01716200  | C | -4.99317300 | -1.12385900 | 1.02166700  |
| <b>TSA13</b> |             |             |             |   |             |             |             |
| Pd           | -0.52106400 | 1.39925800  | -0.95556400 | H | -4.94898000 | 0.86192900  | 1.79740100  |
| P            | 1.13748800  | 0.00817000  | -0.00169900 | H | -4.84260300 | -3.08019600 | 0.07153000  |
| C            | 3.45272200  | 2.95925600  | 1.61430700  | H | -5.83240000 | -1.40974900 | 1.65151200  |
| H            | 3.84579800  | 3.91362800  | 1.27770600  | H | -2.93718100 | -2.38989900 | -1.35800800 |
| C            | 1.99088300  | -1.15603800 | -2.37663400 | N | -2.87675100 | 1.82014100  | 0.42932700  |
|              |             |             |             | H | -3.44216200 | 2.41888600  | 1.02858900  |



|   |             |            |             |
|---|-------------|------------|-------------|
| C | -2.03955100 | 2.74018100 | -1.28689600 |
| O | -2.68737600 | 3.65408300 | -1.55217400 |

### IntA31

|    |             |             |             |
|----|-------------|-------------|-------------|
| Pd | 0.91297000  | -1.02316100 | -0.19504000 |
| P  | -1.31308100 | 0.00249200  | 0.00312000  |
| C  | -3.31233800 | -3.47369200 | 0.78712700  |
| H  | -3.18715200 | -4.51796800 | 0.51818400  |
| C  | -1.27833400 | 1.40228300  | -2.38801200 |
| H  | -0.25648000 | 1.63195400  | -2.09874600 |
| C  | -3.38399000 | 0.31006800  | -1.92104400 |
| H  | -4.00535300 | -0.30996400 | -1.28201600 |
| C  | -2.07013300 | 0.60709400  | -1.54998500 |
| C  | -3.90180300 | 0.80571100  | -3.11559200 |
| H  | -4.92284900 | 0.56737100  | -3.39863000 |
| C  | -2.31069100 | 2.48197900  | 0.94734100  |
| H  | -2.97661500 | 2.47779000  | 0.08910800  |
| C  | -1.40269500 | 1.43574100  | 1.13170900  |
| C  | -2.39812100 | -2.52883200 | 0.33181900  |
| H  | -1.56391300 | -2.84825500 | -0.29047000 |
| C  | -1.49896700 | 3.55204300  | 2.95191100  |
| H  | -1.53466400 | 4.37677500  | 3.65762800  |
| C  | -0.53558300 | 1.46415900  | 2.22781000  |
| H  | 0.18965800  | 0.66500100  | 2.36020800  |
| C  | -2.54321200 | -1.17892000 | 0.67076900  |
| C  | -3.11433900 | 1.60124300  | -3.94228000 |
| H  | -3.51987900 | 1.98581600  | -4.87355200 |
| C  | -2.35769900 | 3.53563700  | 1.85595900  |
| H  | -3.06356900 | 4.34681300  | 1.70407200  |
| C  | -4.52204400 | -1.73872100 | 1.94508200  |
| H  | -5.34629000 | -1.42883100 | 2.58061800  |
| C  | -1.80348900 | 1.89985100  | -3.57541300 |
| H  | -1.18448300 | 2.51796500  | -4.21874400 |
| C  | -3.61149200 | -0.79159500 | 1.48553500  |
| H  | -3.72904100 | 0.25087900  | 1.76645000  |
| C  | -4.37548300 | -3.07882600 | 1.59501800  |
| H  | -5.08564200 | -3.81604600 | 1.95761600  |
| C  | -0.58753300 | 2.51519500  | 3.13703700  |
| H  | 0.09131300  | 2.52972300  | 3.98429700  |
| C  | 2.07747600  | 0.57137600  | -0.34257000 |
| O  | 1.51072100  | 1.61535400  | -0.59112900 |
| C  | 3.55071700  | 0.53004700  | -0.14005400 |
| C  | 4.31002600  | -0.65420400 | -0.05340100 |
| C  | 4.20883500  | 1.76532300  | -0.03379000 |
| C  | 5.69705400  | -0.55749400 | 0.13206600  |

|   |            |             |             |
|---|------------|-------------|-------------|
| C | 5.57626200 | 1.85233000  | 0.15620200  |
| C | 6.32027200 | 0.67428300  | 0.23657900  |
| H | 6.28494200 | -1.46968100 | 0.19588400  |
| H | 6.06080000 | 2.81962000  | 0.23850100  |
| H | 7.39560400 | 0.71453100  | 0.38329600  |
| H | 3.59834100 | 2.65903700  | -0.10839300 |
| N | 3.76967600 | -1.93133900 | -0.15867900 |
| H | 4.41168900 | -2.71526900 | -0.12808300 |
| C | 2.44081000 | -2.25087900 | -0.21838600 |
| O | 2.06607900 | -3.41498700 | -0.26763100 |

### IntA32

|    |             |             |             |
|----|-------------|-------------|-------------|
| Pd | -0.49127600 | -0.96037300 | -0.26162200 |
| P  | -1.11533500 | 1.36215400  | 0.07643000  |
| P  | 1.97169500  | -0.67145000 | 0.00668800  |
| C  | 0.65325400  | 4.44805100  | -2.05084300 |
| H  | 1.18025300  | 5.37707500  | -1.85458300 |
| C  | 2.02071200  | -1.96773600 | 2.47059300  |
| H  | 1.03070800  | -2.30698200 | 2.18579800  |
| C  | 4.03956600  | -0.75386900 | 1.96194800  |
| H  | 4.61614300  | -0.11279000 | 1.30152200  |
| C  | 0.04462200  | 1.21112500  | 2.60293600  |
| H  | 0.27560900  | 0.18918400  | 2.31826000  |
| C  | 2.08596100  | -1.87311900 | -2.48938900 |
| H  | 1.04975700  | -1.55144300 | -2.56408400 |
| C  | -0.95888800 | 3.34339500  | 2.10411600  |
| H  | -1.52975200 | 3.98533600  | 1.43850000  |
| C  | -0.62467400 | 2.04402500  | 1.70385400  |
| C  | 4.11585300  | -2.09215600 | -1.20909800 |
| H  | 4.67856300  | -1.93864600 | -0.29390500 |
| C  | -0.57761400 | 3.81288400  | 3.35605500  |
| H  | -0.83446600 | 4.82524800  | 3.65346300  |
| C  | -3.50087900 | 2.74586500  | -0.64557800 |
| H  | -2.88773200 | 3.37999300  | -1.27863700 |
| C  | 3.02668500  | 1.42412900  | -1.56381300 |
| H  | 2.92292900  | 0.74190300  | -2.40147800 |
| C  | -2.91597900 | 1.71077500  | 0.08461700  |
| C  | 4.71055800  | -2.76365800 | -2.27280100 |
| H  | 5.73217700  | -3.12034700 | -2.17967800 |
| C  | 2.67245700  | 1.01120300  | -0.27500500 |
| C  | 3.99913900  | -2.98096300 | -3.44984200 |
| H  | 4.46580400  | -3.50490700 | -4.27893900 |
| C  | 0.20371700  | 3.67648900  | -0.98186300 |
| H  | 0.40161600  | 4.00545600  | 0.03220500  |
| C  | -5.67320700 | 2.14538300  | 0.22184800  |

|   |             |             |             |
|---|-------------|-------------|-------------|
| H | -6.74543800 | 2.31164500  | 0.26939700  |
| C | -3.72282300 | 0.89367900  | 0.88298400  |
| H | -3.27866800 | 0.06797800  | 1.43398600  |
| C | 2.55826600  | -2.34400400 | 3.69833200  |
| H | 1.97561200  | -2.96543200 | 4.37173200  |
| C | -0.46181500 | 2.47437600  | -1.21859300 |
| C | 0.12059500  | 2.98281400  | 4.23285800  |
| H | 0.41496100  | 3.35227500  | 5.21082500  |
| C | 2.75437600  | -1.16742700 | 1.58931800  |
| C | -4.87597400 | 2.95955300  | -0.57672600 |
| H | -5.32392000 | 3.76299300  | -1.15412100 |
| C | 2.79981300  | -1.63868500 | -1.31070700 |
| C | -0.20711300 | 2.81706200  | -3.60036400 |
| H | -0.36755900 | 2.47665300  | -4.61906000 |
| C | 4.57827600  | -1.13522300 | 3.18644100  |
| H | 5.57628900  | -0.80678300 | 3.46129200  |
| C | 3.83702800  | -1.92918300 | 4.05840100  |
| H | 4.25592200  | -2.22241100 | 5.01667100  |
| C | 2.68506900  | -2.53436800 | -3.55668400 |
| H | 2.11859400  | -2.71191400 | -4.46592300 |
| C | 0.42123000  | 1.67663600  | 3.86025400  |
| H | 0.94999800  | 1.01457200  | 4.53960900  |
| C | -0.65693400 | 2.04134400  | -2.53855400 |
| H | -1.17739600 | 1.10339300  | -2.72272900 |
| C | 3.53039900  | 2.70175500  | -1.78485400 |
| H | 3.79987700  | 3.00255200  | -2.79265100 |
| C | 2.80811200  | 1.92087800  | 0.78057000  |
| H | 2.53599100  | 1.63151200  | 1.78985400  |
| C | 0.44627400  | 4.02431300  | -3.35873400 |
| H | 0.79920600  | 4.62877700  | -4.18939900 |
| C | -5.09342100 | 1.11120500  | 0.95431000  |
| H | -5.70920600 | 0.46051400  | 1.56785000  |
| C | 3.31669000  | 3.19674100  | 0.55839600  |
| H | 3.42454600  | 3.88156600  | 1.39463700  |
| C | 3.68715800  | 3.58878400  | -0.72425500 |
| H | 4.08809600  | 4.58318900  | -0.89828600 |
| C | -2.27878600 | -1.31154600 | -1.10749400 |
| O | -2.56963000 | -0.65936700 | -2.09463700 |
| C | -3.21714900 | -2.30723400 | -0.54394000 |
| C | -2.74848500 | -3.47194100 | 0.08577700  |
| C | -4.59173000 | -2.06537000 | -0.62629300 |
| C | -3.68141800 | -4.36757500 | 0.62555000  |
| C | -5.50931200 | -2.94611200 | -0.07313000 |
| C | -5.04149700 | -4.10300200 | 0.55126300  |

|   |             |             |             |
|---|-------------|-------------|-------------|
| H | -3.32843000 | -5.27617900 | 1.10711100  |
| H | -6.57388400 | -2.74357600 | -0.13386200 |
| H | -5.74307800 | -4.80952500 | 0.98565600  |
| H | -4.91470600 | -1.15934300 | -1.12963300 |
| N | -1.39884100 | -3.79715100 | 0.13960300  |
| H | -1.16364700 | -4.74471200 | 0.41368700  |
| C | -0.28600700 | -2.99718000 | -0.09565700 |
| O | 0.80435400  | -3.55099000 | -0.00807600 |

### TSA14

|    |             |             |             |
|----|-------------|-------------|-------------|
| Pd | -0.21324000 | -0.86536500 | -0.64048800 |
| P  | -1.33476500 | 1.13046200  | -0.01096800 |
| P  | 2.07522100  | -0.45043500 | 0.04385300  |
| C  | 0.23794900  | 4.68140400  | -1.49747500 |
| H  | 0.50587700  | 5.66951200  | -1.13492100 |
| C  | 1.69325700  | -2.28378300 | 2.08437400  |
| H  | 0.89603800  | -2.64408700 | 1.43695000  |
| C  | 3.48124800  | -0.73137200 | 2.53045300  |
| H  | 4.08015400  | 0.12939300  | 2.24812500  |
| C  | -0.54448000 | 0.73312300  | 2.61411100  |
| H  | -0.16758600 | -0.20988500 | 2.22891600  |
| C  | 3.05921300  | -1.60419400 | -2.29239800 |
| H  | 2.01270700  | -1.72298800 | -2.55445900 |
| C  | -1.69075600 | 2.82129400  | 2.26115300  |
| H  | -2.24235900 | 3.49804600  | 1.61466100  |
| C  | -1.17188400 | 1.62733800  | 1.74349400  |
| C  | 4.76756500  | -0.94410100 | -0.72055900 |
| H  | 5.05857600  | -0.51235100 | 0.23229800  |
| C  | -1.52863000 | 3.13515200  | 3.60611600  |
| H  | -1.92683800 | 4.06815400  | 3.99388000  |
| C  | -3.65355500 | 1.50488100  | -1.56998100 |
| H  | -2.97837100 | 1.66609400  | -2.40344700 |
| C  | 3.02023600  | 2.01667800  | -0.88961500 |
| H  | 3.18733700  | 1.49167000  | -1.82543300 |
| C  | -3.14734300 | 1.28889100  | -0.28363300 |
| C  | 5.74965300  | -1.37888500 | -1.60066300 |
| H  | 6.79736300  | -1.29047600 | -1.32820500 |
| C  | 2.53522200  | 1.32220700  | 0.22482400  |
| C  | 5.38957900  | -1.92581000 | -2.83286500 |
| H  | 6.15864900  | -2.26581900 | -3.52064100 |
| C  | -0.28992700 | 3.74699700  | -0.61046600 |
| H  | -0.40320700 | 4.01652200  | 0.43315900  |
| C  | -5.91462500 | 1.30023900  | -0.74495200 |
| H  | -6.98567100 | 1.30847600  | -0.92448400 |
| C  | -4.04663700 | 1.05922800  | 0.76383100  |

|   |             |             |             |
|---|-------------|-------------|-------------|
| H | -3.67840200 | 0.86314200  | 1.76585800  |
| C | 1.92639000  | -2.90470900 | 3.30869500  |
| H | 1.31437500  | -3.75037800 | 3.60820900  |
| C | -0.62706000 | 2.46759300  | -1.05300600 |
| C | -0.86859700 | 2.24931700  | 4.45764600  |
| H | -0.74506400 | 2.49710700  | 5.50791100  |
| C | 2.46854000  | -1.19034500 | 1.68052200  |
| C | -5.02623800 | 1.51231200  | -1.79701900 |
| H | -5.40079000 | 1.68291800  | -2.80181200 |
| C | 3.41290700  | -1.05531600 | -1.05858600 |
| C | 0.12497100  | 3.06881200  | -3.27987500 |
| H | 0.29296800  | 2.79285700  | -4.31662300 |
| C | 3.71134300  | -1.34967900 | 3.75533300  |
| H | 4.49789000  | -0.97903000 | 4.40618800  |
| C | 2.93435600  | -2.43757500 | 4.14724300  |
| H | 3.11329900  | -2.91720400 | 5.10518400  |
| C | 4.04755600  | -2.03767800 | -3.17604700 |
| H | 3.75900800  | -2.46962700 | -4.12942900 |
| C | -0.38836700 | 1.04077200  | 3.96360700  |
| H | 0.11235000  | 0.33432100  | 4.61907400  |
| C | -0.39281400 | 2.12974900  | -2.39461800 |
| H | -0.61493500 | 1.12335300  | -2.74488500 |
| C | 3.29892400  | 3.37621800  | -0.81048200 |
| H | 3.67199300  | 3.89761200  | -1.68672100 |
| C | 2.31080900  | 2.03054600  | 1.40966800  |
| H | 1.92156200  | 1.52315300  | 2.28515200  |
| C | 0.43721300  | 4.35031300  | -2.83348700 |
| H | 0.84815100  | 5.08320100  | -3.52183200 |
| C | -5.41953300 | 1.07300400  | 0.53578500  |
| H | -6.10150100 | 0.89743000  | 1.36270200  |
| C | 2.59208000  | 3.39171200  | 1.48797100  |
| H | 2.41556000  | 3.91964000  | 2.42074900  |
| C | 3.09313400  | 4.06750100  | 0.38050800  |
| H | 3.31355800  | 5.12943000  | 0.44056500  |
| C | -1.81674600 | -1.74295300 | -1.66336800 |
| O | -2.07235200 | -1.27813200 | -2.75744200 |
| C | -2.78009800 | -2.39102500 | -0.73330800 |
| C | -2.21230900 | -3.45863500 | -0.02607300 |
| C | -4.09525400 | -2.01594500 | -0.50974400 |
| C | -2.95434600 | -4.15450600 | 0.91563200  |
| C | -4.84474100 | -2.69982100 | 0.44850500  |
| C | -4.27454700 | -3.75862800 | 1.14977100  |
| H | -2.51943300 | -4.99080100 | 1.45560100  |
| H | -5.87266100 | -2.40839800 | 0.63986900  |

|   |             |             |             |
|---|-------------|-------------|-------------|
| H | -4.86221300 | -4.29384900 | 1.89008300  |
| H | -4.52351100 | -1.20014800 | -1.08313700 |
| N | -0.88496900 | -3.76623600 | -0.39448800 |
| H | -0.61507000 | -4.74348500 | -0.43279900 |
| C | -0.34961800 | -2.95132800 | -1.39704400 |
| O | 0.45396600  | -3.35905000 | -2.20750900 |

### IntA33

|    |             |             |             |
|----|-------------|-------------|-------------|
| Pd | -0.07120200 | -0.94931000 | 0.49921600  |
| P  | -1.16551800 | 1.03565500  | 0.06719000  |
| P  | 2.26842200  | -0.50866300 | 0.17925800  |
| C  | 0.44867600  | 3.39251900  | -2.93983500 |
| H  | 0.79204400  | 4.41386100  | -3.07528600 |
| C  | 2.93172100  | -2.02854100 | 2.38808900  |
| H  | 1.98325700  | -2.51629300 | 2.17161700  |
| C  | 4.57735200  | -0.34130700 | 1.86651200  |
| H  | 4.91650000  | 0.49127600  | 1.25669900  |
| C  | -0.08117300 | 2.07751600  | 2.41832300  |
| H  | 0.37709100  | 1.09460800  | 2.50407300  |
| C  | 1.97114300  | -2.24341400 | -1.98964400 |
| H  | 0.90630400  | -2.19616900 | -1.77570100 |
| C  | -1.52354800 | 3.60033200  | 1.23278300  |
| H  | -2.19858500 | 3.80977000  | 0.40715000  |
| C  | -0.90078100 | 2.34936900  | 1.32099800  |
| C  | 4.25858900  | -1.67092000 | -1.46465400 |
| H  | 4.98097100  | -1.14819000 | -0.84335200 |
| C  | -1.29380100 | 4.57158400  | 2.20082600  |
| H  | -1.77702300 | 5.54071000  | 2.11877100  |
| C  | -3.55823400 | 1.61785000  | -1.38173700 |
| H  | -2.93230300 | 1.85344500  | -2.23657100 |
| C  | 3.18892300  | 1.50498800  | -1.59272300 |
| H  | 3.20044800  | 0.74119100  | -2.36315700 |
| C  | -2.97981700 | 1.19337600  | -0.18503000 |
| C  | 4.70081400  | -2.45172800 | -2.52530400 |
| H  | 5.76456100  | -2.53662200 | -2.72784300 |
| C  | 2.82698600  | 1.17501500  | -0.28483800 |
| C  | 3.77860600  | -3.12795200 | -3.32408600 |
| H  | 4.12484700  | -3.74057500 | -4.15174300 |
| C  | -0.04910300 | 2.99530100  | -1.70131200 |
| H  | -0.07484400 | 3.70874300  | -0.88459400 |
| C  | -5.75634400 | 1.47057600  | -0.39312500 |
| H  | -6.83412200 | 1.57847400  | -0.47329400 |
| C  | -3.80874500 | 0.88689800  | 0.90039200  |
| H  | -3.36993300 | 0.53373600  | 1.83063400  |
| C  | 3.71831900  | -2.46636600 | 3.44881900  |

|   |             |             |             |
|---|-------------|-------------|-------------|
| H | 3.38085700  | -3.29656800 | 4.06228900  |
| C | -0.47998000 | 1.68287500  | -1.50642700 |
| C | -0.45482600 | 4.29762500  | 3.28014200  |
| H | -0.28070100 | 5.05545700  | 4.03852800  |
| C | 3.35820100  | -0.96474100 | 1.58386100  |
| C | -4.94285200 | 1.75160700  | -1.48395400 |
| H | -5.38106200 | 2.08414400  | -2.42062100 |
| C | 2.88982900  | -1.55480600 | -1.19267400 |
| C | 0.11186500  | 1.16748300  | -3.79808100 |
| H | 0.17998100  | 0.44696200  | -4.60760200 |
| C | 5.35695100  | -0.77484200 | 2.93571500  |
| H | 6.30075900  | -0.28116900 | 3.14890900  |
| C | 4.93020800  | -1.83826600 | 3.72665600  |
| H | 5.54027300  | -2.17552800 | 4.55964600  |
| C | 2.41856800  | -3.02508900 | -3.05355600 |
| H | 1.69493100  | -3.55901600 | -3.66190000 |
| C | 0.14407100  | 3.04678500  | 3.39318900  |
| H | 0.78352500  | 2.82081300  | 4.24157300  |
| C | -0.38561400 | 0.76597000  | -2.56324000 |
| H | -0.70589000 | -0.26444800 | -2.42083400 |
| C | 3.52462100  | 2.81604100  | -1.92100300 |
| H | 3.79961400  | 3.05562000  | -2.94385700 |
| C | 2.79197500  | 2.18861100  | 0.68111300  |
| H | 2.51380900  | 1.95333700  | 1.70351000  |
| C | 0.52617900  | 2.48397300  | -3.99006900 |
| H | 0.91860900  | 2.79678800  | -4.95351100 |
| C | -5.18491600 | 1.03395600  | 0.80114300  |
| H | -5.81485300 | 0.79072800  | 1.65111800  |
| C | 3.12030000  | 3.49768700  | 0.35099400  |
| H | 3.08227200  | 4.26892500  | 1.11475400  |
| C | 3.49262300  | 3.81473800  | -0.95381500 |
| H | 3.75089300  | 4.83703000  | -1.21474300 |
| C | -2.08088000 | -2.51462000 | -0.76583700 |
| O | -1.59469800 | -2.49594900 | -1.88759500 |
| C | -3.48183200 | -2.35677600 | -0.35450300 |
| C | -3.56087400 | -2.59100000 | 1.02960900  |
| C | -4.62198000 | -2.08381700 | -1.10027700 |
| C | -4.78681800 | -2.54311000 | 1.68969600  |
| C | -5.84998100 | -2.04447200 | -0.45170500 |
| C | -5.92001400 | -2.27358300 | 0.92796200  |
| H | -4.85934200 | -2.72579000 | 2.75764300  |
| H | -6.75551900 | -1.82611300 | -1.00799400 |
| H | -6.88706500 | -2.23915600 | 1.42244900  |
| H | -4.53454200 | -1.90248000 | -2.16687600 |

|   |             |             |            |
|---|-------------|-------------|------------|
| N | -2.31243000 | -2.89551000 | 1.54190100 |
| H | -2.07643900 | -2.84653600 | 2.52020600 |
| C | -1.32888700 | -2.75542000 | 0.53810100 |
| O | -0.13076600 | -3.12660800 | 0.66022000 |

#### prodA4

|   |             |             |             |
|---|-------------|-------------|-------------|
| C | 1.18060100  | 0.89710800  | 0.00004000  |
| O | 1.74566600  | 1.96148100  | 0.00021700  |
| C | -0.25614300 | 0.57642400  | -0.00033500 |
| C | -0.38129100 | -0.82065800 | -0.00009300 |
| C | -1.37611700 | 1.39524100  | -0.00024000 |
| C | -1.62753700 | -1.42676400 | 0.00000100  |
| C | -2.63563800 | 0.79949000  | 0.00006900  |
| C | -2.74832000 | -0.59261000 | 0.00014100  |
| H | -1.73417500 | -2.50677500 | 0.00018100  |
| H | -3.53019600 | 1.41298200  | 0.00025000  |
| H | -3.73545000 | -1.04530800 | 0.00027600  |
| H | -1.25564100 | 2.47406300  | -0.00029800 |
| N | 0.88213500  | -1.42318900 | 0.00020800  |
| H | 1.04953800  | -2.41760900 | -0.00093000 |
| C | 1.90371300  | -0.49238900 | 0.00007700  |
| O | 3.08875500  | -0.70774000 | -0.00007900 |

#### TSA9'

|    |             |             |             |
|----|-------------|-------------|-------------|
| Pd | -0.12419800 | -0.84910900 | -0.67501700 |
| P  | 2.14013000  | -0.27055300 | -0.16409200 |
| P  | -1.31393200 | 1.09408900  | 0.10790300  |
| C  | 2.00624900  | 2.30411300  | 3.03922700  |
| H  | 1.88490300  | 3.37258500  | 3.19099500  |
| C  | -4.00380300 | 0.51942200  | -0.32867400 |
| H  | -3.89097300 | -0.16171100 | 0.50932200  |
| C  | -3.08534100 | 2.17829200  | -1.81875200 |
| H  | -2.26401100 | 2.81125400  | -2.14044200 |
| C  | 2.56210100  | 0.88029300  | -2.64051500 |
| H  | 1.77784300  | 0.19400300  | -2.95260200 |
| C  | -1.15697700 | 0.01937300  | 2.65579900  |
| H  | -0.43551400 | -0.66433400 | 2.22142900  |
| C  | 3.95426200  | 1.80008700  | -0.90059300 |
| H  | 4.27819400  | 1.82651700  | 0.13528200  |
| C  | 2.94706900  | 0.91541200  | -1.29637800 |
| C  | -2.72505600 | 1.84624700  | 2.43795100  |
| H  | -3.23106400 | 2.58612100  | 1.82306100  |
| C  | 4.54476500  | 2.65295800  | -1.82891900 |
| H  | 5.31990000  | 3.34242800  | -1.50834900 |
| C  | 2.83390000  | -2.92684300 | 0.34284700  |
| H  | 1.80813900  | -3.03269800 | 0.69477000  |

|   |             |             |             |              |             |             |             |
|---|-------------|-------------|-------------|--------------|-------------|-------------|-------------|
| C | -0.45483100 | 3.71754900  | 0.83134600  | H            | 1.56010000  | 4.13991100  | -2.45136600 |
| H | -0.98261300 | 3.58933000  | 1.77023100  | C            | 1.00519200  | 5.03848400  | -0.56971700 |
| C | 3.29226100  | -1.69831300 | -0.14950600 | H            | 1.58915400  | 5.93970000  | -0.73133100 |
| C | -3.05309400 | 1.72135400  | 3.78129700  | C            | -1.84124800 | -1.90355600 | -1.33774400 |
| H | -3.79931600 | 2.37867900  | 4.21804500  | C            | -2.70646800 | -2.56338400 | -0.43109800 |
| C | -0.47051000 | 2.70204300  | -0.12826900 | C            | -2.28927000 | -1.58261000 | -2.62848100 |
| C | -2.44266600 | 0.73679800  | 4.56143900  | C            | -4.00151500 | -2.88142700 | -0.90463000 |
| H | -2.71920800 | 0.62802700  | 5.60623900  | C            | -3.57168100 | -1.87640500 | -3.05673100 |
| C | 2.10312600  | 1.80724800  | 1.74330900  | C            | -4.42471800 | -2.54376900 | -2.17520900 |
| H | 2.05627800  | 2.49778700  | 0.90815500  | H            | -4.68093800 | -3.40292600 | -0.23413100 |
| C | 5.00886300  | -3.90124900 | -0.05805000 | H            | -3.89893300 | -1.60375100 | -4.05427400 |
| H | 5.67539800  | -4.75827100 | -0.02587200 | H            | -5.43172800 | -2.80841600 | -2.48567600 |
| C | 4.61212600  | -1.58382600 | -0.59948700 | H            | -1.59850200 | -1.09028600 | -3.30804800 |
| H | 4.98113700  | -0.64279800 | -0.99401000 | N            | -2.44418000 | -2.86148800 | 0.88595500  |
| C | -5.21796700 | 0.58987500  | -1.00061200 | H            | -3.23050500 | -3.19884900 | 1.42209700  |
| H | -6.04208400 | -0.04076200 | -0.68195700 | C            | -1.22602800 | -2.97658400 | 1.64938100  |
| C | 2.24895900  | 0.43397200  | 1.52222500  | O            | -1.39432000 | -3.26653700 | 2.83199000  |
| C | 4.14914400  | 2.61726200  | -3.16358100 | O            | -0.14908300 | -2.75424800 | 1.02064300  |
| H | 4.61347000  | 3.28150400  | -3.88649900 | C            | 0.02156700  | -2.58358900 | -1.50165300 |
| C | -2.92708800 | 1.31476900  | -0.73261000 | O            | 0.32703500  | -3.60402100 | -1.93598600 |
| C | 3.69733400  | -4.01811100 | 0.39188700  | <b>subB</b>  |             |             |             |
| H | 3.33223400  | -4.96495100 | 0.77768800  | C            | -1.04488900 | -1.68552700 | 0.22240300  |
| C | -1.76075200 | 1.00019300  | 1.86997900  | C            | -0.49006600 | -0.43347500 | -0.02370300 |
| C | 2.20107500  | 0.07016300  | 3.91319300  | C            | -1.28973400 | 0.68609200  | -0.27281300 |
| H | 2.22882800  | -0.61531800 | 4.75445700  | C            | -2.67514500 | 0.49728100  | -0.26422100 |
| C | -4.30319000 | 2.24537900  | -2.48996200 | C            | -3.24772800 | -0.74536000 | -0.01662000 |
| H | -4.41623900 | 2.92451700  | -3.32997000 | C            | -2.42836500 | -1.84053100 | 0.22831200  |
| C | -5.37094400 | 1.45114500  | -2.08366700 | H            | -0.40310400 | -2.53961600 | 0.40785200  |
| H | -6.31987400 | 1.50301100  | -2.60930800 | H            | -3.31555600 | 1.35430800  | -0.45961400 |
| C | -1.50438700 | -0.11849700 | 3.99766300  | H            | -4.32770900 | -0.85581100 | -0.01777300 |
| H | -1.05763300 | -0.92139000 | 4.57322000  | H            | -2.85675800 | -2.81924400 | 0.42138100  |
| C | 3.16098800  | 1.72330300  | -3.57070100 | C            | -0.74389000 | 2.07717300  | -0.50242100 |
| H | 2.85344700  | 1.68501900  | -4.61136000 | H            | 0.12947100  | 2.02907900  | -1.16137400 |
| C | 2.29618400  | -0.43249800 | 2.62004200  | H            | -1.51182900 | 2.66361100  | -1.03482300 |
| H | 2.37659200  | -1.50396200 | 2.47138300  | N            | -0.31511000 | 2.66211300  | 0.76437500  |
| C | 0.27930600  | 4.87889700  | 0.60906400  | H            | 0.13094200  | 3.55973600  | 0.60260600  |
| H | 0.29385200  | 5.65734100  | 1.36635000  | H            | -1.12125200 | 2.82678500  | 1.36014300  |
| C | 0.24907200  | 2.87765000  | -1.31369500 | I            | 1.64151800  | -0.30542600 | -0.03197500 |
| H | 0.25902800  | 2.08447500  | -2.05549400 | <b>IntB1</b> |             |             |             |
| C | 2.05232600  | 1.43787800  | 4.12679000  | C            | 2.76047800  | 1.35811300  | -0.76379700 |
| H | 1.96581600  | 1.82552700  | 5.13733700  | C            | 2.71176200  | 2.74622000  | -0.63665400 |
| C | 5.46381900  | -2.68286700 | -0.55551500 | C            | 2.80652000  | 0.58916700  | 0.43578200  |
| H | 6.48476200  | -2.58507700 | -0.91283600 | C            | 2.69206600  | 3.38224800  | 0.60581700  |
| C | 0.98458000  | 4.03713400  | -1.53665600 | H            | 2.68424800  | 3.34478300  | -1.54420800 |

|    |             |             |             |
|----|-------------|-------------|-------------|
| C  | 2.76278700  | 1.22809000  | 1.69525200  |
| C  | 2.69879800  | 2.62436000  | 1.76681100  |
| H  | 2.86669800  | 0.64240400  | 2.60176900  |
| I  | 3.45011600  | -1.49477300 | 0.41037600  |
| H  | 2.66100900  | 4.46596400  | 0.65823500  |
| H  | 2.67489500  | 3.10297900  | 2.74099300  |
| Pd | 0.75719500  | 0.12397100  | 0.58262900  |
| P  | -1.49256500 | -0.05173300 | 0.18002300  |
| C  | -2.75288300 | 0.29451000  | 1.46741400  |
| C  | -4.00769500 | 0.84768700  | 1.19360100  |
| C  | -4.92418000 | 1.05510700  | 2.22092200  |
| C  | -4.59774000 | 0.70928700  | 3.52994300  |
| C  | -3.34825100 | 0.16268300  | 3.81194200  |
| C  | -2.42842600 | -0.03598000 | 2.78693000  |
| C  | -2.01464900 | -1.67425600 | -0.50705100 |
| C  | -3.25332900 | -2.26795200 | -0.25271900 |
| C  | -3.57677000 | -3.49377300 | -0.83151600 |
| C  | -2.66875700 | -4.13184300 | -1.67112500 |
| C  | -1.43041600 | -3.54547500 | -1.92682500 |
| C  | -1.09956800 | -2.32736400 | -1.34333500 |
| C  | -1.94688700 | 1.10521600  | -1.18185000 |
| C  | -2.87856800 | 0.79211000  | -2.17631500 |
| C  | -3.16414500 | 1.70462700  | -3.18952000 |
| C  | -2.52149500 | 2.93917400  | -3.22182800 |
| C  | -1.58836300 | 3.25910900  | -2.23781100 |
| C  | -1.29962200 | 2.34671700  | -1.22747800 |
| H  | -4.26954200 | 1.12307800  | 0.17594400  |
| H  | -5.89442000 | 1.48954800  | 1.99805300  |
| H  | -5.31376400 | 0.87272600  | 4.33014700  |
| H  | -3.08530900 | -0.10017300 | 4.83230300  |
| H  | -3.96764300 | -1.77764900 | 0.40230400  |
| H  | -4.54018500 | -3.95007200 | -0.62276900 |
| H  | -2.92203200 | -5.08799700 | -2.12011300 |
| H  | -0.71472800 | -4.04431300 | -2.57395500 |
| H  | -3.37686700 | -0.17316000 | -2.16620700 |
| H  | -3.88741000 | 1.44683600  | -3.95780600 |
| H  | -2.74229700 | 3.64772700  | -4.01489500 |
| H  | -1.07853000 | 4.21802500  | -2.25991500 |
| H  | -0.12665500 | -1.87414700 | -1.53023200 |
| H  | -0.55348000 | 2.58556900  | -0.47242500 |
| H  | -1.44354700 | -0.44214400 | 3.00481700  |
| C  | 2.77591200  | 0.74151600  | -2.14354700 |
| H  | 3.02441100  | 1.53724700  | -2.86421300 |
| H  | 3.57686600  | -0.00394400 | -2.20526200 |

|   |            |             |             |
|---|------------|-------------|-------------|
| N | 1.51328000 | 0.06086800  | -2.44000900 |
| H | 0.74935500 | 0.73276700  | -2.42849300 |
| H | 1.54783500 | -0.34159200 | -3.37344000 |

**TSB1**

|    |             |             |             |
|----|-------------|-------------|-------------|
| C  | 3.14630600  | -1.28881300 | 0.70433400  |
| C  | 3.60117000  | -2.58288800 | 0.46707900  |
| C  | 2.85196800  | -0.47721800 | -0.42272600 |
| C  | 3.77074100  | -3.08109500 | -0.82603400 |
| H  | 3.81833100  | -3.22199400 | 1.32012500  |
| C  | 3.02731100  | -0.97007500 | -1.72782300 |
| C  | 3.47293700  | -2.27918100 | -1.91893400 |
| H  | 2.86003300  | -0.31866500 | -2.57809600 |
| I  | 2.93798400  | 1.82723000  | -0.24479700 |
| H  | 4.13051200  | -4.09489300 | -0.97171800 |
| H  | 3.60076300  | -2.65597900 | -2.92943300 |
| Pd | 0.83634200  | -0.10819100 | -0.36164800 |
| P  | -1.47091200 | -0.03351900 | -0.14130500 |
| C  | -2.56893100 | -0.26228900 | -1.59208700 |
| C  | -3.81265500 | -0.89814100 | -1.52787500 |
| C  | -4.60376600 | -1.01145600 | -2.66805400 |
| C  | -4.16165900 | -0.48868000 | -3.88075900 |
| C  | -2.92177100 | 0.14159600  | -3.95407600 |
| C  | -2.12663600 | 0.24723500  | -2.81723500 |
| C  | -2.11568400 | 1.49400700  | 0.64783100  |
| C  | -3.38143200 | 2.02796500  | 0.39138000  |
| C  | -3.80518400 | 3.17864500  | 1.05236000  |
| C  | -2.97053200 | 3.80232100  | 1.97560400  |
| C  | -1.70568100 | 3.27768100  | 2.23271000  |
| C  | -1.27671900 | 2.13387300  | 1.56787200  |
| C  | -2.02715600 | -1.34962800 | 1.01966100  |
| C  | -3.02658300 | -1.16437300 | 1.97871500  |
| C  | -3.38546400 | -2.20442900 | 2.83388900  |
| C  | -2.75160800 | -3.43997100 | 2.73960000  |
| C  | -1.75244700 | -3.63410900 | 1.78767300  |
| C  | -1.38971100 | -2.59406600 | 0.93798700  |
| H  | -4.16287300 | -1.31140600 | -0.58614700 |
| H  | -5.56638200 | -1.51105200 | -2.60870600 |
| H  | -4.77969000 | -0.57904500 | -4.76933000 |
| H  | -2.56865800 | 0.54289900  | -4.89936600 |
| H  | -4.03724800 | 1.54983100  | -0.33052800 |
| H  | -4.78846600 | 3.58933100  | 0.84193400  |
| H  | -3.30176800 | 4.70105400  | 2.48782400  |
| H  | -1.04632700 | 3.76774900  | 2.94309800  |
| H  | -3.52271400 | -0.20201400 | 2.06505300  |

|   |             |             |             |
|---|-------------|-------------|-------------|
| H | -4.16132900 | -2.04587000 | 3.57732700  |
| H | -3.03153000 | -4.24853700 | 3.40857000  |
| H | -1.25125800 | -4.59462200 | 1.71015700  |
| H | -0.28241300 | 1.73122800  | 1.74997400  |
| H | -0.59699100 | -2.73917300 | 0.20667100  |
| H | -1.14898800 | 0.72016800  | -2.87407700 |
| C | 2.92469000  | -0.80399400 | 2.11524800  |
| H | 3.38932300  | -1.51964200 | 2.81149500  |
| H | 3.43190500  | 0.15764400  | 2.25373900  |
| N | 1.49666800  | -0.58411900 | 2.36627300  |
| H | 0.99375000  | -1.46771800 | 2.35903700  |
| H | 1.35508800  | -0.16155600 | 3.28005100  |

**IntB2**

|    |             |             |             |
|----|-------------|-------------|-------------|
| Pd | -0.01305000 | -0.13556200 | -0.19679300 |
| P  | -2.35789200 | -0.06527700 | 0.09021500  |
| P  | 2.36157700  | -0.04417900 | 0.10284400  |
| C  | -4.86497800 | -2.73895400 | 1.97551400  |
| H  | -5.88679900 | -3.09098600 | 1.86974200  |
| C  | 2.88758000  | -1.19849500 | -2.39505400 |
| H  | 1.87995000  | -1.59384600 | -2.31333100 |
| C  | 4.70872500  | 0.08953100  | -1.47381400 |
| H  | 5.12033100  | 0.71514400  | -0.68758300 |
| C  | -2.69816200 | -0.92445900 | -2.53593500 |
| H  | -1.71287300 | -1.36078300 | -2.40053500 |
| C  | 3.07379100  | 2.63472400  | -0.23646000 |
| H  | 2.77531200  | 2.48240000  | -1.26908800 |
| C  | -4.56715800 | 0.32362900  | -1.65561700 |
| H  | -5.03682000 | 0.87895700  | -0.84915800 |
| C  | -3.28874900 | -0.21964800 | -1.48138700 |
| C  | 3.40216600  | 1.79124900  | 1.99520100  |
| H  | 3.38289900  | 0.97680100  | 2.71237800  |
| C  | -5.23840700 | 0.17080400  | -2.86512200 |
| H  | -6.22816600 | 0.60017100  | -2.98904300 |
| C  | -3.24148000 | 1.53820200  | 2.22698400  |
| H  | -3.13991400 | 0.64862200  | 2.84072100  |
| C  | 2.08314400  | -1.42522200 | 2.48808800  |
| H  | 1.10256100  | -0.95668600 | 2.50206200  |
| C  | -3.01742500 | 1.47052200  | 0.85000500  |
| C  | 3.79338700  | 3.06267700  | 2.41178700  |
| H  | 4.07622200  | 3.22319400  | 3.44807600  |
| C  | 2.93041800  | -1.20414800 | 1.39808200  |
| C  | 3.82239700  | 4.11809500  | 1.50801100  |
| H  | 4.12104500  | 5.10952000  | 1.83575900  |
| C  | -4.35882200 | -1.81092800 | 1.07071900  |

|   |             |             |             |
|---|-------------|-------------|-------------|
| H | -4.99109600 | -1.44896600 | 0.26603700  |
| C | -3.72936900 | 3.89567200  | 2.05697500  |
| H | -3.99884100 | 4.83746900  | 2.52589700  |
| C | -3.16288400 | 2.63229300  | 0.08388700  |
| H | -2.98458700 | 2.60537900  | -0.98587000 |
| C | 3.66847100  | -1.49681200 | -3.50866000 |
| H | 3.25868800  | -2.12144700 | -4.29676100 |
| C | -3.04213800 | -1.36074500 | 1.18871700  |
| C | -4.64219000 | -0.52873500 | -3.91115400 |
| H | -5.16657000 | -0.64659100 | -4.85496800 |
| C | 3.40085600  | -0.40175900 | -1.36661700 |
| C | -3.59494500 | 2.74483500  | 2.82579000  |
| H | -3.76567500 | 2.78088900  | 3.89775200  |
| C | 3.03423800  | 1.56692700  | 0.66823100  |
| C | -2.75010700 | -2.77328300 | 3.13064100  |
| H | -2.11364500 | -3.15716600 | 3.92198600  |
| C | 5.48591900  | -0.21131900 | -2.58769100 |
| H | 6.49804400  | 0.17605800  | -2.65794600 |
| C | 4.96624100  | -1.00416600 | -3.60826900 |
| H | 5.57312400  | -1.23740500 | -4.47836700 |
| C | 3.46444900  | 3.89938100  | 0.17862300  |
| H | 3.47303000  | 4.71927400  | -0.53276700 |
| C | -3.37410900 | -1.07836700 | -3.74264000 |
| H | -2.90807800 | -1.63425300 | -4.55088800 |
| C | -2.23936300 | -1.85499400 | 2.21980900  |
| H | -1.20360600 | -1.53775700 | 2.28825700  |
| C | 2.48105300  | -2.24870300 | 3.53444700  |
| H | 1.81333500  | -2.41595600 | 4.37424000  |
| C | 4.17522200  | -1.83366000 | 1.36087200  |
| H | 4.83766100  | -1.68557800 | 0.51386800  |
| C | -4.06374300 | -3.21745400 | 3.00870300  |
| H | -4.45994900 | -3.94415900 | 3.71188600  |
| C | -3.51570100 | 3.83468900  | 0.68205000  |
| H | -3.60867300 | 4.72835100  | 0.07281200  |
| C | 4.56699200  | -2.66984300 | 2.40290500  |
| H | 5.53250600  | -3.16499300 | 2.36027000  |
| C | 3.72441600  | -2.87507600 | 3.49130800  |
| H | 4.03177900  | -3.53022900 | 4.30109000  |
| C | -0.05421300 | 1.88122200  | -0.09382900 |
| C | -0.18422100 | 2.62922900  | -1.27400800 |
| C | 0.05844800  | 2.55314100  | 1.12523200  |
| C | -0.16004200 | 4.02637600  | -1.20322900 |
| C | 0.06171100  | 3.94266100  | 1.18669800  |
| H | 0.14839300  | 1.98423500  | 2.04660800  |

|   |             |             |             |
|---|-------------|-------------|-------------|
| C | -0.03988800 | 4.68601800  | 0.01447100  |
| H | -0.24689800 | 4.60486100  | -2.12175000 |
| H | 0.15315800  | 4.44116000  | 2.14739100  |
| H | -0.02479800 | 5.77177700  | 0.04729000  |
| I | 0.03186000  | -2.91967100 | -0.48470800 |
| C | -0.44447500 | 1.97247300  | -2.61535500 |
| H | -1.51166200 | 1.72001100  | -2.68300300 |
| H | -0.24631400 | 2.70046900  | -3.41886400 |
| N | 0.28518900  | 0.71930000  | -2.77488000 |
| H | -0.06156300 | 0.19683900  | -3.57286000 |
| H | 1.27627200  | 0.88489300  | -2.92455500 |

### TSB2

|    |             |             |             |
|----|-------------|-------------|-------------|
| Pd | -0.30118400 | -1.22146400 | -0.51917100 |
| P  | 0.55725500  | 0.98004800  | 0.00270500  |
| C  | 0.80849400  | 0.08184900  | 2.60744200  |
| H  | 1.34930900  | -0.73922900 | 2.14098300  |
| C  | -0.36994600 | 2.18285800  | 2.42258400  |
| H  | -0.74775000 | 3.00497600  | 1.82270100  |
| C  | 2.94930400  | 0.87993600  | -1.40068100 |
| H  | 2.41300600  | 0.21253200  | -2.06831200 |
| C  | 3.02512700  | 2.20052200  | 0.62191300  |
| H  | 2.54186800  | 2.58510400  | 1.51562500  |
| C  | 0.35415200  | 3.46574600  | -1.35212200 |
| H  | 1.43728700  | 3.45598600  | -1.41700000 |
| C  | 4.35092600  | 2.52746300  | 0.35673700  |
| H  | 4.89818500  | 3.16329700  | 1.04623100  |
| C  | -0.31994100 | 2.42308500  | -0.71016900 |
| C  | 4.97424900  | 2.03708700  | -0.78869300 |
| H  | 6.01078500  | 2.28954200  | -0.99209300 |
| C  | 0.59487600  | 0.08316100  | 3.98117300  |
| H  | 0.98216800  | -0.73175900 | 4.58580700  |
| C  | 0.31975300  | 1.13174300  | 1.81570700  |
| C  | 2.31712300  | 1.37589700  | -0.25755000 |
| C  | -0.58989000 | 2.17460300  | 3.79968900  |
| H  | -1.13363400 | 2.99357100  | 4.26127400  |
| C  | -0.11417900 | 1.12516100  | 4.57907700  |
| H  | -0.28896500 | 1.12009400  | 5.65086500  |
| C  | 4.27307600  | 1.21532300  | -1.66679600 |
| H  | 4.76026500  | 0.81839300  | -2.55179400 |
| C  | -0.35893900 | 4.52127600  | -1.91598900 |
| H  | 0.17700400  | 5.32316300  | -2.41492600 |
| C  | -1.71802300 | 2.45743300  | -0.64449100 |
| H  | -2.25877900 | 1.65792200  | -0.14990500 |
| C  | -2.42643100 | 3.51616000  | -1.19956300 |

|   |             |             |             |
|---|-------------|-------------|-------------|
| H | -3.51060600 | 3.52282000  | -1.13801800 |
| C | -1.74799900 | 4.55033800  | -1.84064600 |
| H | -2.30056700 | 5.37455900  | -2.28199200 |
| C | -2.45137400 | -0.97295000 | -0.67442000 |
| C | -3.17935000 | -0.66289500 | 0.48673500  |
| C | -2.92259500 | -0.57291800 | -1.93048000 |
| C | -4.37116000 | 0.05191100  | 0.34910500  |
| C | -4.09846500 | 0.15876500  | -2.04642900 |
| H | -2.36219500 | -0.84161500 | -2.82107600 |
| C | -4.82565700 | 0.46711700  | -0.89964800 |
| H | -4.94767700 | 0.29604600  | 1.23870300  |
| H | -4.44880900 | 0.47627900  | -3.02342000 |
| H | -5.75502400 | 1.02395000  | -0.97668100 |
| I | 1.99887800  | -2.63699000 | -0.44168800 |
| C | -1.56200000 | -2.61329500 | -0.73744400 |
| O | -2.08917100 | -3.63311100 | -0.88117900 |
| C | -2.67847300 | -0.99425300 | 1.88320800  |
| H | -2.07704800 | -0.14483100 | 2.22820500  |
| H | -3.54322300 | -1.05631500 | 2.56118600  |
| N | -1.83716500 | -2.17473100 | 1.91258100  |
| H | -1.10229700 | -2.10664900 | 2.60516300  |
| H | -2.36066000 | -3.02948700 | 2.06111200  |

### IntB3

|    |             |             |             |
|----|-------------|-------------|-------------|
| Pd | 0.24636000  | -0.57522000 | -0.56104700 |
| P  | 1.11343200  | 1.55041800  | -0.09068000 |
| P  | -2.09132500 | -0.21861100 | 0.15228000  |
| C  | -0.20284900 | 3.77631000  | 3.14801000  |
| H  | -0.61327800 | 4.76300500  | 3.33867200  |
| C  | -2.94782300 | -0.65241400 | -2.47753100 |
| H  | -1.90344500 | -0.86159400 | -2.68857500 |
| C  | -4.70135200 | -0.10905200 | -0.90951900 |
| H  | -5.01914200 | 0.14301600  | 0.09868800  |
| C  | -0.36078900 | 2.41022700  | -2.29191000 |
| H  | -0.69120700 | 1.37625800  | -2.34281200 |
| C  | -1.63974100 | -1.63352100 | 2.49006700  |
| H  | -0.85031800 | -0.90279700 | 2.64370800  |
| C  | 0.99697300  | 4.12005000  | -1.26515400 |
| H  | 1.73451700  | 4.42134300  | -0.52630800 |
| C  | 0.53544300  | 2.79763400  | -1.29308500 |
| C  | -3.46155900 | -2.49429000 | 1.16903200  |
| H  | -4.09234800 | -2.45322900 | 0.28738800  |
| C  | 0.53005800  | 5.04551100  | -2.19133400 |
| H  | 0.88912600  | 6.06968600  | -2.15863200 |
| C  | 3.71785600  | 1.55200700  | 1.01415600  |



|   |             |             |             |              |             |             |             |
|---|-------------|-------------|-------------|--------------|-------------|-------------|-------------|
| H | 3.25123600  | 1.35433100  | 1.97330500  | C            | -3.22156500 | 3.68036200  | 0.70114600  |
| C | -2.93905000 | 1.43981000  | 2.32892300  | H            | -3.33072000 | 4.54736700  | 0.05618400  |
| H | -2.84337900 | 0.57476700  | 2.97625800  | C            | -3.50991700 | 3.77253300  | 2.06100400  |
| C | 2.93614900  | 1.76706500  | -0.12388800 | H            | -3.84659600 | 4.71361300  | 2.48620600  |
| C | -3.62460500 | -3.53161800 | 2.08474100  | I            | -0.31506400 | -3.16379800 | -1.33151800 |
| H | -4.39039800 | -4.28160700 | 1.91210500  | C            | 2.07689000  | -1.00744900 | -1.29560000 |
| C | -2.65425200 | 1.33644300  | 0.96655400  | O            | 2.23052800  | -0.72567400 | -2.45865400 |
| C | -2.80547500 | -3.61717000 | 3.20522400  | C            | 3.22274800  | -1.53551700 | -0.46306600 |
| H | -2.93322500 | -4.43010100 | 3.91363700  | C            | 3.15820500  | -2.02885100 | 0.85261000  |
| C | 0.11833700  | 3.41080800  | 1.84377200  | C            | 4.46875700  | -1.45801400 | -1.10579300 |
| H | -0.05981300 | 4.11300200  | 1.03749100  | C            | 4.34710700  | -2.43948900 | 1.46585600  |
| C | 5.72819100  | 1.83739100  | -0.28710000 | C            | 5.63598000  | -1.84922900 | -0.47365800 |
| H | 6.81192300  | 1.85781700  | -0.35132900 | C            | 5.57385900  | -2.34662700 | 0.82588600  |
| C | 3.56860100  | 2.01001700  | -1.34815200 | H            | 4.28571600  | -2.85515000 | 2.46764200  |
| H | 2.97944000  | 2.14971800  | -2.24873600 | H            | 6.58783700  | -1.76823400 | -0.99020000 |
| C | -3.88932200 | -0.71306400 | -3.50298100 | H            | 6.47791300  | -2.66556300 | 1.33700500  |
| H | -3.56735900 | -0.95275900 | -4.51167100 | H            | 4.49067800  | -1.06953000 | -2.11747900 |
| C | 0.62900600  | 2.14026900  | 1.57570200  | C            | 1.90076400  | -2.20949300 | 1.67914600  |
| C | -0.38710800 | 4.65592600  | -3.16678800 | H            | 1.05595800  | -1.67768200 | 1.21669700  |
| H | -0.74729900 | 5.37960700  | -3.89193900 | H            | 2.06999700  | -1.74555800 | 2.66188000  |
| C | -3.34692100 | -0.35274100 | -1.17323100 | N            | 1.63653400  | -3.62737100 | 1.90232900  |
| C | 5.10588600  | 1.58562400  | 0.93127700  | H            | 0.75034200  | -3.71380400 | 2.39725700  |
| H | 5.69976500  | 1.40637600  | 1.82202700  | H            | 1.47330700  | -4.06062000 | 0.99412300  |
| C | -2.47091600 | -1.53323500 | 1.36730800  |              |             |             |             |
| C | 0.47358300  | 1.60678800  | 3.93795700  | <b>IntB4</b> |             |             |             |
| H | 0.60824000  | 0.89436000  | 4.74651700  | Pd           | 0.32262900  | 0.63761200  | 0.45884600  |
| C | -5.63950500 | -0.17800800 | -1.93200600 | P            | 1.20170600  | -1.47479300 | 0.06166100  |
| H | -6.68757400 | 0.00798000  | -1.71699600 | P            | -2.11503800 | 0.32765100  | -0.04206700 |
| C | -5.23299500 | -0.47893600 | -3.23167600 | C            | 0.15940800  | -4.06005000 | -2.98147900 |
| H | -5.96649800 | -0.52993500 | -4.03111200 | H            | 0.12341000  | -5.13273900 | -3.14777000 |
| C | -1.81215600 | -2.66089300 | 3.40986400  | C            | -2.53511100 | 0.75688500  | 2.66778800  |
| H | -1.16523500 | -2.72090300 | 4.28072500  | H            | -1.73893300 | 1.48901700  | 2.54905000  |
| C | -0.82444100 | 3.33644900  | -3.22289000 | C            | -4.02240400 | -0.88510200 | 1.70058700  |
| H | -1.52205400 | 3.02068900  | -3.99241400 | H            | -4.38645800 | -1.44289000 | 0.84389700  |
| C | 0.78558500  | 1.23778400  | 2.63435000  | C            | -0.35513500 | -2.31587100 | 2.21892500  |
| H | 1.15343700  | 0.23635100  | 2.43366800  | H            | -0.82601500 | -1.34280900 | 2.13503400  |
| C | -3.36540600 | 2.65108300  | 2.86997400  | C            | -2.14903000 | 2.53826700  | -1.71109400 |
| H | -3.58557700 | 2.71232700  | 3.93168700  | H            | -1.21488500 | 2.13458800  | -2.09317500 |
| C | -2.79876600 | 2.47290400  | 0.16000200  | C            | 1.34628300  | -3.88621000 | 1.54692000  |
| H | -2.59725700 | 2.41294700  | -0.90484800 | H            | 2.20680400  | -4.14298800 | 0.93540800  |
| C | -0.01859100 | 2.88260300  | 4.19781200  | C            | 0.70363400  | -2.65394700 | 1.37183400  |
| H | -0.27152200 | 3.17377300  | 5.21284200  | C            | -4.01327000 | 2.42654900  | -0.17741600 |
| C | 4.95611300  | 2.05111700  | -1.42544900 | H            | -4.54253500 | 1.92644900  | 0.62804900  |
| H | 5.43319500  | 2.23939400  | -2.38246600 | C            | 0.90514300  | -4.77531500 | 2.52087700  |
|   |             |             |             | H            | 1.41060000  | -5.72796600 | 2.64809600  |

|   |             |             |             |              |             |             |             |
|---|-------------|-------------|-------------|--------------|-------------|-------------|-------------|
| C | 3.68662800  | -1.88926600 | -1.22267200 | H            | 5.72203200  | -1.57880800 | 2.05297300  |
| H | 3.12221000  | -1.97441600 | -2.14606700 | C            | -3.00411900 | -3.29922400 | -1.72270100 |
| C | -3.52131000 | -0.62876200 | -2.31332200 | H            | -2.78971300 | -4.33775300 | -1.49063600 |
| H | -3.73096800 | 0.40875700  | -2.55183500 | C            | -3.71529600 | -2.96855300 | -2.87452800 |
| C | 3.02190100  | -1.69326700 | -0.00947800 | H            | -4.06488100 | -3.75084800 | -3.54190200 |
| C | -4.51254400 | 3.61515200  | -0.70169700 | C            | 2.08439200  | 1.17871000  | 1.24443600  |
| H | -5.43121300 | 4.03569200  | -0.30330500 | O            | 2.22642100  | 0.89060800  | 2.41024100  |
| C | -2.80328000 | -0.95112900 | -1.15995500 | C            | 3.08035300  | 2.07314700  | 0.54837800  |
| C | -3.83217600 | 4.26580300  | -1.72883800 | C            | 3.81686200  | 2.88839100  | 1.42001600  |
| H | -4.21763100 | 5.19874400  | -2.12971300 | C            | 4.28260000  | 3.05067200  | -1.29098900 |
| C | 0.59119900  | -3.56629300 | -1.75630900 | C            | 4.75890700  | 3.78778400  | 0.94571200  |
| H | 0.87869900  | -4.26171900 | -0.97453400 | C            | 4.99495800  | 3.86789200  | -0.42360400 |
| C | 5.81229900  | -1.85624900 | -0.08194900 | H            | 4.47746900  | 3.10664900  | -2.36001200 |
| H | 6.89635400  | -1.91346500 | -0.11039000 | H            | 5.30729600  | 4.41884700  | 1.63868000  |
| C | 3.76805500  | -1.58709400 | 1.17082700  | H            | 5.73482200  | 4.56068100  | -0.81454100 |
| H | 3.26612400  | -1.42282700 | 2.11884900  | H            | 3.62492100  | 2.80057700  | 2.48381900  |
| C | -3.10909000 | 0.53418700  | 3.91504300  | N            | 1.38112900  | 2.00756600  | -2.43934800 |
| H | -2.74980500 | 1.09132000  | 4.77512400  | H            | 0.94219300  | 2.55202400  | -1.68768900 |
| C | 0.63158300  | -2.18758000 | -1.52552500 | H            | 1.67874300  | 2.70400500  | -3.11918900 |
| C | -0.17510900 | -4.44222800 | 3.33694000  | O            | -0.36036300 | 2.49214500  | 1.24227300  |
| H | -0.51624600 | -5.13959300 | 4.09639200  | C            | -0.26321900 | 3.61474000  | 0.61618600  |
| C | -2.98578300 | 0.03975200  | 1.54931700  | O            | 0.36049400  | 3.81267000  | -0.42896400 |
| C | 5.07653400  | -1.96745300 | -1.25698400 | C            | -1.06621100 | 4.73995200  | 1.24794500  |
| H | 5.58191700  | -2.11541800 | -2.20665300 | H            | -1.03087200 | 4.68609500  | 2.33887400  |
| C | -2.82712900 | 1.88339700  | -0.67845800 | H            | -0.70371200 | 5.70898800  | 0.90028300  |
| C | -0.18875800 | -1.80890800 | -3.76773800 | H            | -2.11103000 | 4.62203800  | 0.93579900  |
| H | -0.49841400 | -1.11723500 | -4.54469100 | C            | 3.31249800  | 2.15267600  | -0.83747200 |
| C | -4.58972100 | -1.10568600 | 2.95387300  | C            | 2.56725900  | 1.34862600  | -1.88622100 |
| H | -5.39213600 | -1.83005900 | 3.05959300  | H            | 3.25496600  | 1.11263700  | -2.70647800 |
| C | -4.13143700 | -0.40141700 | 4.06336000  | H            | 2.26751900  | 0.39064400  | -1.46788900 |
| H | -4.57221000 | -0.57750400 | 5.04044100  |              |             |             |             |
| C | -2.65282300 | 3.72508000  | -2.23360900 | <b>IntB5</b> |             |             |             |
| H | -2.10739200 | 4.23702600  | -3.01978800 | Pd           | 0.47778500  | -0.91214900 | -0.21968800 |
| C | -0.80052000 | -3.20835300 | 3.19004000  | P            | 1.17704800  | 1.29318300  | 0.12014800  |
| H | -1.62959000 | -2.92475700 | 3.83117500  | P            | -1.99086800 | -0.59495000 | 0.05487500  |
| C | 0.24502700  | -1.30894300 | -2.54304600 | C            | 0.86739700  | 3.75388200  | 3.41731100  |
| H | 0.28049300  | -0.23059000 | -2.39258800 | H            | 1.10359500  | 4.78119500  | 3.67817200  |
| C | -3.97108100 | -1.63387700 | -3.16707200 | C            | -1.91571700 | -1.23732200 | -2.65428900 |
| H | -4.52628900 | -1.36766700 | -4.06175100 | H            | -0.92148000 | -0.79745800 | -2.62321000 |
| C | -2.54595800 | -2.29845900 | -0.87634800 | C            | -3.94848600 | -1.89411700 | -1.53314300 |
| H | -1.98392300 | -2.57015600 | 0.01363400  | H            | -4.54683700 | -1.96368700 | -0.62924500 |
| C | -0.23710200 | -3.18133900 | -3.98727400 | C            | -0.36881200 | 3.51836400  | -0.81089800 |
| H | -0.58743400 | -3.56825900 | -4.93968000 | H            | -0.53320800 | 3.81236900  | 0.21990900  |
| C | 5.15449700  | -1.66936400 | 1.13199000  | C            | -2.33830400 | -2.81352300 | 1.65211200  |
|   |             |             |             | H            | -1.50546400 | -3.18040700 | 1.05012500  |

|   |             |             |             |
|---|-------------|-------------|-------------|
| C | 0.54817400  | 1.99773700  | -2.45066900 |
| H | 1.13528600  | 1.11082500  | -2.68496500 |
| C | 0.39499500  | 2.39203000  | -1.11264200 |
| C | -3.93902600 | -1.05852400 | 2.10585100  |
| H | -4.35018000 | -0.07570400 | 1.89840600  |
| C | -0.04474500 | 2.73696800  | -3.46677200 |
| H | 0.08070200  | 2.42681100  | -4.49993800 |
| C | 3.47326300  | 2.72840600  | -0.76725700 |
| H | 2.79834700  | 3.38583400  | -1.30715500 |
| C | -2.67625900 | 1.82744500  | 1.28464100  |
| H | -2.19397700 | 1.41170900  | 2.16302800  |
| C | 2.96772300  | 1.65256400  | -0.03574500 |
| C | -4.51575500 | -1.84628000 | 3.09996400  |
| H | -5.36727500 | -1.46773000 | 3.65822900  |
| C | -2.77091800 | 1.06854100  | 0.11050900  |
| C | -4.00781700 | -3.11304100 | 3.37228100  |
| H | -4.45988500 | -3.72498100 | 4.14776900  |
| C | 1.13369400  | 3.28721400  | 2.13506800  |
| H | 1.59403700  | 3.94778000  | 1.40510300  |
| C | 5.72219800  | 2.10945600  | -0.14322700 |
| H | 6.79306600  | 2.28402900  | -0.19170100 |
| C | 3.85222100  | 0.80771500  | 0.64193600  |
| H | 3.46835400  | -0.04581300 | 1.19525200  |
| C | -2.41692200 | -1.73274100 | -3.85448800 |
| H | -1.81359600 | -1.67238400 | -4.75538200 |
| C | 0.82240500  | 1.96894600  | 1.78330900  |
| C | -0.80095000 | 3.86784800  | -3.16056100 |
| H | -1.26858800 | 4.44149600  | -3.95559800 |
| C | -2.67967900 | -1.31090600 | -1.48498100 |
| C | 4.84704300  | 2.95325400  | -0.82063700 |
| H | 5.23266500  | 3.78818400  | -1.39832600 |
| C | -2.84102900 | -1.53308000 | 1.38249200  |
| C | 0.03447900  | 1.57728800  | 4.04004500  |
| H | -0.38201200 | 0.90298800  | 4.78227900  |
| C | -4.44549100 | -2.39484800 | -2.73250600 |
| H | -5.43044700 | -2.85174400 | -2.75874200 |
| C | -3.68164600 | -2.31356600 | -3.89455400 |
| H | -4.07029100 | -2.70740300 | -4.82923300 |
| C | -2.92355100 | -3.59581300 | 2.64197800  |
| H | -2.53043200 | -4.58830200 | 2.84320900  |
| C | -0.96290100 | 4.25328300  | -1.83481300 |
| H | -1.56750300 | 5.12038400  | -1.58707500 |
| C | 0.28891200  | 1.11397500  | 2.75114300  |
| H | 0.06598500  | 0.08184500  | 2.48943800  |

|   |             |             |             |
|---|-------------|-------------|-------------|
| C | -3.20823400 | 3.11018300  | 1.34940100  |
| H | -3.12639200 | 3.67731200  | 2.27210900  |
| C | -3.39718600 | 1.63437400  | -1.00315400 |
| H | -3.47392800 | 1.07338000  | -1.92856700 |
| C | 0.31228000  | 2.90030300  | 4.36992500  |
| H | 0.11046300  | 3.26485900  | 5.37288400  |
| C | 5.22214100  | 1.03561400  | 0.59051400  |
| H | 5.89751800  | 0.36273400  | 1.11026000  |
| C | -3.92570300 | 2.92117600  | -0.93905600 |
| H | -4.40626200 | 3.34490800  | -1.81590900 |
| C | -3.83721900 | 3.66152600  | 0.23525100  |
| H | -4.25366900 | 4.66367200  | 0.28274000  |
| C | 2.17219400  | -1.40979700 | -1.15425800 |
| O | 2.43691400  | -0.86746900 | -2.20994700 |
| C | 3.07831700  | -2.42878100 | -0.54923900 |
| C | 2.58545300  | -3.48448400 | 0.22024400  |
| C | 4.45768600  | -2.26004400 | -0.72848500 |
| C | 3.50257500  | -4.35372400 | 0.81733800  |
| C | 5.35564800  | -3.11982000 | -0.11407700 |
| C | 4.87171200  | -4.17193500 | 0.66538600  |
| H | 3.13037000  | -5.18993100 | 1.40644900  |
| H | 6.42479500  | -2.98058900 | -0.24566700 |
| H | 5.56486500  | -4.85704600 | 1.14594500  |
| H | 4.80151800  | -1.43403300 | -1.34369100 |
| N | 0.14647900  | -2.96005200 | -0.37877100 |
| H | 0.20366900  | -3.25330000 | -1.35327900 |
| C | 1.08863400  | -3.73229000 | 0.39827900  |
| H | 0.86157800  | -3.57906500 | 1.46534700  |
| H | 0.92636300  | -4.80798700 | 0.21514400  |

### TSB3

|    |             |             |             |
|----|-------------|-------------|-------------|
| Pd | 0.59095400  | -0.56098200 | -0.38992600 |
| P  | 0.73955500  | 1.75385400  | 0.07252000  |
| P  | -1.88798500 | -0.85961200 | -0.13292500 |
| C  | -1.77724900 | 3.78515300  | 2.67534000  |
| H  | -2.24033600 | 4.76364600  | 2.76447000  |
| C  | -1.61472200 | -2.25784000 | -2.52247900 |
| H  | -0.76458500 | -1.59661900 | -2.67473700 |
| C  | -3.42301100 | -3.04844700 | -1.13630200 |
| H  | -4.00041600 | -3.00576100 | -0.21828200 |
| C  | -0.91730400 | 3.24808300  | -1.62439100 |
| H  | -1.73732200 | 2.91748700  | -0.99752800 |
| C  | -1.64788700 | -1.99428900 | 2.37362900  |
| H  | -0.59562600 | -2.03829000 | 2.11271400  |
| C  | 1.43490700  | 3.32152600  | -2.15175300 |

|   |             |             |             |
|---|-------------|-------------|-------------|
| H | 2.45752300  | 3.02846200  | -1.94549900 |
| C | 0.40054900  | 2.90057000  | -1.30814600 |
| C | -3.91045500 | -1.37007700 | 1.81821000  |
| H | -4.62865500 | -0.93473800 | 1.12922400  |
| C | 1.15384500  | 4.09886400  | -3.27078300 |
| H | 1.96662300  | 4.41902000  | -3.91572000 |
| C | 2.77453600  | 3.59611400  | 0.78542500  |
| H | 2.15521500  | 4.36543800  | 0.33310600  |
| C | -3.43063000 | 1.44667000  | 0.37237000  |
| H | -3.15177200 | 1.31900400  | 1.41334600  |
| C | 2.36497700  | 2.25911700  | 0.75700800  |
| C | -4.33972600 | -1.83323500 | 3.05768400  |
| H | -5.39065700 | -1.76626700 | 3.32312000  |
| C | -3.01058700 | 0.52189400  | -0.59170900 |
| C | -3.42466500 | -2.37842900 | 3.95667400  |
| H | -3.76244300 | -2.73615800 | 4.92490100  |
| C | -0.95318400 | 3.51050800  | 1.58744500  |
| H | -0.78691200 | 4.27455800  | 0.83443000  |
| C | 4.78254500  | 2.96911000  | 1.96679000  |
| H | 5.72590300  | 3.24511400  | 2.42894100  |
| C | 3.16451000  | 1.28582600  | 1.36141900  |
| H | 2.84813700  | 0.24602600  | 1.36468200  |
| C | -1.93926700 | -3.20399500 | -3.48959900 |
| H | -1.35245700 | -3.26418300 | -4.40110800 |
| C | -0.36349400 | 2.25147800  | 1.45332400  |
| C | -0.15845000 | 4.45557000  | -3.56913800 |
| H | -0.37332700 | 5.06131900  | -4.44473900 |
| C | -2.36036100 | -2.16433900 | -1.33983700 |
| C | 3.98090700  | 3.94724700  | 1.38121100  |
| H | 4.29519800  | 4.98679900  | 1.38922900  |
| C | -2.55746800 | -1.44539200 | 1.46645100  |
| C | -1.39852400 | 1.56496000  | 3.53583200  |
| H | -1.57141000 | 0.79639800  | 4.28315700  |
| C | -3.73895500 | -4.00196700 | -2.09996700 |
| H | -4.56200600 | -4.68878500 | -1.92644400 |
| C | -3.00176200 | -4.07889200 | -3.27852600 |
| H | -3.24924400 | -4.82543800 | -4.02734300 |
| C | -2.07850900 | -2.46093200 | 3.61239600  |
| H | -1.35778500 | -2.88164700 | 4.30691800  |
| C | -1.19353500 | 4.02449200  | -2.74469700 |
| H | -2.22395500 | 4.28374200  | -2.96907200 |
| C | -0.57526000 | 1.29147900  | 2.44839100  |
| H | -0.09907900 | 0.31790500  | 2.36627800  |
| C | -4.20686400 | 2.54283800  | 0.00889000  |

|   |             |             |             |
|---|-------------|-------------|-------------|
| H | -4.51708700 | 3.25009500  | 0.77212700  |
| C | -3.37817700 | 0.72470800  | -1.92588100 |
| H | -3.06308900 | 0.02257700  | -2.69131800 |
| C | -2.01052300 | 2.81153100  | 3.64475400  |
| H | -2.66240300 | 3.02711800  | 4.48624600  |
| C | 4.36965500  | 1.64049700  | 1.96187000  |
| H | 4.98511700  | 0.87092100  | 2.41767500  |
| C | -4.15257800 | 1.82324600  | -2.28710700 |
| H | -4.42861300 | 1.96416200  | -3.32780000 |
| C | -4.57020900 | 2.73568300  | -1.32176200 |
| H | -5.17548500 | 3.59196200  | -1.60457900 |
| C | 2.40798100  | -0.41854200 | -1.25906100 |
| O | 2.63415700  | 0.49952200  | -2.02133300 |
| C | 3.47048300  | -1.42970000 | -0.97218800 |
| C | 3.18562600  | -2.79779100 | -0.90700900 |
| C | 4.76949900  | -0.96144900 | -0.75926800 |
| C | 4.22333400  | -3.67860600 | -0.60532100 |
| C | 5.79022300  | -1.85031900 | -0.44366400 |
| C | 5.51385600  | -3.21303800 | -0.36715200 |
| H | 4.00970000  | -4.74216200 | -0.54085500 |
| H | 6.79619200  | -1.48293000 | -0.26248700 |
| H | 6.30334100  | -3.91647900 | -0.11819600 |
| H | 4.96123000  | 0.10479500  | -0.83236900 |
| N | 0.82989700  | -2.61956400 | -0.29620400 |
| H | -0.06714100 | -3.07356100 | -0.45871000 |
| C | 1.78480200  | -3.29537100 | -1.16600700 |
| H | 1.76591200  | -4.37502700 | -0.96078800 |
| H | 1.54487300  | -3.17553700 | -2.23809000 |
| C | 1.69895900  | -3.18628700 | 1.80636900  |
| O | 1.78525400  | -4.34723900 | 1.64491100  |
| O | 1.74972900  | -2.12151500 | 2.31177200  |

### IntB6

|    |             |             |             |
|----|-------------|-------------|-------------|
| Pd | 0.20992500  | 0.71527400  | -0.66275200 |
| P  | 1.07649800  | -1.29727800 | 0.08515400  |
| P  | -2.18264700 | 0.44654000  | -0.15040300 |
| C  | -0.78874900 | -3.08030700 | 3.30249600  |
| H  | -0.73292900 | -3.02076200 | 4.38509300  |
| C  | -3.05538900 | 3.06650900  | -0.27609500 |
| H  | -2.33058100 | 3.21782400  | 0.52008500  |
| C  | -4.13055300 | 1.59930600  | -1.87119400 |
| H  | -4.26335700 | 0.61571800  | -2.31133100 |
| C  | 2.37225200  | 0.33831300  | 1.91664700  |
| H  | 1.54306300  | 1.02155700  | 1.73858100  |
| C  | -3.75944200 | -1.92374900 | -0.53072800 |

|   |             |             |             |
|---|-------------|-------------|-------------|
| H | -4.22116600 | -1.74035100 | 0.43337100  |
| C | 3.54059600  | -1.72235000 | 1.45297600  |
| H | 3.62696100  | -2.66258300 | 0.91806300  |
| C | 2.44714900  | -0.88225400 | 1.23291100  |
| C | -2.17852500 | -1.33737300 | -2.25051100 |
| H | -1.41066900 | -0.67152600 | -2.63968100 |
| C | 4.54699500  | -1.34670600 | 2.33771300  |
| H | 5.39884900  | -2.00245300 | 2.49231000  |
| C | 2.04482500  | -3.82039700 | -0.74896600 |
| H | 1.88191500  | -4.14804300 | 0.27392900  |
| C | -4.13951800 | 0.34281500  | 1.89100100  |
| H | -4.88082900 | 0.41250300  | 1.09901600  |
| C | 1.72791800  | -2.50681100 | -1.12300700 |
| C | -2.52962000 | -2.47466500 | -2.96980900 |
| H | -2.04093900 | -2.68578600 | -3.91612100 |
| C | -2.77557700 | 0.34785300  | 1.57185200  |
| C | -3.49588900 | -3.34424300 | -2.46699600 |
| H | -3.76659500 | -4.23776100 | -3.02182900 |
| C | 0.06357500  | -2.30064500 | 2.52724300  |
| H | 0.77961300  | -1.64749600 | 3.01553000  |
| C | 2.71963300  | -4.31685000 | -3.01031500 |
| H | 3.10707400  | -5.01938500 | -3.74228800 |
| C | 1.88581300  | -2.12045900 | -2.45690600 |
| H | 1.61281800  | -1.11808800 | -2.76956900 |
| C | -3.81728200 | 4.12795600  | -0.74848800 |
| H | -3.68913800 | 5.11385000  | -0.31168100 |
| C | -0.00230900 | -2.35260200 | 1.13200200  |
| C | 4.46643700  | -0.13323300 | 3.01503400  |
| H | 5.25736500  | 0.16174700  | 3.69826600  |
| C | -3.21415800 | 1.79269600  | -0.83596100 |
| C | 2.54395300  | -4.71665900 | -1.68613900 |
| H | 2.78853800  | -5.73091600 | -1.38519900 |
| C | -2.78817400 | -1.05008900 | -1.02137200 |
| C | -1.77022500 | -3.99543000 | 1.30476100  |
| H | -2.48466100 | -4.65136800 | 0.81733600  |
| C | -4.88573600 | 2.67085000  | -2.34383100 |
| H | -5.59681400 | 2.51315800  | -3.14967900 |
| C | -4.73109400 | 3.93430300  | -1.78315600 |
| H | -5.32006200 | 4.76894400  | -2.15275800 |
| C | -4.11111400 | -3.06325700 | -1.25046200 |
| H | -4.86253100 | -3.73874900 | -0.85147800 |
| C | 3.37548500  | 0.70580400  | 2.80635500  |
| H | 3.30985300  | 1.65973200  | 3.31983200  |
| C | -0.92622300 | -3.21099300 | 0.52659300  |

|   |             |             |             |
|---|-------------|-------------|-------------|
| H | -0.99150300 | -3.27265800 | -0.55596000 |
| C | -4.54877500 | 0.27865400  | 3.21733600  |
| H | -5.60800500 | 0.27139600  | 3.45685700  |
| C | -1.83404200 | 0.35053200  | 2.60016700  |
| H | -0.78061500 | 0.43297900  | 2.35774300  |
| C | -1.70826800 | -3.92814100 | 2.69367500  |
| H | -2.37376800 | -4.53593000 | 3.29941800  |
| C | 2.38534900  | -3.02284100 | -3.39429400 |
| H | 2.50598200  | -2.70899800 | -4.42652900 |
| C | -2.24429500 | 0.29214000  | 3.92921700  |
| H | -1.50201800 | 0.29795400  | 4.72178800  |
| C | -3.59905700 | 0.24408500  | 4.23816300  |
| H | -3.91975300 | 0.20139300  | 5.27513100  |
| C | 1.87949500  | 1.23694400  | -1.67482600 |
| O | 1.74746700  | 1.17569000  | -2.87190600 |
| C | 3.14113700  | 1.72548000  | -1.01709600 |
| C | 4.13989400  | 0.76056400  | -0.86334000 |
| C | 4.57237600  | 3.33111800  | 0.04484000  |
| C | 5.33997300  | 1.07120200  | -0.23897700 |
| C | 5.55260200  | 2.36329600  | 0.23028400  |
| H | 4.75504700  | 4.34939400  | 0.38193000  |
| H | 6.09953300  | 0.30566800  | -0.11621900 |
| H | 6.48455100  | 2.62136500  | 0.72459100  |
| H | 3.96608100  | -0.24787800 | -1.22930500 |
| N | 1.35646100  | 4.22410400  | 0.31460500  |
| H | 1.71313800  | 4.42208100  | 1.23952200  |
| C | 0.32168700  | 3.29325800  | 0.33566800  |
| O | -0.20906800 | 3.00084600  | 1.41762900  |
| O | 0.00605800  | 2.82666700  | -0.83378400 |
| C | 3.35605900  | 3.04288900  | -0.58146200 |
| C | 2.33927000  | 4.15962000  | -0.75313200 |
| H | 2.87080000  | 5.11661600  | -0.79298500 |
| H | 1.78883900  | 4.04416700  | -1.68744100 |

**TSB4**

|    |             |             |             |
|----|-------------|-------------|-------------|
| Pd | 0.16816400  | 0.76317200  | -0.29279200 |
| P  | 1.08968000  | -1.31025000 | 0.13768300  |
| P  | -2.27409400 | 0.56255200  | -0.09132700 |
| C  | -0.53242500 | -3.20167700 | 3.42654900  |
| H  | -0.31145500 | -3.28427800 | 4.48683100  |
| C  | -2.69819600 | 3.27960300  | -0.33054400 |
| H  | -1.91272500 | 3.34210000  | 0.41914900  |
| C  | -4.09644900 | 1.94882900  | -1.78780600 |
| H  | -4.41090800 | 0.98135200  | -2.16881600 |
| C  | 2.91039900  | -0.17164500 | 1.88076500  |

|   |             |             |             |
|---|-------------|-------------|-------------|
| H | 2.15038300  | 0.60303000  | 1.96306300  |
| C | -3.89783900 | -1.68972200 | -0.78493900 |
| H | -4.48302600 | -1.49546600 | 0.10868100  |
| C | 3.68429800  | -2.23456600 | 0.89866600  |
| H | 3.53725600  | -3.07848800 | 0.23151400  |
| C | 2.69125200  | -1.26249000 | 1.03166800  |
| C | -2.09244200 | -1.11994000 | -2.27659800 |
| H | -1.26054900 | -0.47205800 | -2.54375600 |
| C | 4.88052200  | -2.11491900 | 1.60078700  |
| H | 5.65165900  | -2.87080600 | 1.48326900  |
| C | 1.45930200  | -3.77418000 | -1.23405200 |
| H | 1.37072600  | -4.26050600 | -0.26651300 |
| C | -4.50058000 | 0.67946600  | 1.66499100  |
| H | -5.05040800 | 1.13297700  | 0.84461600  |
| C | 1.36003300  | -2.38050700 | -1.32612200 |
| C | -2.36938100 | -2.24085300 | -3.05078600 |
| H | -1.75641800 | -2.45810200 | -3.92034200 |
| C | -3.15376400 | 0.33773700  | 1.49619000  |
| C | -3.40960700 | -3.09526500 | -2.68889300 |
| H | -3.61901800 | -3.98055000 | -3.28221300 |
| C | 0.33470500  | -2.49383600 | 2.59735000  |
| H | 1.21862900  | -2.02855400 | 3.02214800  |
| C | 1.73060900  | -3.93125100 | -3.62599500 |
| H | 1.87233900  | -4.53420200 | -4.51822400 |
| C | 1.43560300  | -1.77433600 | -2.58481700 |
| H | 1.33357600  | -0.69553000 | -2.67512700 |
| C | -3.29731400 | 4.43536500  | -0.81863000 |
| H | -2.97986100 | 5.40351300  | -0.44295500 |
| C | 0.06627000  | -2.37560400 | 1.23043300  |
| C | 5.09009700  | -1.02906700 | 2.44654200  |
| H | 6.02706200  | -0.93433900 | 2.98756300  |
| C | -3.10192200 | 2.02732800  | -0.81017200 |
| C | 1.64495100  | -4.54415200 | -2.37729800 |
| H | 1.71695400  | -5.62455700 | -2.29395200 |
| C | -2.84615400 | -0.83813100 | -1.12996400 |
| C | -1.94075800 | -3.69579200 | 1.53831100  |
| H | -2.82854100 | -4.15492000 | 1.11428000  |
| C | -4.68603500 | 3.11138300  | -2.27942400 |
| H | -5.45617200 | 3.04364200  | -3.04246700 |
| C | -4.28917100 | 4.35402200  | -1.79426200 |
| H | -4.74862200 | 5.25969000  | -2.17988300 |
| C | -4.17676400 | -2.81272500 | -1.56171200 |
| H | -4.99069700 | -3.47387000 | -1.27764300 |
| C | 4.10054800  | -0.05967500 | 2.59012600  |

|   |             |             |             |
|---|-------------|-------------|-------------|
| H | 4.26312700  | 0.79650000  | 3.23740800  |
| C | -1.07576400 | -2.99358000 | 0.70736200  |
| H | -1.29403400 | -2.92813100 | -0.35399400 |
| C | -5.13455900 | 0.44925100  | 2.88141100  |
| H | -6.17929500 | 0.71931100  | 3.00521900  |
| C | -2.44952400 | -0.21379800 | 2.56774900  |
| H | -1.39859600 | -0.45619700 | 2.45114000  |
| C | -1.67533300 | -3.79721100 | 2.90156900  |
| H | -2.35617200 | -4.33880000 | 3.55139100  |
| C | 1.62652300  | -2.54719400 | -3.72791300 |
| H | 1.68536100  | -2.06303300 | -4.69809100 |
| C | -3.08618700 | -0.44902300 | 3.78273500  |
| H | -2.52651300 | -0.88550200 | 4.60448300  |
| C | -4.42887700 | -0.12009300 | 3.94036900  |
| H | -4.92559300 | -0.29726600 | 4.89009400  |
| C | 1.71151600  | 1.71924300  | -1.28194000 |
| O | 1.37160200  | 1.68933700  | -2.44327700 |
| C | 3.13981100  | 1.79724400  | -0.81746300 |
| C | 3.91043500  | 0.66954500  | -1.10994400 |
| C | 5.09201500  | 2.82506600  | 0.14008300  |
| C | 5.25123600  | 0.60473600  | -0.75988100 |
| C | 5.84371300  | 1.68418000  | -0.11454800 |
| H | 5.56476900  | 3.68352600  | 0.61177300  |
| H | 5.82232600  | -0.29166600 | -0.97833000 |
| H | 6.88899900  | 1.64504800  | 0.17691400  |
| H | 3.44504900  | -0.17377300 | -1.60991400 |
| N | 1.97070400  | 4.12571600  | 1.03863100  |
| H | 2.22908200  | 4.25301600  | 2.00541600  |
| C | 0.88383200  | 3.31502800  | 0.83818000  |
| O | 0.12636000  | 3.00195100  | 1.74818000  |
| O | 0.72360200  | 2.95959800  | -0.43606600 |
| C | 3.74348300  | 2.91209000  | -0.21418800 |
| C | 3.00239000  | 4.21175700  | 0.02308300  |
| H | 3.71221200  | 4.98421500  | 0.33261800  |
| H | 2.53537500  | 4.55128800  | -0.90553900 |

### IntB7

|    |             |             |             |
|----|-------------|-------------|-------------|
| Pd | 0.00253300  | 0.46745100  | -0.51687000 |
| P  | 1.98625300  | -0.60827700 | 0.03434700  |
| P  | -2.17164900 | -0.32452300 | -0.18403800 |
| C  | 2.21543400  | -4.23558900 | 2.05705800  |
| H  | 2.76736100  | -4.66964000 | 2.88598700  |
| C  | -3.93004600 | 1.78214500  | 0.21546400  |
| H  | -3.21492900 | 2.08036200  | 0.97770800  |
| C  | -4.64151200 | 0.24586900  | -1.50334900 |

|   |             |             |             |               |             |             |             |
|---|-------------|-------------|-------------|---------------|-------------|-------------|-------------|
| H | -4.49202100 | -0.65914900 | -2.08448700 | H             | -3.37853700 | -5.05231800 | -1.32750200 |
| C | 2.12798800  | 0.14714900  | 2.72647500  | C             | 2.58898800  | 0.89214100  | 3.80805900  |
| H | 1.24997200  | -0.47930000 | 2.85221400  | H             | 2.07933000  | 0.81896900  | 4.76386600  |
| C | -2.91137700 | -3.01338200 | -0.83344600 | C             | 0.80148800  | -3.11260900 | -0.05476300 |
| H | -3.31162600 | -3.09486100 | 0.17231500  | H             | 0.22453100  | -2.66675300 | -0.86017500 |
| C | 3.85732200  | 1.08394600  | 1.33990200  | C             | -4.00943300 | -1.66792300 | 3.28169400  |
| H | 4.35843100  | 1.16853400  | 0.38071200  | H             | -5.00835700 | -1.68931800 | 3.70788300  |
| C | 2.76281400  | 0.22441200  | 1.47794400  | C             | -1.46000400 | -1.59164100 | 2.18812000  |
| C | -1.83314800 | -1.73405400 | -2.56414900 | H             | -0.46614300 | -1.56253500 | 1.75670000  |
| H | -1.37132100 | -0.80717300 | -2.89780200 | C             | 1.26050500  | -4.99178300 | 1.38180900  |
| C | 4.31201400  | 1.83979100  | 2.41933100  | H             | 1.06183600  | -6.01498400 | 1.68727800  |
| H | 5.16537700  | 2.49994400  | 2.29101400  | C             | 4.11146700  | -0.98531100 | -3.44504300 |
| C | 4.66057500  | -1.28194700 | -0.73225400 | H             | 3.88961500  | -0.87825400 | -4.50308000 |
| H | 4.87821500  | -1.41508500 | 0.32416200  | C             | -1.66568000 | -2.20237900 | 3.41951100  |
| C | -3.80388900 | -1.07045800 | 2.04000100  | H             | -0.82539400 | -2.64806100 | 3.94454000  |
| H | -4.64467200 | -0.63573000 | 1.50832900  | C             | -2.94348100 | -2.23729300 | 3.97266200  |
| C | 3.38460700  | -0.87131700 | -1.13545500 | H             | -3.10831100 | -2.70490600 | 4.93923100  |
| C | -1.87899800 | -2.83365300 | -3.41412400 | C             | -1.03087800 | 3.47741400  | -0.53925300 |
| H | -1.47197500 | -2.75863000 | -4.41838100 | O             | -1.95852700 | 3.81153700  | -1.22444300 |
| C | -2.52396200 | -1.02535000 | 1.48088900  | C             | 0.26839700  | 3.00748000  | -1.11151800 |
| C | -2.43027100 | -4.03433200 | -2.96990700 | C             | 0.22887500  | 2.45078100  | -2.39993200 |
| H | -2.45477900 | -4.89911300 | -3.62657500 | C             | 2.67778200  | 3.10013300  | -1.25008000 |
| C | 2.46658700  | -2.91995400 | 1.67511800  | C             | 1.40907400  | 2.21722600  | -3.09864000 |
| H | 3.21000500  | -2.34034900 | 2.21518800  | C             | 2.63345500  | 2.55467200  | -2.52895800 |
| C | 5.38311700  | -1.37003800 | -3.03260400 | H             | 3.63421400  | 3.35847400  | -0.80375100 |
| H | 6.16043900  | -1.56045700 | -3.76692900 | H             | 1.36839000  | 1.78642200  | -4.09425900 |
| C | 3.11935600  | -0.73562800 | -2.49910100 | H             | 3.55536400  | 2.37415000  | -3.07254700 |
| H | 2.12526300  | -0.43009600 | -2.81257400 | H             | -0.73908400 | 2.27049100  | -2.85552300 |
| C | -5.06163000 | 2.55661300  | -0.00863300 | N             | 0.85356700  | 3.14532600  | 1.84611300  |
| H | -5.21421400 | 3.46098800  | 0.57224000  | H             | 1.38719000  | 2.49966900  | 2.41346400  |
| C | 1.75361000  | -2.34187400 | 0.62101500  | C             | -0.46333200 | 2.85332600  | 1.75506200  |
| C | 3.68235800  | 1.74603200  | 3.65770000  | O             | -1.07588200 | 2.09213600  | 2.45921300  |
| H | 4.03644500  | 2.33399600  | 4.49892000  | O             | -1.14157600 | 3.63587900  | 0.81944600  |
| C | -3.71081700 | 0.61691800  | -0.52972200 | C             | 1.50988700  | 3.32180000  | -0.52470000 |
| C | 5.65584200  | -1.52015600 | -1.67331400 | C             | 1.55700500  | 3.93642000  | 0.85411300  |
| H | 6.64396000  | -1.83203800 | -1.34762000 | H             | 2.59150000  | 4.02589800  | 1.19126300  |
| C | -2.35024700 | -1.80891400 | -1.26431100 | H             | 1.12799900  | 4.94544300  | 0.83696900  |
| C | 0.55801400  | -4.42949800 | 0.31908600  |               |             |             |             |
| H | -0.19736000 | -5.00230600 | -0.21035000 | <b>prodB1</b> |             |             |             |
| C | -5.77039400 | 1.03019500  | -1.73168800 | C             | 0.64313900  | 1.35809800  | -0.39827400 |
| H | -6.48610700 | 0.73272400  | -2.49299900 | O             | 0.62166900  | 2.52285400  | -0.68494700 |
| C | -5.98319500 | 2.18485200  | -0.98510200 | C             | -0.59130700 | 0.56656000  | -0.10737500 |
| H | -6.86274900 | 2.79617700  | -1.16578800 | C             | -1.68538400 | 1.26671900  | 0.40308200  |
| C | -2.94601900 | -4.12016700 | -1.68009800 | C             | -1.92513700 | -1.43713700 | -0.19242800 |
|   |             |             |             | C             | -2.88919200 | 0.61350100  | 0.63629000  |

C -3.00928300 -0.73993800 0.33444700  
H -2.02679100 -2.49183600 -0.43469800  
H -3.73298000 1.16066800 1.04399800  
H -3.94895600 -1.25569200 0.50715800  
H -1.57653100 2.32694900 0.60536400  
N 1.59613600 -1.54327300 -0.02639800  
H 1.68964300 -2.31648100 0.61620300  
C 2.13386100 -0.38332400 0.43543400  
O 2.85966000 -0.26990100 1.38430700  
O 1.85235800 0.71064100 -0.38308700  
C -0.70828200 -0.79845500 -0.41549600  
C 0.48324500 -1.54999600 -0.96401000  
H 0.22314300 -2.59177200 -1.16319400  
H 0.82005800 -1.11383400 -1.91024900

**IntB8**

Pd -0.27700400 -0.92579500 -0.01178800  
P -1.53542400 1.03296200 -0.10948300  
P 1.97248300 0.10646300 0.11142100  
C -0.29731500 4.40294400 -2.18148100  
H -0.25905000 5.47842800 -2.03697200  
C 2.68790000 -1.64734600 2.16775400  
H 1.98438500 -2.31913800 1.68876400  
C 3.84583000 0.46438100 2.23135200  
H 4.03353000 1.45388200 1.82669900  
C -1.02451200 1.39493300 2.60472800  
H -0.42367700 0.49392500 2.49402900  
C 2.55249200 -0.66650800 -2.50399800  
H 1.47905200 -0.79128500 -2.59636800  
C -2.51900600 3.02775100 1.64564200  
H -3.09665600 3.39660700 0.80268100  
C -1.69748200 1.90414400 1.49176900  
C 4.49037200 -0.21705300 -1.14257100  
H 4.93330300 0.04321200 -0.18592700  
C -2.62136900 3.65939200 2.88003900  
H -3.25586000 4.53395800 2.98766800  
C -3.66771900 1.15974600 -1.97150400  
H -2.93933200 1.49407300 -2.70283200  
C 2.61871200 2.67436400 -0.92628500  
H 2.94126400 2.16417800 -1.82741300  
C -3.28647800 0.92843300 -0.64883900  
C 5.31396500 -0.46022300 -2.23639700  
H 6.39196500 -0.39017600 -2.12516900  
C 2.12577200 1.94336700 0.15708700  
C 4.75784000 -0.79724500 -3.46849400

H 5.40238300 -0.99022400 -4.32113100  
C -0.78483900 3.59221300 -1.16042900  
H -1.10539600 4.04541600 -0.22909500  
C -5.93681000 0.52671000 -1.44739400  
H -6.96379300 0.36197400 -1.75963600  
C -4.24967500 0.50514500 0.27336100  
H -3.96923700 0.31229700 1.30388600  
C 3.38903500 -2.06332100 3.29557900  
H 3.21395000 -3.05695000 3.69761900  
C -0.82462100 2.20777100 -1.32411600  
C -1.92397600 3.16090800 3.97945000  
H -2.01026000 3.65151400 4.94453100  
C 2.90470000 -0.37692300 1.62467800  
C -4.98828300 0.96067800 -2.36655200  
H -5.27163000 1.14399800 -3.39878500  
C 3.10158800 -0.31318300 -1.26974400  
C 0.13491100 2.46004400 -3.53672700  
H 0.50255300 2.01007100 -4.45395700  
C 4.54296600 0.04790700 3.36184500  
H 5.26768200 0.71395600 3.82099100  
C 4.31383600 -1.21576300 3.89901500  
H 4.85837300 -1.54005400 4.78114400  
C 3.37658500 -0.90101900 -3.60059000  
H 2.93757200 -1.18584600 -4.55190000  
C -1.13586000 2.02219200 3.84355300  
H -0.60789400 1.61720700 4.70189700  
C -0.34909400 1.64904600 -2.51653500  
H -0.36253200 0.56891500 -2.63977600  
C 2.69882100 4.06310200 -0.86252400  
H 3.08337100 4.61385400 -1.71573900  
C 1.70994200 2.63726300 1.29916700  
H 1.34775900 2.09106000 2.16233100  
C 0.15558900 3.84248400 -3.37174300  
H 0.53666300 4.48031400 -4.16380000  
C -5.56394600 0.30192500 -0.12423400  
H -6.29466500 -0.04604900 0.59908800  
C 1.78191100 4.02372200 1.36014400  
H 1.45089500 4.53759400 2.25789900  
C 2.28195300 4.74245700 0.27724000  
H 2.34533900 5.82588700 0.32192100  
C -2.07271600 -1.87842700 -0.02471300  
C -2.67060200 -2.26843700 1.18015100  
C -2.72200000 -2.15334100 -1.22932200  
C -3.90936900 -2.91964000 1.14572000



|   |             |             |             |
|---|-------------|-------------|-------------|
| C | -3.95900900 | -2.78742700 | -1.25026400 |
| H | -2.25607900 | -1.86658600 | -2.16751400 |
| C | -4.56041300 | -3.17136800 | -0.05462400 |
| H | -4.36779400 | -3.23393000 | 2.08200400  |
| H | -4.44903500 | -2.98475700 | -2.19964900 |
| H | -5.52332300 | -3.67413100 | -0.05805000 |
| I | 0.75871800  | -3.39884200 | -0.71561200 |
| C | -2.05045500 | -1.97541700 | 2.53012800  |
| H | -2.45472900 | -2.68624900 | 3.26778700  |
| H | -2.35690300 | -0.97312300 | 2.86471100  |
| N | -0.59052900 | -1.98241900 | 2.46894100  |
| H | -0.18643400 | -1.84439400 | 3.39132500  |
| H | -0.26281200 | -2.88098300 | 2.11879300  |

**IntB9**

|    |             |             |             |
|----|-------------|-------------|-------------|
| C  | 2.13875400  | -1.79331500 | -0.70601000 |
| C  | 2.07879800  | -2.87725000 | -1.60160300 |
| C  | 3.35727600  | -1.54898200 | -0.06818700 |
| C  | 3.20499200  | -3.65484600 | -1.86486400 |
| C  | 4.48492600  | -2.32591900 | -0.33098300 |
| C  | 4.41518300  | -3.37649300 | -1.23874800 |
| H  | 3.12959700  | -4.49645500 | -2.55012200 |
| H  | 5.41790500  | -2.10676000 | 0.18155400  |
| H  | 5.28964300  | -3.98742600 | -1.44351500 |
| H  | 3.45615300  | -0.74385100 | 0.65239200  |
| N  | -0.29284000 | -2.73197100 | -1.29444100 |
| H  | -1.21302900 | -2.73339100 | -1.72715900 |
| Pd | 0.32459500  | -0.89480300 | -0.39049800 |
| P  | -1.96599100 | -0.16023000 | -0.15968600 |
| C  | -2.54782800 | 0.44061900  | 1.46265900  |
| C  | -3.14646200 | -1.52283300 | -0.48414300 |
| C  | -2.38182800 | 1.08917500  | -1.43377600 |
| C  | -1.66703100 | 0.38133000  | 2.54386200  |
| C  | -3.86374500 | 0.87071200  | 1.67158800  |
| C  | -4.16711700 | -1.45572700 | -1.43520500 |
| C  | -2.97885100 | -2.68493100 | 0.28198000  |
| C  | -3.14903200 | 2.23565700  | -1.23185900 |
| C  | -1.86041200 | 0.84086700  | -2.71179300 |
| H  | -0.68391600 | -0.05414000 | 2.40948400  |
| C  | -2.07174100 | 0.81919500  | 3.80232100  |
| H  | -4.58376800 | 0.83943300  | 0.85837100  |
| C  | -4.26368800 | 1.31473200  | 2.92670800  |
| H  | -4.30062800 | -0.55992600 | -2.03478800 |
| C  | -5.01833500 | -2.54423000 | -1.61769200 |
| H  | -2.15909200 | -2.74701400 | 0.99747100  |

|   |             |             |             |
|---|-------------|-------------|-------------|
| C | -3.82956400 | -3.76727800 | 0.08916200  |
| C | -3.41313600 | 3.10121200  | -2.29136100 |
| H | -3.51932700 | 2.48028400  | -0.24317600 |
| C | -2.12811800 | 1.70170600  | -3.76859500 |
| H | -1.23171000 | -0.03272300 | -2.87158700 |
| C | -3.36223600 | 1.30348300  | 3.99073800  |
| H | -1.37474800 | 0.76847700  | 4.63338800  |
| H | -5.28349600 | 1.65552000  | 3.07920400  |
| C | -4.85055700 | -3.69839500 | -0.85762400 |
| H | -5.81156100 | -2.48816400 | -2.35765500 |
| H | -3.67833700 | -4.66989200 | 0.67274700  |
| H | -4.00395500 | 3.99520400  | -2.11509400 |
| C | -2.91282500 | 2.83459200  | -3.56044000 |
| H | -1.72003800 | 1.49201400  | -4.75292700 |
| H | -3.67781900 | 1.64747800  | 4.97152900  |
| H | -5.51128200 | -4.54738100 | -1.00799700 |
| H | -3.12218400 | 3.51167900  | -4.38337600 |
| C | 2.76659900  | 1.45362400  | -0.96874300 |
| P | 1.33776500  | 1.11644600  | 0.13496300  |
| C | 2.65402000  | 1.05250700  | -2.30446300 |
| C | 3.93654200  | 2.08555600  | -0.54638300 |
| C | 1.94520400  | 1.23289600  | 1.85644200  |
| C | 0.33798400  | 2.65048600  | -0.04909900 |
| H | 1.76591800  | 0.51431600  | -2.62551900 |
| C | 3.68069000  | 1.30297200  | -3.20665600 |
| H | 4.06178100  | 2.37425200  | 0.49146700  |
| C | 4.97174400  | 2.32140200  | -1.44770200 |
| C | 1.90960100  | 0.08857300  | 2.65990500  |
| C | 2.40979200  | 2.44085700  | 2.39610800  |
| C | 0.29573000  | 3.33470000  | -1.26787100 |
| C | -0.42110400 | 3.13089300  | 1.02305400  |
| C | 4.84433700  | 1.93746000  | -2.77853400 |
| H | 3.58093200  | 0.98242300  | -4.23919800 |
| H | 5.88292100  | 2.80149600  | -1.10350200 |
| H | 1.48587700  | -0.84276500 | 2.28136300  |
| C | 2.35822900  | 0.15149700  | 3.97795500  |
| C | 2.86049900  | 2.49475900  | 3.70948900  |
| H | 2.39770700  | 3.34702500  | 1.79662700  |
| H | 0.87247300  | 2.97917000  | -2.11526200 |
| C | -0.47214300 | 4.48593300  | -1.40285700 |
| H | -0.40642400 | 2.61662900  | 1.97743800  |
| C | -1.19168200 | 4.28113500  | 0.88406100  |
| H | 5.65461300  | 2.11955800  | -3.47819100 |
| H | 2.31926500  | -0.74248900 | 4.59280800  |

|   |             |             |             |   |             |             |             |
|---|-------------|-------------|-------------|---|-------------|-------------|-------------|
| C | 2.84016300  | 1.34662100  | 4.50093400  | H | -4.44582700 | -0.90159400 | -1.02306800 |
| H | 3.21942100  | 3.43452900  | 4.11844700  | C | -3.98200000 | -1.62090800 | -2.99242500 |
| H | -0.49361600 | 5.00536000  | -2.35586000 | H | -4.19443200 | 0.63463100  | 1.98110200  |
| C | -1.21332300 | 4.96575200  | -0.32674400 | C | -5.34673200 | 2.30557000  | 1.28136000  |
| H | -1.77142000 | 4.63956900  | 1.72940800  | H | -2.73662300 | 2.59129700  | -1.56176300 |
| H | 3.18890400  | 1.39113200  | 5.52870200  | C | -4.54443400 | 3.38978300  | -0.71515400 |
| H | -1.81043200 | 5.86663800  | -0.43450600 | C | -3.13314300 | -2.79443300 | 2.46258400  |
| C | 0.74973300  | -3.18107500 | -2.23155400 | H | -3.32854200 | -2.36238200 | 0.37157600  |
| H | 0.63054100  | -2.62642200 | -3.17160900 | C | -1.85998500 | -1.21973300 | 3.76591500  |
| H | 0.64247800  | -4.24980500 | -2.45686200 | H | -1.05744700 | 0.45785700  | 2.68329400  |
| C | 0.37218700  | -3.41929800 | 1.77903300  | C | -3.01650500 | -1.71180800 | -3.99443400 |
| C | 1.55770900  | -3.80084700 | 2.66315000  | H | -0.99920600 | -1.21549100 | -4.57169300 |
| H | 1.48299400  | -3.32598600 | 3.64631800  | H | -4.97971100 | -2.01553700 | -3.16021000 |
| H | 1.63989500  | -4.88488200 | 2.76995800  | C | -5.47958500 | 3.29617200  | 0.31363400  |
| H | 2.46890400  | -3.43364900 | 2.17297100  | H | -6.07102300 | 2.22851200  | 2.08703200  |
| O | -0.02513800 | -4.26504600 | 0.93924800  | H | -4.63621900 | 4.16723300  | -1.46751100 |
| O | -0.09017900 | -2.24820600 | 1.91726600  | H | -3.69509600 | -3.72078700 | 2.38903300  |
| H | -0.32631200 | -3.37848800 | -0.46499400 | C | -2.60768600 | -2.39231800 | 3.68625400  |

### IntB10

|    |             |             |             |   |             |             |             |
|----|-------------|-------------|-------------|---|-------------|-------------|-------------|
| C  | 1.99014800  | 2.45135700  | 0.04386000  | H | -3.25986000 | -2.18576600 | -4.94088000 |
| C  | 1.72524400  | 3.82577700  | 0.21452000  | H | -6.30752000 | 3.99746900  | 0.36239900  |
| C  | 3.32629500  | 2.08428800  | -0.16336100 | H | -2.76942900 | -2.99708300 | 4.57383100  |
| C  | 2.75083100  | 4.77113900  | 0.17778400  | C | 2.77097300  | -0.83605300 | 1.22893700  |
| C  | 4.35432800  | 3.02599800  | -0.19335600 | P | 1.44502000  | -0.76105200 | -0.04012900 |
| C  | 4.06933500  | 4.37639500  | -0.02148800 | C | 2.61841700  | -0.04279300 | 2.36943500  |
| H  | 2.51297800  | 5.82590200  | 0.30346400  | C | 3.88171400  | -1.67729500 | 1.12645900  |
| H  | 5.37865100  | 2.69821200  | -0.35336300 | C | 2.24895600  | -1.08172900 | -1.66202700 |
| H  | 4.86534000  | 5.11603100  | -0.04852700 | C | 0.57675500  | -2.35626600 | 0.27628500  |
| H  | 3.60459400  | 1.04522100  | -0.30748100 | H | 1.77885200  | 0.64397300  | 2.42997600  |
| N  | -0.56429700 | 3.13401500  | -0.03588200 | C | 3.55328600  | -0.10169000 | 3.39851900  |
| H  | -1.42866800 | 3.14973700  | 0.50004600  | H | 4.02793700  | -2.28695700 | 0.24090200  |
| Pd | 0.27304800  | 1.30095600  | 0.02144200  | C | 4.82237700  | -1.72576100 | 2.15008500  |
| P  | -1.93222500 | 0.33500900  | 0.01417200  | C | 2.34513600  | -0.02590400 | -2.57505400 |
| C  | -2.39052400 | -0.50433400 | -1.54894400 | C | 2.73749500  | -2.34220700 | -2.03053300 |
| C  | -3.34795300 | 1.49030200  | 0.18931100  | C | 0.55026400  | -2.90756200 | 1.56118800  |
| C  | -2.20169000 | -0.83602500 | 1.39623600  | C | -0.10225300 | -3.01790500 | -0.75254000 |
| C  | -1.44281600 | -0.56738500 | -2.57287300 | C | 4.65701100  | -0.94229800 | 3.28983700  |
| C  | -3.67583200 | -1.00834900 | -1.78240500 | H | 3.42710500  | 0.52453500  | 4.27645700  |
| C  | -4.28521400 | 1.40496400  | 1.22185100  | H | 5.68772700  | -2.37509200 | 2.05554200  |
| C  | -3.48271500 | 2.49501400  | -0.77908400 | H | 1.96495300  | 0.95480900  | -2.30135100 |
| C  | -2.93267700 | -2.02154300 | 1.32176400  | C | 2.93119700  | -0.22259600 | -3.82285600 |
| C  | -1.65260500 | -0.45095800 | 2.62646200  | C | 3.32471100  | -2.53612400 | -3.27602300 |
| H  | -0.45885200 | -0.13384500 | -2.41845400 | H | 2.63450400  | -3.18515100 | -1.35332300 |
| C  | -1.75066900 | -1.17235600 | -3.78896600 | H | 1.06302100  | -2.40983400 | 2.37775100  |

|   |             |             |             |
|---|-------------|-------------|-------------|
| C | -0.12443100 | -4.09897900 | 1.80527800  |
| H | -0.09326000 | -2.61708700 | -1.75969600 |
| C | -0.77930500 | -4.20799200 | -0.50631400 |
| H | 5.39347400  | -0.98045700 | 4.08716000  |
| H | 3.00043800  | 0.60833600  | -4.51815000 |
| C | 3.42395500  | -1.47539900 | -4.17413000 |
| H | 3.69860600  | -3.51879800 | -3.54798700 |
| H | -0.13511200 | -4.51041100 | 2.80986900  |
| C | -0.78749500 | -4.75533500 | 0.77274800  |
| H | -1.29592000 | -4.70667800 | -1.32112500 |
| H | 3.87964400  | -1.62871300 | -5.14804800 |
| H | -1.31200500 | -5.68670000 | 0.96581300  |
| C | 0.29932100  | 4.19980000  | 0.46096000  |
| H | 0.17385900  | 4.37787400  | 1.54489800  |
| H | 0.05481200  | 5.15606200  | -0.03282100 |

**TSB5**

|    |             |             |             |
|----|-------------|-------------|-------------|
| Pd | -0.22147100 | 1.02985400  | -0.10735000 |
| P  | -1.58968200 | -0.88026500 | 0.04381800  |
| P  | 2.00134400  | 0.01503200  | -0.14038500 |
| C  | -0.26086300 | -4.59810800 | 1.31676100  |
| H  | -0.33626600 | -5.63789700 | 1.01146900  |
| C  | 2.58842700  | 2.00813600  | -1.99911300 |
| H  | 1.52783200  | 1.94366900  | -2.23082300 |
| C  | 4.47658200  | 1.32990200  | -0.66067500 |
| H  | 4.90545800  | 0.72955700  | 0.13551700  |
| C  | -1.23598400 | -2.08692800 | -2.41525200 |
| H  | -0.18181300 | -2.00665100 | -2.17133400 |
| C  | 2.43115600  | 0.31188700  | 2.56384400  |
| H  | 1.61150800  | 1.02200200  | 2.48916500  |
| C  | -3.55195800 | -1.72960300 | -1.84881800 |
| H  | -4.31576100 | -1.37550700 | -1.16359300 |
| C  | -2.20143700 | -1.63703900 | -1.50608500 |
| C  | 3.90883800  | -1.29656900 | 1.53477100  |
| H  | 4.25628700  | -1.83436700 | 0.65747000  |
| C  | -3.92914700 | -2.27140300 | -3.07615700 |
| H  | -4.98234700 | -2.33145100 | -3.33368600 |
| C  | -3.90357100 | -1.73946600 | 1.40123100  |
| H  | -3.71293100 | -2.70814100 | 0.94655800  |
| C  | 2.04371100  | -2.76555200 | -0.63620600 |
| H  | 1.91220000  | -2.89144700 | 0.43314500  |
| C  | -3.06119400 | -0.65518300 | 1.12057400  |
| C  | 4.50005800  | -1.54074700 | 2.77064400  |
| H  | 5.30633500  | -2.26414800 | 2.84840300  |
| C  | 2.19842500  | -1.48713900 | -1.18323800 |

|   |             |             |             |
|---|-------------|-------------|-------------|
| C | 4.05919100  | -0.85992900 | 3.90369400  |
| H | 4.52004600  | -1.05496800 | 4.86768900  |
| C | -0.89146200 | -3.61127300 | 0.56164200  |
| H | -1.43831500 | -3.88633500 | -0.33509900 |
| C | -5.21347800 | -0.35877000 | 2.87957300  |
| H | -6.05138500 | -0.24236800 | 3.56082300  |
| C | -3.29377900 | 0.56905100  | 1.74890800  |
| H | -2.63663700 | 1.40767100  | 1.54920900  |
| C | 3.39835400  | 2.89976800  | -2.69453700 |
| H | 2.96944900  | 3.51408600  | -3.48040400 |
| C | -0.79660600 | -2.27207900 | 0.94214100  |
| C | -2.96467100 | -2.73188000 | -3.96634300 |
| H | -3.26262700 | -3.15555600 | -4.92088500 |
| C | 3.12248700  | 1.20715800  | -0.98100800 |
| C | -4.97913000 | -1.58961300 | 2.26744000  |
| H | -5.62901400 | -2.43504200 | 2.47292800  |
| C | 2.86250500  | -0.37468200 | 1.42466800  |
| C | 0.55933900  | -2.91947100 | 2.84208100  |
| H | 1.13630700  | -2.63680000 | 3.71752000  |
| C | 5.28280400  | 2.23255100  | -1.34955800 |
| H | 6.33217300  | 2.32472300  | -1.08568900 |
| C | 4.74762000  | 3.01508700  | -2.36861600 |
| H | 5.37848700  | 3.71965900  | -2.90239400 |
| C | 3.02899000  | 0.07108900  | 3.79746800  |
| H | 2.67979700  | 0.60677700  | 4.67492200  |
| C | -1.61485600 | -2.64000400 | -3.63158000 |
| H | -0.85023600 | -2.99016800 | -4.31860700 |
| C | -0.08280300 | -1.93686100 | 2.09750700  |
| H | -0.01865500 | -0.89711500 | 2.40733300  |
| C | 2.05064600  | -3.89110300 | -1.45460100 |
| H | 1.91917100  | -4.87168900 | -1.00734500 |
| C | 2.36895900  | -1.36423700 | -2.56763700 |
| H | 2.49578300  | -0.38520100 | -3.01788300 |
| C | 0.47380200  | -4.25448600 | 2.44898600  |
| H | 0.97678100  | -5.02509500 | 3.02576400  |
| C | -4.36743200 | 0.71453600  | 2.62476000  |
| H | -4.53785000 | 1.67265400  | 3.10582900  |
| C | 2.37429900  | -2.49133600 | -3.38378900 |
| H | 2.50783700  | -2.37531400 | -4.45525800 |
| C | 2.21032800  | -3.75907000 | -2.83050200 |
| H | 2.21085000  | -4.63810500 | -3.46816500 |
| C | -1.71852900 | 2.27767500  | -0.74691200 |
| C | -1.32376700 | 3.62939900  | -0.81000900 |
| C | -3.00357600 | 1.95493600  | -1.19592000 |

|   |             |            |             |
|---|-------------|------------|-------------|
| C | -2.20756200 | 4.61048500 | -1.26103300 |
| C | -3.87923500 | 2.93321000 | -1.66402000 |
| C | -3.48634000 | 4.26792600 | -1.68690400 |
| H | -1.88825500 | 5.65050000 | -1.28203500 |
| H | -4.87044400 | 2.64828000 | -2.00778700 |
| H | -4.16994500 | 5.03624700 | -2.03799700 |
| H | -3.35202900 | 0.92724400 | -1.19157600 |
| N | 0.58798000  | 2.83994800 | 0.38854000  |
| H | 1.60568300  | 2.86301400 | 0.37098300  |
| C | 0.09188400  | 3.93687000 | -0.43035500 |
| H | 0.16197100  | 4.88981700 | 0.11685500  |
| H | 0.68169700  | 4.06505900 | -1.35681400 |
| C | -0.31043400 | 3.23864200 | 2.60141300  |
| O | -0.45519600 | 4.39464400 | 2.48217800  |
| O | -0.29078200 | 2.13951900 | 3.02372000  |

**IntB11**

|    |             |             |             |
|----|-------------|-------------|-------------|
| Pd | 0.26908400  | -0.90038000 | -0.38243200 |
| P  | 1.54296100  | 0.91154000  | 0.22393400  |
| P  | -2.06892700 | -0.06333400 | -0.20389000 |
| C  | 0.31087300  | 3.55162300  | 3.15477900  |
| H  | 0.40454100  | 4.61044300  | 3.37748100  |
| C  | -2.54695200 | -1.66286300 | -2.45131300 |
| H  | -1.46909400 | -1.77336600 | -2.50189600 |
| C  | -4.52222000 | -0.85528500 | -1.31904000 |
| H  | -4.98043300 | -0.30583000 | -0.50106700 |
| C  | 0.82883300  | 2.36809700  | -2.02013000 |
| H  | 0.05025600  | 1.61880400  | -2.12327300 |
| C  | -2.81257800 | -1.63345600 | 1.92654200  |
| H  | -2.30619000 | -2.42694500 | 1.37956800  |
| C  | 2.76167300  | 3.22886600  | -0.85641100 |
| H  | 3.49923600  | 3.14609000  | -0.06284100 |
| C  | 1.74913400  | 2.26852000  | -0.97432200 |
| C  | -3.64947800 | 0.63043600  | 2.08057700  |
| H  | -3.77178300 | 1.62478200  | 1.66397600  |
| C  | 2.83523300  | 4.28102100  | -1.76265200 |
| H  | 3.62438600  | 5.02068200  | -1.66701500 |
| C  | 3.48001500  | 0.09484200  | 2.08115800  |
| H  | 2.69280400  | 0.16911000  | 2.82507900  |
| C  | -1.94738800 | 2.71843000  | 0.23971600  |
| H  | -1.63032800 | 2.47489600  | 1.24707700  |
| C  | 3.24025700  | 0.48050300  | 0.76016900  |
| C  | -4.22299100 | 0.33209100  | 3.31485500  |
| H  | -4.78128800 | 1.09778800  | 3.84593800  |
| C  | -2.32653500 | 1.70112600  | -0.64525200 |

|   |             |             |             |
|---|-------------|-------------|-------------|
| C | -4.08559100 | -0.94095200 | 3.86059300  |
| H | -4.53228100 | -1.17133700 | 4.82368900  |
| C | 0.94029800  | 3.02634500  | 2.03056100  |
| H | 1.50047300  | 3.68447200  | 1.37428000  |
| C | 5.74559200  | -0.50738300 | 1.51191200  |
| H | 6.71557500  | -0.90049900 | 1.80133600  |
| C | 4.27233200  | 0.37936800  | -0.17847700 |
| H | 4.09862500  | 0.65785000  | -1.21217100 |
| C | -3.35266200 | -2.28262900 | -3.40332800 |
| H | -2.89324200 | -2.85333300 | -4.20442000 |
| C | 0.81225600  | 1.66871200  | 1.72513600  |
| C | 1.90078800  | 4.38325900  | -2.79207800 |
| H | 1.95990200  | 5.20712300  | -3.49717400 |
| C | -3.12834900 | -0.93942700 | -1.40832200 |
| C | 4.72796400  | -0.39691100 | 2.45378500  |
| H | 4.90088000  | -0.69598700 | 3.48324500  |
| C | -2.92604300 | -0.34352300 | 1.38894700  |
| C | -0.56646200 | 1.37119400  | 3.69748000  |
| H | -1.17130700 | 0.72248000  | 4.32317300  |
| C | -5.32330500 | -1.47750900 | -2.26869200 |
| H | -6.40444800 | -1.41222000 | -2.19038700 |
| C | -4.73767300 | -2.18989100 | -3.31412700 |
| H | -5.36393100 | -2.68164900 | -4.05287700 |
| C | -3.39064900 | -1.92389100 | 3.15767000  |
| H | -3.29837900 | -2.92867700 | 3.55830900  |
| C | 0.89929800  | 3.42612700  | -2.92102900 |
| H | 0.16853700  | 3.49819000  | -3.72012200 |
| C | 0.06478100  | 0.84509100  | 2.57416400  |
| H | -0.05896000 | -0.20853800 | 2.33711900  |
| C | -1.97138200 | 4.05112500  | -0.15589900 |
| H | -1.66652500 | 4.82015300  | 0.54766100  |
| C | -2.74082100 | 2.05624300  | -1.93444600 |
| H | -3.04453500 | 1.28743900  | -2.63796400 |
| C | -0.44885300 | 2.72815500  | 3.98458400  |
| H | -0.95227700 | 3.14642100  | 4.85104400  |
| C | 5.51579600  | -0.11385600 | 0.19587600  |
| H | 6.30117500  | -0.20427300 | -0.54782300 |
| C | -2.76231400 | 3.39161600  | -2.32900000 |
| H | -3.08805900 | 3.64734300  | -3.33322900 |
| C | -2.37258700 | 4.39281400  | -1.44419200 |
| H | -2.38410400 | 5.43300200  | -1.75576900 |
| C | 1.98250100  | -1.73753200 | -0.99791900 |
| C | 2.49937000  | -1.40834900 | -2.24899300 |
| C | 3.72291100  | -3.36932400 | -0.70886300 |

|   |             |             |             |
|---|-------------|-------------|-------------|
| C | 3.64177600  | -2.05420300 | -2.72457800 |
| C | 4.26173000  | -3.02710400 | -1.94719400 |
| H | 4.19529800  | -4.14503700 | -0.10996900 |
| H | 4.04776800  | -1.78974600 | -3.69765000 |
| H | 5.15667900  | -3.52681500 | -2.30694600 |
| H | 2.03224500  | -0.63102400 | -2.85065100 |
| N | 0.83272100  | -4.04496500 | 0.95353400  |
| H | 0.74621300  | -4.71736900 | 1.70114000  |
| C | -0.44088600 | -3.75098000 | 0.44718100  |
| O | -1.37488300 | -4.45319300 | 0.83600100  |
| O | -0.58260300 | -2.79879200 | -0.42638800 |
| C | 2.57641100  | -2.73721400 | -0.22887200 |
| C | 1.95277600  | -3.12752700 | 1.08878300  |
| H | 2.69951000  | -3.63552400 | 1.70796600  |
| H | 1.66423900  | -2.20864100 | 1.62873000  |

**TSB6**

|    |             |             |             |
|----|-------------|-------------|-------------|
| Pd | -0.14977700 | -1.00060800 | -0.38406700 |
| P  | 2.07331900  | -0.12471600 | -0.21587400 |
| P  | -1.45339500 | 0.98685300  | 0.15217400  |
| C  | 2.06350400  | 3.23584600  | 2.15660800  |
| H  | 1.79546500  | 4.28313600  | 2.05182400  |
| C  | -4.04344300 | 0.00460000  | 0.37099200  |
| H  | -3.66204500 | -0.49364400 | 1.25762600  |
| C  | -3.70445400 | 1.45644900  | -1.52249100 |
| H  | -3.06947200 | 2.10717100  | -2.11559000 |
| C  | 2.01277900  | 0.26822600  | -2.96265000 |
| H  | 1.36030600  | -0.60152100 | -2.94936300 |
| C  | -0.71405200 | 0.80819300  | 2.82771300  |
| H  | 0.01934300  | 0.06553500  | 2.51760000  |
| C  | 3.34635900  | 1.89480600  | -1.79323700 |
| H  | 3.75335700  | 2.30157900  | -0.87290700 |
| C  | 2.50632100  | 0.77797800  | -1.75647300 |
| C  | -2.58243300 | 2.28226100  | 2.38719600  |
| H  | -3.29773000 | 2.71515800  | 1.69243800  |
| C  | 3.66378800  | 2.50103100  | -3.00589000 |
| H  | 4.31146800  | 3.37263300  | -3.01585700 |
| C  | 3.22652900  | -2.59608900 | 0.44557900  |
| H  | 2.23766200  | -2.93658200 | 0.74549500  |
| C  | -0.86818900 | 3.77139100  | -0.06798700 |
| H  | -1.21537400 | 3.88643400  | 0.95324800  |
| C  | 3.45508600  | -1.31503700 | -0.05761300 |
| C  | -2.65583400 | 2.59542400  | 3.73847600  |
| H  | -3.41772500 | 3.28384500  | 4.09222800  |
| C  | -0.88741200 | 2.51526400  | -0.67981700 |

|   |             |             |             |
|---|-------------|-------------|-------------|
| C | -1.75959700 | 2.01660900  | 4.63877100  |
| H | -1.82585200 | 2.25573700  | 5.69638000  |
| C | 1.98846100  | 2.39722900  | 1.04955300  |
| H | 1.66217500  | 2.80478600  | 0.09941000  |
| C | 5.58646900  | -3.08994100 | 0.26492100  |
| H | 6.41490800  | -3.78183600 | 0.38872300  |
| C | 4.75872100  | -0.92493700 | -0.39683900 |
| H | 4.95187500  | 0.06635700  | -0.79481500 |
| C | -5.36607600 | -0.18414700 | -0.00812800 |
| H | -6.00675800 | -0.83013700 | 0.58427900  |
| C | 2.32551000  | 1.04471700  | 1.16381300  |
| C | 3.15988500  | 1.99072200  | -4.19850600 |
| H | 3.41003300  | 2.46392100  | -5.14348700 |
| C | -3.20154200 | 0.83133700  | -0.37969100 |
| C | 4.29653600  | -3.47601100 | 0.60615900  |
| H | 4.10138600  | -4.46465300 | 1.00918900  |
| C | -1.59934600 | 1.39594400  | 1.92206300  |
| C | 2.80596400  | 1.38304400  | 3.50498100  |
| H | 3.11204300  | 0.97729400  | 4.46431200  |
| C | -5.02960700 | 1.26034500  | -1.90409300 |
| H | -5.41088500 | 1.75525600  | -2.79244700 |
| C | -5.86289100 | 0.44248800  | -1.14819300 |
| H | -6.89687700 | 0.29305900  | -1.44463900 |
| C | -0.80017200 | 1.12003900  | 4.18366600  |
| H | -0.11129400 | 0.64121600  | 4.87208800  |
| C | 2.33747700  | 0.86630300  | -4.17515900 |
| H | 1.94653700  | 0.45456600  | -5.10088400 |
| C | 2.73063300  | 0.53706300  | 2.40298000  |
| H | 2.92391100  | -0.52343400 | 2.52326700  |
| C | -0.35779900 | 4.87267000  | -0.74881500 |
| H | -0.33395900 | 5.84188100  | -0.25949400 |
| C | -0.40210400 | 2.38693300  | -1.98465100 |
| H | -0.39325500 | 1.41032800  | -2.46007600 |
| C | 2.47468700  | 2.73033400  | 3.38640700  |
| H | 2.52742900  | 3.38318600  | 4.25288500  |
| C | 5.81683700  | -1.80941000 | -0.23836100 |
| H | 6.82258900  | -1.49987200 | -0.50761100 |
| C | 0.10435800  | 3.48808300  | -2.66715100 |
| H | 0.50371600  | 3.36097500  | -3.66828600 |
| C | 0.13405100  | 4.73284900  | -2.04504100 |
| H | 0.54543500  | 5.59243800  | -2.56565800 |
| C | -1.78681800 | -2.24724200 | -1.06269300 |
| C | -2.32475700 | -1.92101100 | -2.31024600 |
| C | -3.83569200 | -3.33357300 | -0.46533100 |

|             |             |             |             |   |             |             |             |
|-------------|-------------|-------------|-------------|---|-------------|-------------|-------------|
| C           | -3.63117100 | -2.27619000 | -2.62490900 | H | -5.40280900 | -1.56264400 | 3.70652100  |
| C           | -4.38172400 | -2.99522100 | -1.69933600 | C | -2.73197700 | 1.17043800  | 0.29991400  |
| H           | -4.43597700 | -3.88447200 | 0.25550800  | C | -4.02164900 | -3.17580900 | 3.35110100  |
| H           | -4.05730400 | -1.99725600 | -3.58340100 | H | -4.46075300 | -3.82261700 | 4.10532700  |
| H           | -5.40288200 | -3.28162800 | -1.93344000 | C | 1.61422500  | 3.16082000  | 2.06606900  |
| H           | -1.71962900 | -1.38573200 | -3.03702300 | H | 2.12744100  | 3.74418000  | 1.30632600  |
| N           | -1.08124200 | -2.34663200 | 1.79334600  | C | 5.79329300  | 1.51409000  | -0.75158500 |
| H           | -1.48112100 | -1.70835700 | 2.46775500  | H | 6.86206700  | 1.55875400  | -0.93924600 |
| C           | 0.28315000  | -2.72507300 | 2.12177000  | C | 3.94882600  | 1.06491400  | 0.73526200  |
| O           | 0.91000800  | -1.87079000 | 2.78605600  | H | 3.58987900  | 0.74367200  | 1.70902500  |
| O           | 0.66979300  | -3.80442300 | 1.62777200  | C | -2.68482600 | -1.69426000 | -3.77144300 |
| C           | 0.08888500  | -2.71777600 | -1.16665200 | H | -2.07365200 | -1.81580500 | -4.66082800 |
| O           | 0.48674200  | -3.67567500 | -1.66744500 | C | 1.09637300  | 1.90016300  | 1.74410400  |
| C           | -2.53813900 | -2.95802900 | -0.11590700 | C | -0.93311200 | 3.88195900  | -2.99280000 |
| C           | -1.97467500 | -3.33631400 | 1.24116300  | H | -1.45455600 | 4.48662800  | -3.72921200 |
| H           | -2.80742400 | -3.56116600 | 1.92114800  | C | -2.86589500 | -1.11830200 | -1.42712200 |
| H           | -1.37520000 | -4.24979200 | 1.13594400  | C | 4.89165300  | 1.83647300  | -1.76193300 |
| <b>TSB7</b> |             |             |             | H | 5.25356500  | 2.13450100  | -2.74149100 |
| Pd          | 0.35486800  | -0.93576100 | -0.20694200 | C | -2.88936000 | -1.50766500 | 1.41663900  |
| P           | 1.24408000  | 1.18294900  | 0.06797100  | C | 0.38096000  | 1.63485100  | 4.04325800  |
| P           | -2.05988800 | -0.52562700 | 0.11125600  | H | -0.08615800 | 1.02944300  | 4.81433100  |
| C           | 1.48998000  | 3.66370300  | 3.35614700  | C | -4.82420400 | -1.81776400 | -2.66602200 |
| H           | 1.88824400  | 4.64556300  | 3.59398500  | H | -5.88803800 | -2.03468700 | -2.69449300 |
| C           | -2.09337300 | -1.27548600 | -2.58164800 | C | -4.04903000 | -1.96444700 | -3.81531000 |
| H           | -1.02302200 | -1.08546500 | -2.54931600 | H | -4.50897300 | -2.29574600 | -4.74191600 |
| C           | -4.23579600 | -1.39727100 | -1.47861300 | C | -2.93001600 | -3.61434200 | 2.60376700  |
| H           | -4.84308700 | -1.28957900 | -0.58396000 | H | -2.51757400 | -4.60500000 | 2.77212000  |
| C           | -0.12020200 | 3.57163000  | -0.73982700 | C | -0.78369600 | 4.34421200  | -1.68970900 |
| H           | -0.04666400 | 3.93251700  | 0.28019600  | H | -1.19976200 | 5.30462700  | -1.40048000 |
| C           | -2.35969300 | -2.78523600 | 1.64360600  | C | 0.49700200  | 1.13567400  | 2.74764200  |
| H           | -1.51066900 | -3.11863600 | 1.04585900  | H | 0.12348900  | 0.14233300  | 2.50845100  |
| C           | 0.23272400  | 1.85559000  | -2.40056400 | C | -2.96176600 | 3.15851800  | 1.67259500  |
| H           | 0.61817200  | 0.87495000  | -2.67509900 | H | -2.81583000 | 3.65611500  | 2.62693400  |
| C           | 0.40450500  | 2.32764700  | -1.09046000 | C | -3.30972000 | 1.86318200  | -0.76727000 |
| C           | -3.98942300 | -1.07519800 | 2.16195300  | H | -3.43795500 | 1.37507700  | -1.72782500 |
| H           | -4.40848100 | -0.08733600 | 1.99360900  | C | 0.86744700  | 2.90288200  | 4.34512400  |
| C           | -0.42571200 | 2.63342400  | -3.34631300 | H | 0.77638800  | 3.29471700  | 5.35399500  |
| H           | -0.54968400 | 2.25795700  | -4.35771200 | C | 5.31700800  | 1.12857200  | 0.49916800  |
| C           | 3.52011800  | 1.78387200  | -1.52431500 | H | 6.01078400  | 0.86180400  | 1.29070300  |
| H           | 2.83136700  | 2.04345300  | -2.32141400 | C | -3.71653000 | 3.18577500  | -0.61189600 |
| C           | -2.55726500 | 1.83773800  | 1.51921800  | H | -4.15999500 | 3.70979200  | -1.45337300 |
| H           | -2.10742500 | 1.32080400  | 2.36081100  | C | -3.54666000 | 3.83683800  | 0.60544200  |
| C           | 3.03615200  | 1.40385700  | -0.27056000 | H | -3.86346400 | 4.86925900  | 0.72216500  |
| C           | -4.54980400 | -1.90717900 | 3.12883700  | C | 1.85764300  | -1.68950700 | -1.29829500 |

|               |             |             |             |   |             |             |             |
|---------------|-------------|-------------|-------------|---|-------------|-------------|-------------|
| O             | 1.87499000  | -1.35455900 | -2.46709500 | C | 2.08653200  | 2.22683900  | 0.27907600  |
| C             | 2.95424000  | -2.38499500 | -0.58181000 | C | 5.94287100  | 0.23713300  | -2.93802200 |
| C             | 2.61935700  | -3.44120000 | 0.25961800  | H | 6.82650900  | 0.16043900  | -3.56486600 |
| C             | 4.27468800  | -1.95006300 | -0.70261500 | C | -3.74431500 | 2.82512600  | -0.20543400 |
| C             | 3.61734100  | -4.04820100 | 1.01802500  | H | -4.56600300 | 2.13915700  | -0.01923400 |
| C             | 5.26479000  | -2.55996300 | 0.05806500  | C | -5.91644200 | -1.48473800 | -1.78543900 |
| C             | 4.93473000  | -3.60695300 | 0.92006700  | H | -6.80194700 | -1.97148900 | -2.18368400 |
| H             | 3.36650200  | -4.87662300 | 1.67739100  | C | -3.88451700 | -0.23414400 | -2.13130100 |
| H             | 6.29304900  | -2.21838400 | -0.01861500 | H | -3.17452900 | 0.23903600  | -2.80603500 |
| H             | 5.71001900  | -4.08692600 | 1.51108600  | C | 1.88424200  | -1.53517700 | 3.26321900  |
| H             | 4.50866500  | -1.12744700 | -1.37209600 | H | 1.07815700  | -1.75996500 | 3.95320700  |
| N             | 0.29733100  | -3.02565900 | -0.52550900 | C | -2.44731400 | 2.32898300  | -0.37938900 |
| H             | 0.13426800  | -3.38535400 | -1.45806800 | C | -1.66394500 | -0.14456600 | 4.35082400  |
| C             | 1.16164200  | -3.87530500 | 0.25794600  | H | -1.52279500 | -0.31613900 | 5.41413000  |
| H             | 0.81341800  | -3.90796400 | 1.30264700  | C | 2.62649600  | -0.47718300 | 1.20502400  |
| H             | 1.11327700  | -4.91072000 | -0.11081300 | C | -5.66549400 | -1.49968500 | -0.41718300 |
| <b>IntB12</b> |             |             |             | H | -6.35677900 | -1.99616300 | 0.25780900  |
| Pd            | 0.03268700  | -0.11174900 | -0.99369300 | C | 3.66537400  | 0.44056600  | -1.32108500 |
| P             | -2.04714400 | 0.54230200  | -0.22150500 | C | -1.64543800 | 4.59513300  | -0.67218400 |
| P             | 2.13770000  | 0.47655700  | -0.29965000 | H | -0.81902400 | 5.27679600  | -0.84895000 |
| C             | -3.98828600 | 4.19299900  | -0.26987400 | C | 4.16870400  | -1.78328000 | 2.54382100  |
| H             | -4.99927400 | 4.56757200  | -0.13726500 | H | 5.16650500  | -2.18645800 | 2.69275700  |
| C             | 1.61774700  | -0.77311000 | 2.13151700  | C | 3.16302800  | -2.04705300 | 3.47148100  |
| H             | 0.60363100  | -0.42982300 | 1.95097500  | H | 3.37151200  | -2.65915100 | 4.34408100  |
| C             | 3.90599000  | -0.99825600 | 1.42183500  | C | 4.78042600  | -0.44394000 | -3.28499300 |
| H             | 4.70390900  | -0.80829800 | 0.71146000  | H | 4.75173600  | -1.05129500 | -4.18489600 |
| C             | -1.94874800 | 1.38277400  | 2.49695800  | C | -1.76896100 | 1.15409600  | 3.86031500  |
| H             | -2.02270100 | 2.40172600  | 2.13016400  | H | -1.71255700 | 1.99893000  | 4.54111800  |
| C             | 3.64699200  | -0.33659800 | -2.48172600 | C | -1.40174700 | 3.22515800  | -0.61831400 |
| H             | 2.72745300  | -0.84883300 | -2.75669800 | H | -0.39363300 | 2.84459600  | -0.75687200 |
| C             | -1.88891500 | -0.99194100 | 2.10765400  | C | 2.15761900  | 4.58959500  | -0.26858400 |
| H             | -1.88425600 | -1.83676500 | 1.42793400  | H | 2.38309800  | 5.37707300  | -0.98227500 |
| C             | -2.01391800 | 0.30921100  | 1.60409200  | C | 1.58803700  | 2.55791700  | 1.54310500  |
| C             | 4.83944300  | 1.12712600  | -0.98520500 | H | 1.34691400  | 1.77874200  | 2.25874300  |
| H             | 4.86370800  | 1.74618000  | -0.09230200 | C | -2.93829000 | 5.08049900  | -0.50053000 |
| C             | -1.72865600 | -1.22212000 | 3.46893800  | H | -3.13083500 | 6.14865600  | -0.54811800 |
| H             | -1.61892200 | -2.24395400 | 3.81851400  | C | -5.02495700 | -0.83992600 | -2.64324200 |
| C             | -4.53142500 | -0.87165800 | 0.09774200  | H | -5.21390800 | -0.82163100 | -3.71281500 |
| H             | -4.35279200 | -0.88392900 | 1.16847800  | C | 1.37719100  | 3.88742900  | 1.89516900  |
| C             | 2.36217900  | 3.25958300  | -0.62505400 | H | 0.98436800  | 4.12310600  | 2.87993500  |
| H             | 2.73548300  | 3.02535900  | -1.61829000 | C | 1.66179000  | 4.90862200  | 0.99303100  |
| C             | -3.62575200 | -0.23895300 | -0.75479100 | H | 1.49435900  | 5.94546600  | 1.26931300  |
| C             | 5.97005300  | 1.02637800  | -1.78854700 | C | 0.21553800  | -3.82249200 | 1.07581100  |
| H             | 6.87432400  | 1.56421900  | -1.51903700 | O | -0.25098400 | -3.99544300 | 2.18992700  |

|   |             |             |             |
|---|-------------|-------------|-------------|
| C | -0.51671300 | -3.57716600 | -0.19787100 |
| C | 0.40105600  | -3.24714000 | -1.18744000 |
| C | -1.88466400 | -3.58757200 | -0.43840500 |
| C | -0.03752600 | -2.86793900 | -2.45195400 |
| C | -2.32882700 | -3.22228600 | -1.70393400 |
| C | -1.41267700 | -2.84922800 | -2.69285800 |
| H | 0.66428200  | -2.59588000 | -3.23556600 |
| H | -3.39237100 | -3.19613600 | -1.91908500 |
| H | -1.77958200 | -2.53921900 | -3.66679900 |
| H | -2.57924400 | -3.86137700 | 0.35026500  |
| N | 1.54534400  | -3.78394000 | 0.74008800  |
| H | 2.24035000  | -3.66679300 | 1.46355400  |
| C | 1.79743700  | -3.38550200 | -0.63305300 |
| H | 2.35524000  | -2.44513000 | -0.67964100 |
| H | 2.37081300  | -4.15100800 | -1.17203400 |

**prodB2**

|   |             |             |             |
|---|-------------|-------------|-------------|
| C | -1.59059300 | -0.56217900 | 0.00003600  |
| O | -2.27984900 | -1.56337000 | 0.00002100  |
| C | -0.10316300 | -0.45429700 | 0.00012400  |
| C | 0.25967000  | 0.88716000  | 0.00012300  |
| C | 0.84239500  | -1.46978200 | -0.00003700 |
| C | 1.59846800  | 1.25476500  | 0.00002500  |
| C | 2.18623900  | -1.10694400 | -0.00004100 |
| C | 2.55711400  | 0.24170200  | -0.00003900 |
| H | 1.89881500  | 2.29893400  | 0.00006500  |
| H | 2.95527200  | -1.87335900 | -0.00009200 |
| H | 3.61089000  | 0.50465300  | -0.00007800 |
| H | 0.52710800  | -2.50845900 | -0.00003300 |
| N | -2.03392600 | 0.73914400  | -0.00013300 |
| H | -3.01787300 | 0.95372800  | -0.00011700 |
| C | -0.98666400 | 1.74117700  | -0.00001200 |
| H | -1.03923400 | 2.38391100  | -0.88826500 |
| H | -1.03949600 | 2.38393000  | 0.88820900  |

**TSB8**

|    |             |             |             |
|----|-------------|-------------|-------------|
| Pd | 0.24248600  | -1.12813300 | 0.02314900  |
| P  | -2.02117300 | -0.24188900 | 0.08236500  |
| P  | 1.48105200  | 0.85149700  | -0.12775000 |
| C  | -2.20816200 | 3.80114900  | -0.63782700 |
| H  | -1.87559300 | 4.70001000  | -0.12725600 |
| C  | 3.99242100  | -0.03549500 | -0.88325800 |
| H  | 3.45291100  | -0.51660800 | -1.69423200 |
| C  | 3.99238600  | 1.32689400  | 1.10868100  |
| H  | 3.46484400  | 1.92534200  | 1.84506000  |
| C  | -1.98167900 | -0.95955800 | 2.76563200  |

|   |             |             |             |
|---|-------------|-------------|-------------|
| H | -1.23256900 | -1.67711300 | 2.43974700  |
| C | 0.30866000  | 1.40271100  | -2.60018700 |
| H | -0.34241100 | 0.56956700  | -2.35882900 |
| C | -3.52809500 | 0.82031900  | 2.25375600  |
| H | -3.99430200 | 1.49057200  | 1.53806100  |
| C | -2.56492700 | -0.09971400 | 1.82763900  |
| C | 2.20779500  | 2.78701600  | -2.06174700 |
| H | 3.03772600  | 3.03495000  | -1.40530100 |
| C | -3.88467100 | 0.89463200  | 3.59731300  |
| H | -4.62798900 | 1.61891800  | 3.91714000  |
| C | -2.91528000 | -1.94218800 | -1.91774500 |
| H | -1.92824500 | -1.76745000 | -2.33926900 |
| C | 1.02773700  | 3.43085000  | 1.03010400  |
| H | 1.39493800  | 3.87161800  | 0.10934500  |
| C | -3.25233900 | -1.35378000 | -0.69412200 |
| C | 2.04164000  | 3.47946600  | -3.25545300 |
| H | 2.73022100  | 4.27754600  | -3.51685800 |
| C | 0.98331900  | 2.04166700  | 1.17763700  |
| C | 1.00040200  | 3.14203000  | -4.11895600 |
| H | 0.87121400  | 3.68427600  | -5.05113000 |
| C | -2.04097700 | 2.56731000  | -0.01959800 |
| H | -1.59905300 | 2.52712300  | 0.96968800  |
| C | -5.07156800 | -3.01525200 | -2.01261300 |
| H | -5.77689000 | -3.66668800 | -2.52000500 |
| C | -4.50611100 | -1.60768300 | -0.13453600 |
| H | -4.77760800 | -1.16606500 | 0.81934300  |
| C | 5.36011000  | -0.22754700 | -0.75516000 |
| H | 5.88563300  | -0.84870600 | -1.47357400 |
| C | -2.44716400 | 1.38899000  | -0.65614100 |
| C | -3.29139800 | 0.04379300  | 4.52633300  |
| H | -3.56932400 | 0.10423600  | 5.57460100  |
| C | 3.29762000  | 0.73949600  | 0.05243300  |
| C | -3.82408400 | -2.76251500 | -2.57770600 |
| H | -3.55147700 | -3.21683000 | -3.52563200 |
| C | 1.32495600  | 1.75682800  | -1.71215800 |
| C | -3.22105300 | 2.71648400  | -2.52977500 |
| H | -3.69134700 | 2.76755700  | -3.50750700 |
| C | 5.36762300  | 1.13530600  | 1.23283200  |
| H | 5.90107900  | 1.59273000  | 2.06099500  |
| C | 6.05068300  | 0.35586600  | 0.30670400  |
| H | 7.11984300  | 0.19688900  | 0.41217700  |
| C | 0.14037400  | 2.09855400  | -3.79414100 |
| H | -0.66315700 | 1.81942200  | -4.46859500 |
| C | -2.34512400 | -0.88848000 | 4.10684700  |



|               |             |             |             |   |             |             |             |
|---------------|-------------|-------------|-------------|---|-------------|-------------|-------------|
| H             | -1.88444500 | -1.56126600 | 4.82387500  | C | 0.51441300  | 1.39915800  | -2.59886200 |
| C             | -3.05213700 | 1.47962600  | -1.91381300 | H | -0.17520000 | 0.59586700  | -2.36199400 |
| H             | -3.39113500 | 0.58284500  | -2.42255400 | C | -3.33942600 | 1.23318400  | 2.12655400  |
| C             | 0.55405200  | 4.25904100  | 2.04345700  | H | -3.67509500 | 1.94530600  | 1.37947900  |
| H             | 0.58161500  | 5.33706800  | 1.91332200  | C | -2.56794000 | 0.12973500  | 1.75121500  |
| C             | 0.47725200  | 1.50105900  | 2.36434000  | C | 2.41652200  | 2.75685200  | -2.00956100 |
| H             | 0.41864500  | 0.42189500  | 2.47355100  | H | 3.22362800  | 3.00251300  | -1.32439300 |
| C             | -2.79042200 | 3.87984400  | -1.89961800 | C | -3.67243300 | 1.43635500  | 3.46337500  |
| H             | -2.91423500 | 4.84284500  | -2.38588300 | H | -4.26641900 | 2.30141400  | 3.74361100  |
| C             | -5.40864000 | -2.44017800 | -0.79051200 | C | -3.00994300 | -2.09712700 | -1.74512100 |
| H             | -6.37728600 | -2.64136400 | -0.34274900 | H | -1.97935100 | -2.17273100 | -2.07945600 |
| C             | -0.00426900 | 2.32767300  | 3.37480700  | C | 1.19009900  | 3.47399900  | 1.06423800  |
| H             | -0.42692800 | 1.88614800  | 4.27218500  | H | 1.61595400  | 3.89939300  | 0.16144100  |
| C             | 0.02874800  | 3.71011700  | 3.21219300  | C | -3.33352400 | -1.25789800 | -0.67624800 |
| H             | -0.35827700 | 4.36002300  | 3.99148100  | C | 2.31617100  | 3.42424100  | -3.22486900 |
| C             | 1.97436900  | -2.15138200 | 0.44798400  | H | 3.03097100  | 4.20315900  | -3.47354500 |
| C             | 2.41137200  | -3.08627600 | -0.48858000 | C | 1.08681900  | 2.08711000  | 1.20797800  |
| C             | 2.75079700  | -1.90861200 | 1.58436500  | C | 1.30793500  | 3.08571300  | -4.12629900 |
| C             | 3.65371500  | -3.70554800 | -0.32042700 | H | 1.23079800  | 3.60816600  | -5.07540500 |
| C             | 3.98268900  | -2.53316400 | 1.75246300  | C | -1.81688000 | 2.59342800  | -0.33538400 |
| C             | 4.44616300  | -3.42293000 | 0.78497800  | H | -1.36363200 | 2.60931000  | 0.64900800  |
| H             | 3.99194800  | -4.43049600 | -1.05952200 | C | -5.30857200 | -2.80710500 | -1.90201100 |
| H             | 4.58544000  | -2.31451700 | 2.62987200  | H | -6.07632200 | -3.41317700 | -2.37420100 |
| H             | 5.41212700  | -3.90639700 | 0.90187900  | C | -4.65377700 | -1.20358700 | -0.22253700 |
| H             | 2.41545600  | -1.19622400 | 2.33422700  | H | -4.91477700 | -0.56237000 | 0.61421900  |
| C             | -0.43236700 | -3.16268500 | -0.03771400 | C | 5.42383000  | -0.32864000 | -0.64187600 |
| O             | -0.80951600 | -4.29949200 | -0.07175400 | H | 5.94713100  | -0.93591200 | -1.37371300 |
| C             | 1.52119300  | -3.48685800 | -1.64751200 | C | -2.32355000 | 1.39653500  | -0.85504200 |
| H             | 1.99009000  | -3.19242700 | -2.59853800 | C | -3.24583800 | 0.53465400  | 4.43419100  |
| H             | 1.45289700  | -4.58773100 | -1.65183400 | H | -3.50409600 | 0.69518800  | 5.47717800  |
| N             | 0.19674300  | -2.87801900 | -1.54167700 | C | 3.37316300  | 0.67976000  | 0.15063800  |
| H             | -0.43164100 | -3.41092500 | -2.14279000 | C | -3.99509600 | -2.86521100 | -2.35864800 |
| <b>IntB13</b> |             |             |             | H | -3.73096100 | -3.51983200 | -3.18376100 |
| Pd            | 0.21672200  | -1.16474700 | 0.07702600  | C | 1.49871900  | 1.75292500  | -1.67470600 |
| P             | -2.02346200 | -0.19008100 | 0.02812600  | C | -3.00615500 | 2.60101700  | -2.84415600 |
| P             | 1.56609800  | 0.86639000  | -0.07320500 | H | -3.47959100 | 2.59778200  | -3.82181300 |
| C             | -1.89294200 | 3.77414900  | -1.06449100 | C | 5.42088300  | 0.93927200  | 1.40759900  |
| H             | -1.48330600 | 4.68691300  | -0.64213400 | H | 5.94554600  | 1.33797400  | 2.27102000  |
| C             | 4.06698500  | -0.08377700 | -0.79528800 | C | 6.10383300  | 0.18020800  | 0.46396900  |
| H             | 3.53449500  | -0.51449700 | -1.63878400 | H | 7.16360300  | -0.02078900 | 0.59067400  |
| C             | 4.05834100  | 1.19129100  | 1.25205500  | C | 0.41314200  | 2.06726300  | -3.81594600 |
| H             | 3.53189900  | 1.78050400  | 1.99703300  | H | -0.36796500 | 1.78959600  | -4.51664600 |
| C             | -2.16044500 | -0.78850200 | 2.72820800  | C | -2.49887700 | -0.58144600 | 4.06189600  |
| H             | -1.61000800 | -1.67960300 | 2.43179800  | H | -2.17998700 | -1.30000800 | 4.81106100  |

|             |             |             |             |   |             |             |             |
|-------------|-------------|-------------|-------------|---|-------------|-------------|-------------|
| C           | -2.92950000 | 1.41677800  | -2.11544200 | H | -0.20467900 | 1.19268500  | -2.32590000 |
| H           | -3.34123600 | 0.50483800  | -2.53643500 | C | -3.34532600 | 1.05317800  | 2.20886800  |
| C           | 0.70132300  | 4.31942500  | 2.05559100  | H | -3.71428100 | 1.80923200  | 1.52263200  |
| H           | 0.77392600  | 5.39576400  | 1.92863700  | C | -2.56818400 | -0.00700400 | 1.73377400  |
| C           | 0.50729000  | 1.56582300  | 2.37001500  | C | 2.72211800  | 2.83675400  | -1.81532100 |
| H           | 0.40082300  | 0.48975700  | 2.48128200  | H | 3.55668700  | 2.87682800  | -1.12029000 |
| C           | -2.48107600 | 3.78098600  | -2.32610900 | C | -3.63497200 | 1.16231700  | 3.56656400  |
| H           | -2.53355900 | 4.70113800  | -2.90031100 | H | -4.23201300 | 1.99661000  | 3.92348700  |
| C           | -5.63557400 | -1.97842000 | -0.83102900 | C | -3.15461300 | -2.18390900 | -1.68419700 |
| H           | -6.65755700 | -1.93721400 | -0.46602700 | H | -2.11756800 | -2.39050100 | -1.93419200 |
| C           | 0.01563800  | 2.41065500  | 3.36073100  | C | 1.23198600  | 3.42067000  | 1.20822200  |
| H           | -0.46312000 | 1.98539700  | 4.23722800  | H | 1.67448700  | 3.88869800  | 0.33458100  |
| C           | 0.10647600  | 3.79017000  | 3.20022900  | C | -3.45544600 | -1.21093000 | -0.72934800 |
| H           | -0.29062200 | 4.45432700  | 3.96224300  | C | 2.71766600  | 3.65162900  | -2.94233600 |
| C           | 1.88968100  | -2.34960900 | 0.29553400  | H | 3.54419100  | 4.33381000  | -3.11925700 |
| C           | 2.10968000  | -3.36742800 | -0.63973600 | C | 1.11417400  | 2.02964100  | 1.27423200  |
| C           | 2.83446400  | -2.17220200 | 1.30785400  | C | 1.65605400  | 3.59032400  | -3.84427800 |
| C           | 3.28414700  | -4.11661500 | -0.62098100 | H | 1.65395500  | 4.22842800  | -4.72347700 |
| C           | 4.00241500  | -2.93457200 | 1.34636500  | C | -1.87392400 | 2.58678400  | -0.18791000 |
| C           | 4.24256100  | -3.89180600 | 0.36630300  | H | -1.41144400 | 2.53157400  | 0.79148900  |
| H           | 3.44370900  | -4.89502500 | -1.36564300 | C | -5.50263800 | -2.68138000 | -1.93615000 |
| H           | 4.73132200  | -2.76499700 | 2.13450300  | H | -6.29945200 | -3.25290200 | -2.40360100 |
| H           | 5.15691600  | -4.47866500 | 0.38266600  | C | -4.79081400 | -0.98444000 | -0.37694700 |
| H           | 2.68639200  | -1.40746200 | 2.06677900  | H | -5.03508600 | -0.23641700 | 0.37204700  |
| C           | -0.61326500 | -3.02663700 | 0.18386200  | C | 5.36134400  | -0.55578600 | -0.55845500 |
| O           | -1.39855200 | -3.37707200 | 1.05364900  | H | 5.87835000  | -1.13650400 | -1.31629900 |
| C           | 0.96771800  | -3.67864000 | -1.58645500 | C | -2.38910000 | 1.43055200  | -0.78702200 |
| H           | 0.82318800  | -2.85922100 | -2.30216400 | C | -3.16003700 | 0.20752800  | 4.46118000  |
| H           | 1.16285700  | -4.58473100 | -2.16809700 | H | -3.38279200 | 0.29587200  | 5.52081800  |
| N           | -0.27419300 | -3.88400300 | -0.84242400 | C | 3.34662200  | 0.53297200  | 0.22279500  |
| H           | -0.51592100 | -4.84852300 | -0.64020800 | C | -4.17729900 | -2.91452200 | -2.28691600 |
| <b>TSB9</b> |             |             |             | H | -3.93274000 | -3.67227900 | -3.02556800 |
| Pd          | 0.15572700  | -1.08231100 | -0.10552100 | C | 1.66040300  | 1.95541600  | -1.57494800 |
| P           | -2.08411200 | -0.21639800 | -0.02749200 | C | -3.05320100 | 2.76918600  | -2.69633100 |
| P           | 1.57689700  | 0.88869300  | -0.08713000 | H | -3.52075100 | 2.83440100  | -3.67472700 |
| C           | -1.94630600 | 3.81484400  | -0.83452800 | C | 5.34396700  | 0.53944500  | 1.58677700  |
| H           | -1.53149300 | 4.69483000  | -0.35200900 | H | 5.85145200  | 0.82963100  | 2.50232600  |
| C           | 4.03101500  | -0.20839800 | -0.74706500 | C | 6.02173000  | -0.18393200 | 0.61138600  |
| H           | 3.51250900  | -0.53046500 | -1.64634200 | H | 7.06050700  | -0.46247100 | 0.76331400  |
| C           | 4.01145700  | 0.90048000  | 1.39312000  | C | 0.60606200  | 2.70517800  | -3.62159600 |
| H           | 3.49205900  | 1.47017000  | 2.15810200  | H | -0.22327200 | 2.64880000  | -4.31993200 |
| C           | -2.10784200 | -0.97579800 | 2.63599000  | C | -2.40468600 | -0.86519600 | 3.99114100  |
| H           | -1.52933300 | -1.82445800 | 2.27357100  | H | -2.04371900 | -1.62221300 | 4.68118100  |
| C           | 0.61238300  | 1.88662700  | -2.49550500 | C | -2.98424000 | 1.53780500  | -2.04847100 |

|   |             |             |             |
|---|-------------|-------------|-------------|
| H | -3.39552800 | 0.65623100  | -2.53124300 |
| C | 0.74384400  | 4.21623000  | 2.24137700  |
| H | 0.83009900  | 5.29697800  | 2.17339400  |
| C | 0.51784300  | 1.45245300  | 2.40130500  |
| H | 0.39318600  | 0.37390800  | 2.44989400  |
| C | -2.53163200 | 3.91053400  | -2.09423100 |
| H | -2.58155400 | 4.86864000  | -2.60288700 |
| C | -5.80844000 | -1.71669500 | -0.97645500 |
| H | -6.84206600 | -1.53649100 | -0.69586500 |
| C | 0.02928000  | 2.24613600  | 3.43425300  |
| H | -0.46122500 | 1.77826200  | 4.28232900  |
| C | 0.13572700  | 3.63213800  | 3.35097400  |
| H | -0.25969800 | 4.25788100  | 4.14579700  |
| C | 1.61747500  | -2.61520700 | 0.19143700  |
| C | 2.10918500  | -3.32551000 | -0.90486600 |
| C | 2.41724700  | -2.49222300 | 1.33316300  |
| C | 3.40764000  | -3.82285800 | -0.91554700 |
| C | 3.71193100  | -3.00234800 | 1.33532700  |
| C | 4.21447100  | -3.65023200 | 0.20743900  |
| H | 3.77545300  | -4.37983200 | -1.77493100 |
| H | 4.33730500  | -2.88351800 | 2.21535500  |
| H | 5.22513300  | -4.04840100 | 0.21514600  |
| H | 2.03698300  | -1.98377200 | 2.21494600  |
| C | -0.24791500 | -3.11058300 | 0.04462200  |
| O | -0.90200800 | -3.56071900 | 0.97170700  |
| C | 1.04463900  | -3.63487300 | -1.93760800 |
| H | 0.98693600  | -2.85411800 | -2.70590900 |
| H | 1.24478400  | -4.58191600 | -2.44794100 |
| N | -0.22471500 | -3.73758800 | -1.21399000 |
| H | -0.59946200 | -4.67845400 | -1.14995500 |

**IntB14**

|    |             |             |             |
|----|-------------|-------------|-------------|
| Pd | -1.30765700 | 0.43391000  | -0.09002900 |
| P  | 1.08506900  | -0.01147300 | -0.00984000 |
| C  | 0.78460800  | -0.86986100 | 2.61419600  |
| H  | 0.00451500  | -0.11327200 | 2.65856100  |
| C  | 2.46796400  | -2.06559800 | 1.36239000  |
| H  | 3.00742200  | -2.24097900 | 0.43642700  |
| C  | 0.95223300  | -1.93411800 | -2.00315800 |
| H  | -0.01289100 | -2.14591100 | -1.54115400 |
| C  | 2.99017700  | -0.62415700 | -2.01979800 |
| H  | 3.60834100  | 0.16700200  | -1.60654900 |
| C  | 2.09962000  | 2.45756200  | -0.76938500 |
| H  | 1.37639600  | 2.38109000  | -1.57808500 |
| C  | 3.44832900  | -1.35518300 | -3.11273800 |

|   |             |             |             |
|---|-------------|-------------|-------------|
| H | 4.41915600  | -1.12768800 | -3.54306900 |
| C | 2.21101000  | 1.42209800  | 0.16733800  |
| C | 2.66452900  | -2.37236800 | -3.65064300 |
| H | 3.02362300  | -2.93995500 | -4.50437100 |
| C | 1.07476200  | -1.63545700 | 3.73900500  |
| H | 0.52581700  | -1.46948200 | 4.66089100  |
| C | 1.48253500  | -1.07691700 | 1.41918900  |
| C | 1.73948300  | -0.90925900 | -1.46281900 |
| C | 2.75345500  | -2.83303700 | 2.48811800  |
| H | 3.51699900  | -3.60322400 | 2.43464100  |
| C | 2.05956500  | -2.61849200 | 3.67623100  |
| H | 2.28190800  | -3.22128800 | 4.55170900  |
| C | 1.42077600  | -2.66085200 | -3.09306000 |
| H | 0.80843200  | -3.45468900 | -3.51057800 |
| C | 2.91755900  | 3.57763000  | -0.68503500 |
| H | 2.82306200  | 4.37137100  | -1.41972300 |
| C | 3.15178300  | 1.53160500  | 1.19348600  |
| H | 3.25263500  | 0.73703400  | 1.92620800  |
| C | 3.96428300  | 2.66034700  | 1.28224500  |
| H | 4.68963300  | 2.73705300  | 2.08670700  |
| C | 3.85020600  | 3.68242300  | 0.34553200  |
| H | 4.48479200  | 4.56059100  | 0.41743100  |
| C | -3.34862300 | 0.37385000  | -0.05154000 |
| C | -3.86728100 | -0.93085400 | -0.16085900 |
| C | -4.24159400 | 1.43966800  | 0.09194800  |
| C | -5.24522200 | -1.14374700 | -0.13519000 |
| C | -5.61886300 | 1.22026900  | 0.12256700  |
| C | -6.12200500 | -0.07188100 | 0.00807000  |
| H | -5.63596300 | -2.15594900 | -0.21931100 |
| H | -6.29705000 | 2.06196500  | 0.23637700  |
| H | -7.19429600 | -0.24565800 | 0.03636300  |
| H | -3.87983700 | 2.46023900  | 0.18508000  |
| N | -1.50288800 | -1.57816600 | 0.01650000  |
| H | -1.32606200 | -1.81355900 | 0.99253000  |
| C | -2.85520500 | -2.02645900 | -0.33313100 |
| H | -2.85309000 | -2.33780200 | -1.38949300 |
| H | -3.12813700 | -2.92200000 | 0.24435300  |
| C | -1.24723900 | 2.35943900  | -0.22601700 |
| O | -1.25250800 | 3.49932600  | -0.27789400 |

**TSB10**

|    |             |             |            |
|----|-------------|-------------|------------|
| Pd | -1.19856600 | 0.03460100  | 0.15273900 |
| P  | 1.08453400  | 0.04615500  | 0.04810600 |
| C  | 1.26284300  | -0.46281400 | 2.77094900 |
| H  | 0.44508300  | 0.25033200  | 2.84592600 |

|   |             |             |             |
|---|-------------|-------------|-------------|
| C | 2.81989100  | -1.72242200 | 1.42175600  |
| H | 3.22240800  | -1.99267700 | 0.45018400  |
| C | 1.01271500  | -2.09251300 | -1.70909000 |
| H | 0.12327800  | -2.38068500 | -1.13720000 |
| C | 2.81817500  | -0.52194200 | -2.11558200 |
| H | 3.34468300  | 0.39503500  | -1.86886800 |
| C | 1.40663700  | 2.70145300  | -0.72705400 |
| H | 0.41875200  | 2.59550700  | -1.16438900 |
| C | 3.26284000  | -1.30916700 | -3.17429200 |
| H | 4.13279700  | -1.00050800 | -3.74643000 |
| C | 1.98281300  | 1.63661600  | -0.02775300 |
| C | 2.59194900  | -2.48539100 | -3.49832300 |
| H | 2.94012600  | -3.09741000 | -4.32559000 |
| C | 1.77965700  | -1.05028700 | 3.91977800  |
| H | 1.36825800  | -0.79134700 | 4.89064100  |
| C | 1.78408200  | -0.79028600 | 1.51470200  |
| C | 1.69508800  | -0.91281800 | -1.38057100 |
| C | 3.33251700  | -2.31293300 | 2.57442200  |
| H | 4.13487500  | -3.04020700 | 2.49441100  |
| C | 2.81587200  | -1.97695400 | 3.82223600  |
| H | 3.21534300  | -2.44141600 | 4.71890500  |
| C | 1.47189200  | -2.87327600 | -2.76587600 |
| H | 0.94447200  | -3.78769700 | -3.02132400 |
| C | 2.08911700  | 3.90792100  | -0.85002600 |
| H | 1.63244000  | 4.72931300  | -1.39359600 |
| C | 3.24401400  | 1.79856300  | 0.55576000  |
| H | 3.69774200  | 0.98058700  | 1.10755300  |
| C | 3.92050100  | 3.00869400  | 0.43497800  |
| H | 4.89737000  | 3.12750300  | 0.89417200  |
| C | 3.34532200  | 4.06328200  | -0.26978100 |
| H | 3.87387500  | 5.00758400  | -0.36146200 |
| C | -3.36397800 | 0.63174300  | -0.12304800 |
| C | -3.77081900 | -0.69881800 | -0.43052700 |
| C | -4.24407200 | 1.49723600  | 0.54339100  |
| C | -5.07892100 | -1.06279300 | -0.09436000 |
| C | -5.53889700 | 1.10550700  | 0.85132000  |
| C | -5.95815000 | -0.17965800 | 0.52082700  |
| H | -5.40421100 | -2.07785100 | -0.30659600 |
| H | -6.21464700 | 1.80006900  | 1.34025300  |
| H | -6.96880800 | -0.50071300 | 0.75651400  |
| H | -3.91924900 | 2.50565200  | 0.78276500  |
| N | -1.68104000 | -2.04290600 | -0.01025200 |
| H | -2.07439700 | -2.40233900 | 0.86062100  |
| C | -2.80107100 | -1.78250200 | -0.92319000 |

|   |             |             |             |
|---|-------------|-------------|-------------|
| H | -2.38810300 | -1.47431900 | -1.89628200 |
| H | -3.38704700 | -2.69488300 | -1.12184800 |
| C | -2.01177400 | 1.56447800  | -0.57873000 |
| O | -2.07639800 | 2.52766400  | -1.25571000 |

### TSB11

|    |             |             |             |
|----|-------------|-------------|-------------|
| Pd | 0.19564800  | -0.94480600 | -0.33196600 |
| P  | 1.58509500  | 0.85894400  | 0.14864300  |
| P  | -2.14445800 | -0.07321300 | -0.22330400 |
| C  | 0.32651700  | 3.99673600  | 2.53626100  |
| H  | 0.40618700  | 5.07982400  | 2.55859600  |
| C  | -3.00454900 | -2.36579700 | -1.54960700 |
| H  | -1.99390600 | -2.72720700 | -1.38055000 |
| C  | -4.70307700 | -0.66580700 | -1.28321100 |
| H  | -5.00593500 | 0.31561600  | -0.92720600 |
| C  | 0.90361600  | 2.10910400  | -2.24232800 |
| H  | 0.04677000  | 1.44317900  | -2.22162000 |
| C  | -2.57733100 | -1.07329000 | 2.30792800  |
| H  | -1.98288600 | -1.91003400 | 1.94501600  |
| C  | 2.96885400  | 2.89086600  | -1.27186200 |
| H  | 3.72907000  | 2.83338900  | -0.49796400 |
| C  | 1.85940200  | 2.03813900  | -1.22592100 |
| C  | -3.68586500 | 1.03578000  | 1.92910400  |
| H  | -3.93753000 | 1.87018000  | 1.28199900  |
| C  | 3.10712900  | 3.80727600  | -2.30926400 |
| H  | 3.97253300  | 4.46287000  | -2.33731800 |
| C  | 3.72973700  | 0.85363900  | 2.01694400  |
| H  | 3.06202900  | 1.35186700  | 2.71317300  |
| C  | -1.95246600 | 2.72836500  | -0.20572500 |
| H  | -1.65853700 | 2.62838700  | 0.83378300  |
| C  | 3.28819200  | 0.53006100  | 0.73020400  |
| C  | -4.17574200 | 1.00997400  | 3.23246900  |
| H  | -4.80393000 | 1.82238600  | 3.58636100  |
| C  | -2.35508500 | 1.60213900  | -0.93459100 |
| C  | -3.86688500 | -0.05358900 | 4.07582500  |
| H  | -4.25083300 | -0.07300100 | 5.09175900  |
| C  | 0.97366400  | 3.27861000  | 1.53463900  |
| H  | 1.53758100  | 3.80718800  | 0.77236000  |
| C  | 5.89821500  | -0.08607400 | 1.52454900  |
| H  | 6.91176200  | -0.32501400 | 1.83342500  |
| C  | 4.16320400  | -0.11460100 | -0.15045900 |
| H  | 3.82782200  | -0.39512700 | -1.14574400 |
| C  | -3.93889400 | -3.18939900 | -2.17704400 |
| H  | -3.63995800 | -4.17872000 | -2.50931800 |
| C  | 0.86609100  | 1.88565800  | 1.48726800  |

|   |             |             |             |
|---|-------------|-------------|-------------|
| C | 2.14066500  | 3.88097300  | -3.31063700 |
| H | 2.25098900  | 4.59711000  | -4.11982100 |
| C | -3.38186100 | -1.09660400 | -1.10570900 |
| C | 5.02880700  | 0.54447100  | 2.41112500  |
| H | 5.36229600  | 0.80256900  | 3.41207800  |
| C | -2.86849300 | 0.00438900  | 1.46227600  |
| C | -0.53118100 | 1.94418200  | 3.46911600  |
| H | -1.13832300 | 1.41574400  | 4.19785200  |
| C | -5.62753100 | -1.48596400 | -1.91642700 |
| H | -6.64932200 | -1.14444000 | -2.05437600 |
| C | -5.24407500 | -2.75034900 | -2.36575700 |
| H | -5.96940500 | -3.39367500 | -2.85569800 |
| C | -3.07629600 | -1.10097400 | 3.60611200  |
| H | -2.84965500 | -1.94676000 | 4.24830500  |
| C | 1.03982200  | 3.03057500  | -3.27616100 |
| H | 0.28144500  | 3.07947800  | -4.05132000 |
| C | 0.11943700  | 1.22745700  | 2.46966600  |
| H | 0.01267000  | 0.14680400  | 2.42695500  |
| C | -1.91773400 | 3.98398800  | -0.80155500 |
| H | -1.59460500 | 4.84055000  | -0.21748500 |
| C | -2.71830200 | 1.76600200  | -2.27656700 |
| H | -3.02819600 | 0.90661600  | -2.86379200 |
| C | -0.43340000 | 3.33281900  | 3.49832000  |
| H | -0.95304300 | 3.89879200  | 4.26585200  |
| C | 5.46263500  | -0.41322100 | 0.24325800  |
| H | 6.12489100  | -0.92166200 | -0.45072300 |
| C | -2.68363300 | 3.02511400  | -2.87051700 |
| H | -2.97295700 | 3.13390600  | -3.91190600 |
| C | -2.28091200 | 4.13746600  | -2.13662500 |
| H | -2.24727600 | 5.11730600  | -2.60343700 |
| C | 1.61587100  | -2.40308600 | -0.84135600 |
| C | 1.85299500  | -2.40810200 | -2.22399600 |
| C | 3.80963000  | -3.31332600 | -0.45231800 |
| C | 3.10354300  | -2.79854000 | -2.69237400 |
| C | 4.09103900  | -3.25279600 | -1.81719900 |
| H | 4.55908600  | -3.68491300 | 0.24320800  |
| H | 3.29867400  | -2.76485600 | -3.76105600 |
| H | 5.05433000  | -3.58032600 | -2.19447100 |
| H | 1.07132800  | -2.10178300 | -2.91318800 |
| N | 0.92419900  | -3.62808000 | 1.64500100  |
| H | 0.67220300  | -3.95590800 | 2.56442000  |
| C | -0.14661200 | -3.61975600 | 0.78816900  |
| O | -1.22773100 | -4.07877500 | 1.12195300  |
| O | 0.03955400  | -3.13171400 | -0.44839000 |

|   |            |             |            |
|---|------------|-------------|------------|
| C | 2.58742800 | -2.88726700 | 0.04755600 |
| C | 2.20345100 | -2.94473300 | 1.49247800 |
| H | 2.95421400 | -3.49554900 | 2.06757200 |
| H | 2.14694900 | -1.92224200 | 1.90477100 |

### IntB15

|    |             |             |             |
|----|-------------|-------------|-------------|
| Pd | -0.04406600 | -0.58746800 | -0.81070800 |
| P  | 1.64348200  | 0.85193800  | -0.11993400 |
| P  | -2.23514500 | -0.17218100 | -0.16589500 |
| C  | 0.94935400  | 2.98379300  | 3.37091000  |
| H  | 1.02353400  | 4.01083600  | 3.71764900  |
| C  | -3.42930600 | -1.19893900 | -2.44890500 |
| H  | -2.42142600 | -1.10369200 | -2.84852100 |
| C  | -4.95784600 | -0.96536000 | -0.60258800 |
| H  | -5.15757400 | -0.69643400 | 0.43052300  |
| C  | 0.53352400  | 2.91602700  | -1.61161000 |
| H  | -0.34618200 | 2.27885100  | -1.61045100 |
| C  | -1.92913400 | -1.79965100 | 2.05366900  |
| H  | -1.23223800 | -2.33478000 | 1.41543600  |
| C  | 2.83401600  | 3.29967700  | -1.00371700 |
| H  | 3.75279300  | 2.97230100  | -0.52528300 |
| C  | 1.70440300  | 2.47320100  | -0.98777900 |
| C  | -3.46651300 | 0.01932600  | 2.41389800  |
| H  | -3.97932300 | 0.90887700  | 2.05852600  |
| C  | 2.78977100  | 4.54312900  | -1.62782500 |
| H  | 3.67434700  | 5.17371700  | -1.63581000 |
| C  | 4.12502300  | 0.22033900  | 1.15516700  |
| H  | 3.62632100  | 0.40394300  | 2.10239600  |
| C  | -1.96756000 | 2.42621100  | 0.84091900  |
| H  | -1.42858400 | 1.95462500  | 1.65719400  |
| C  | 3.42939900  | 0.40767200  | -0.04225000 |
| C  | -3.65365600 | -0.40395500 | 3.72646100  |
| H  | -4.32387200 | 0.14811100  | 4.37936900  |
| C  | -2.57097700 | 1.63691500  | -0.14771600 |
| C  | -2.97712000 | -1.52478500 | 4.20496000  |
| H  | -3.11769500 | -1.84570400 | 5.23341500  |
| C  | 1.37859200  | 2.65839700  | 2.08591500  |
| H  | 1.76782300  | 3.43807600  | 1.43858400  |
| C  | 6.11547900  | -0.41242000 | -0.06221800 |
| H  | 7.15575400  | -0.72445600 | -0.06927000 |
| C  | 4.09709100  | 0.17032200  | -1.25077600 |
| H  | 3.56345400  | 0.29955100  | -2.18927800 |
| C  | -4.46212400 | -1.68053300 | -3.24984100 |
| H  | -4.26413300 | -1.95991200 | -4.28076000 |
| C  | 1.27179200  | 1.34624800  | 1.61662400  |

|   |             |             |             |
|---|-------------|-------------|-------------|
| C | 1.61415500  | 4.97984000  | -2.23498900 |
| H | 1.58045500  | 5.95257200  | -2.71755200 |
| C | -3.66629400 | -0.82908400 | -1.12139000 |
| C | 5.45700800  | -0.19296100 | 1.14514000  |
| H | 5.98527300  | -0.32770400 | 2.08511500  |
| C | -2.59943100 | -0.67556000 | 1.56302900  |
| C | 0.32252900  | 0.68809000  | 3.75192400  |
| H | -0.10850800 | -0.08649500 | 4.37880200  |
| C | -5.98814100 | -1.45748500 | -1.39729400 |
| H | -6.98579200 | -1.56487500 | -0.98129900 |
| C | -5.74341500 | -1.81257600 | -2.72275800 |
| H | -6.54999300 | -2.19642500 | -3.34071100 |
| C | -2.11350800 | -2.22399300 | 3.36603500  |
| H | -1.55437600 | -3.08190300 | 3.72468600  |
| C | 0.48577100  | 4.16491800  | -2.22352600 |
| H | -0.43813900 | 4.49562300  | -2.68828600 |
| C | 0.74870700  | 0.36572700  | 2.46814300  |
| H | 0.63212900  | -0.65362900 | 2.11367800  |
| C | -2.04123100 | 3.81205700  | 0.78362900  |
| H | -1.55667400 | 4.40243800  | 1.55569300  |
| C | -3.25274700 | 2.26965200  | -1.19028400 |
| H | -3.72996900 | 1.67739700  | -1.96606900 |
| C | 0.41416500  | 2.00308500  | 4.20284300  |
| H | 0.06330800  | 2.26443500  | 5.19707700  |
| C | 5.43084900  | -0.22380200 | -1.26289500 |
| H | 5.93657300  | -0.38927700 | -2.21024800 |
| C | -3.32146000 | 3.66104600  | -1.24857000 |
| H | -3.85535900 | 4.13749400  | -2.06620700 |
| C | -2.71429800 | 4.43610700  | -0.26515800 |
| H | -2.76368300 | 5.51994400  | -0.31528100 |
| C | 1.06845300  | -3.13176200 | -0.79735700 |
| C | 0.04927800  | -2.94747800 | -1.73581800 |
| C | 2.75093900  | -2.63212200 | -2.43029800 |
| C | 0.41400400  | -2.57121000 | -3.03407400 |
| C | 1.75492100  | -2.41704300 | -3.38010000 |
| H | 3.79751400  | -2.50333500 | -2.69061900 |
| H | -0.36224400 | -2.42318300 | -3.77811600 |
| H | 2.02313600  | -2.13337200 | -4.39270900 |
| H | -0.97738000 | -3.17732200 | -1.47376900 |
| N | 2.76052500  | -2.89569900 | 1.24484000  |
| H | 3.32592400  | -2.65549600 | 2.04386500  |
| C | 1.48118200  | -3.23287800 | 1.54085500  |
| O | 1.00406700  | -3.24950100 | 2.65239200  |
| O | 0.69788300  | -3.55400300 | 0.46556400  |

|   |            |             |             |
|---|------------|-------------|-------------|
| C | 2.41240300 | -2.97513100 | -1.12726800 |
| C | 3.41230700 | -3.17085800 | -0.02481400 |
| H | 3.81842300 | -4.19391100 | -0.04088900 |
| H | 4.24695300 | -2.47498000 | -0.13821900 |

#### prodB4

|   |             |             |             |
|---|-------------|-------------|-------------|
| C | 0.27991300  | -0.58291300 | 0.09305100  |
| C | 1.32847000  | -1.49263900 | 0.01361300  |
| C | 1.81663800  | 1.24941200  | -0.02754600 |
| C | 2.63058400  | -1.01679200 | -0.07951800 |
| C | 2.87882400  | 0.35510200  | -0.10164000 |
| H | 2.00226500  | 2.32041000  | -0.04860200 |
| H | 3.45436000  | -1.72098600 | -0.14082300 |
| H | 3.89567000  | 0.72572600  | -0.18031200 |
| H | 1.10579800  | -2.55397400 | 0.02585900  |
| N | -1.86715000 | 0.98867700  | -0.24894300 |
| H | -2.72491000 | 1.51166100  | -0.34358300 |
| C | -2.09397100 | -0.34327600 | -0.04263000 |
| O | -3.17673900 | -0.86800700 | -0.09975900 |
| O | -0.98776100 | -1.10572000 | 0.20864000  |
| C | 0.50620300  | 0.78837700  | 0.07580600  |
| C | -0.68100800 | 1.70104500  | 0.19579100  |
| H | -0.79257900 | 2.05135900  | 1.23375700  |
| H | -0.54846500 | 2.58498800  | -0.43630600 |
